# Supplementary material for: Global spectrum of USH2A mutation in inherited retinal dystrophies: Prompt message for development of base editing therapy
Source: Front Aging Neurosci. 2022 Aug 10;14:948279. doi: 10.3389/fnagi.2022.948279 (PMC9399374; doi:10.3389/fnagi.2022.948279)
Supplement: Supplementary file 2 [file Table_2.XLSX]

## Sheet: Sheet1
Table S2. USH2A variants reported in multiple studies
Country or region	ID	Alleles	Diagnosis	Exon	Variant (NM_206933.2)	Base Editing	Protein Change)	Variant Type	Region	References
China	F013	1	RP	Exon5	c.820C>T	ABE	p.(Arg274*)	null (nonsense)	EAS	1
	F013	1	RP	Exon70	c.15178T>C	CBE	p.(Ser5060Pro)	missense	EAS	1
	F016	1	RP	Exon13	c.2187C>A	N	p.(Cys729*)	null (nonsense)	EAS	1
	F016	1	RP	IVS66	c.14583-40_14583-10del	N	p.(?)	intron variant	EAS	1
	F024	1	RP	Exon17	c.3665C>T	ABE	p.(Ala1222Val)	missense	EAS	1
	F024	1	RP	Exon21	c.4576G>A	ABE	p.(Gly1526Arg)	missense	EAS	1
	F036	1	RP	Exon2	c.100_101insT	N	p.(Arg34Leufs*41)	null (frameshift)	EAS	1
	F036	1	RP	Exon53	c.10582A>G	GBE*	p.(Asn3528Asp)	missense	EAS	1
	F038	1	RP	Exon63	c.12503C>A	N	p.(Ser4168Tyr)	missense	EAS	1
	F038	1	RP	Exon63	c.13731_13743del	N	p.(Lys4578*)	null (nonsense)	EAS	1
	F050	1	RP	Exon13	c.2802T>G	GBE*	p.(Cys934Trp)	missense	EAS	1
	F050	1	RP	Exon14	c.2955C>A	N	p.(Cys985*)	null (nonsense)	EAS	1
	F051	1	RP	Exon13	c.2802T>G	GBE*	p.(Cys934Trp)	missense	EAS	1
	F051	1	RP	Exon28	c.5581G>A	ABE	p.(Gly1861Ser)	missense	EAS	1
	F060	1	RP	Exon63	c.13339A>G	CBE	p.(Met4447Val)	missense	EAS	1
	F060	1	RP	IVS58	c.11389+3A>T	N	p.(?)	intron variant	EAS	1
	F080	1	RP	Exon3	c.538T>C	CBE	p.(Ser180Pro)	missense	EAS	1
	F080	1	RP	Exon13	c.2802T>G	GBE*	p.(Cys934Trp)	missense	EAS	1
	F084	1	RP	Exon63	c.13045_13046insG	N	p.(Ile4349Serfs*40)	null (frameshift)	EAS	1
	F084	1	RP	Exon65	c.14287G>A	ABE	p.(Gly4763Arg)	missense	EAS	1
	F123	1	RP	Exon21	c.4576G>A	ABE	p.(Gly1526Arg)	missense	EAS	1
	F123	1	RP	Exon17	c.3635C>T	ABE	p.(Pro1212Leu)	missense	EAS	1
	F131	1	RP	Exon13	c.2802T>G	GBE*	p.(Cys934Trp)	missense	EAS	1
	F131	1	RP	Exon55	c.10859T>C	CBE	p.(Ile3620Thr)	missense	EAS	1
	F186	1	RP	IVS60	c.11712-2A>C	N	p.(?)	splice	EAS	1
	F186	1	RP	Exon28	c.5603_5613del	N	p.(Phe1868Cysfs*4)	null (frameshift)	EAS	1
	F201	1	RP	Exon13	c.2802T>G	GBE*	p.(Cys934Trp)	missense	EAS	1
	F201	1	RP	Exon13	c.2802T>G	GBE*	p.(Cys934Trp)	missense	EAS	1
	F219	1	RP	Exon20	c.4384delA	N	p.(Thr1462Leufs*2)	null (frameshift)	EAS	1
	F219	1	RP	Exon27	c.5329C>T	ABE	p.(Arg1777Trp)	missense	EAS	1
	F227	1	RP	Exon25	c.5104G>A	ABE	p.(Val1702Met)	missense	EAS	1
	F227	1	RP	Exon25	c.5104G>A	ABE	p.(Val1702Met)	missense	EAS	1
	F261	1	RP	Exon58	c.11288A>G	CBE	p.(Tyr3763Cys)	missense	EAS	1
	F261	1	RP	Exon58	c.11288A>G	CBE	p.(Tyr3763Cys)	missense	EAS	1
	F279	1	RP	Exon58	c.11288A>G	CBE	p.(Tyr3763Cys)	missense	EAS	1
	F279	1	RP	Exon58	c.11288A>G	CBE	p.(Tyr3763Cys)	missense	EAS	1
	F294	1	RP	Exon6	c.951delG	N	p.(Tyr318Thrfs*18)	null (frameshift)	EAS	1
	F294	1	RP	Exon6	c.951delG	N	p.(Tyr318Thrfs*18)	null (frameshift)	EAS	1
	F295	1	RP	IVS48	c.9570+1G>A	ABE	p.(?)	splice	EAS	1
	F295	1	RP	Exon21	c.4576G>A	ABE	p.(Gly1526Arg)	missense	EAS	1
	F297	1	RP	Exon29	c.5836C>T	ABE	p.(Arg1946*)	null (nonsense)	EAS	1
	F297	1	RP	Exon55	c.10859T>C	CBE	p.(Ile3620Thr)	missense	EAS	1
	F308	1	RP	Exon13	c.2802T>G	GBE*	p.(Cys934Trp)	missense	EAS	1
	F308	1	RP	Exon63	c.13007G>A	ABE	p.(Cys4336Tyr)	missense	EAS	1
	F6-II-2	1	USH	Exon63	c.13339A>G	CBE	p.(Met4447Val)	missense	EAS	2
	F6-II-2	1	USH	IVS42	c.8559-2A>G	CBE	p.(Tyr2854_Arg2894del)	splice	EAS	2
	F8-II-3	1	USH	Exon63	c.13339A>G	CBE	p.(Met4447Val)	missense	EAS	2
	F8-II-3	1	USH	Exon13	c.2802T>G	GBE*	p.(Cys934Trp)	missense	EAS	2
	F12-II-3	1	USH	Exon13	c.2802T>G	GBE*	p.(Cys934Trp)	missense	EAS	2
	F12-II-3	1	USH	IVS42	c.8559-2A>G	CBE	p.(Tyr2854_Arg2894del)	splice	EAS	2
	F24-III	1	USH	Exon63	c.13339A>G	CBE	p.(Met4447Val)	missense	EAS	2
	F24-III	1	USH	Exon43	c.8576G>A	ABE	p.(Arg2859His)	missense	EAS	2
		4	RP	Exon2	c.99_100insT	N	p.(Arg34Serfs*41)	null (frameshift)	EAS	3
		1	RP	Exon2	c.100_101insT	N	p.(Arg34Leufs*41)	null (frameshift)	EAS	3
		1	RP	Exon2	c.386T>C	CBE	p.(Phe129Ser)	missense	EAS	3
		1	RP	Exon3	c.538T>C	CBE	p.(Ser180Pro)	missense	EAS	3
		1	RP	Exon4	c.768A>G	CBE	p.(Ile256Met)	missense	EAS	3
		2	RP	Exon5	c.802G>A	ABE	p.(Gly268Arg)	missense	EAS	3
		1	RP	Exon6	c.905G>A	ABE	p.(Cys302Tyr)	missense	EAS	3
		1	RP	Exon6	c.1000C>T	ABE	p.(Arg334Trp)	missense	EAS	3
		1	RP	Exon6	c.1048G>A	ABE	p.(Val350Ile)	missense	EAS	3
		1	RP	Exon7	c.1144-2A>C	N	p.(?)	splice	EAS	3
		2	RP	Exon8	c.1397G>T	N	p.(Gly466Val)	missense	EAS	3
		1	RP	Exon8	c.1435T>A	N	p.(Phe479Ile)	missense	EAS	3
		1	RP	IVS8	c.1551-27A>G	CBE	p.(?)	intron variant	EAS	3
		1	RP	Exon9	c.1581C>G	GBE	p.(Cys527Trp)	missense	EAS	3
		1	RP	Exon10	c.1654T>C	CBE	p.(Cys552Arg)	missense	EAS	3
		1	RP	Exon10	c.1675A>C	N	p.(Lys559Gln)	missense	EAS	3
		1	RP	Exon11	c.1876C>T	ABE	p.(Arg626*)	null (nonsense)	EAS	3
		1	RP	Exon12	c.2023C>T	ABE	p.(Gln675*)	null (nonsense)	EAS	3
		1	RP	Exon13	c.2339G>T	N	p.(Cys780Phe)	missense	EAS	3
		1	RP	Exon13	c.2373T>G	GBE*	p.(Asn791Lys)	missense	EAS	3
		2	RP	Exon13	c.2792G>A	ABE	p.(Cys931Tyr)	missense	EAS	3
		1	RP	Exon13	c.2797C>T	ABE	p.(Gln933*)	null (nonsense)	EAS	3
		38	RP	Exon13	c.2802T>G	GBE*	p.(Cys934Trp)	missense	EAS	3
		1	RP	Exon16	c.3314A>C	N	p.(Tyr1105Ser)	missense	EAS	3
		1	RP	Exon17	c.3464_3468del	N	p.(Ser1155Asnfs*46)	null (frameshift)	EAS	3
		1	RP	Exon17	c.3544T>C	CBE	p.(Tyr1182His)	missense	EAS	3
		1	RP	Exon20	c.4298G>A	ABE	p.(Gly1433Glu)	missense	EAS	3
		1	RP	Exon20	c.4378G>A	ABE	p.(Gly1460Arg)	missense	EAS	3
		2	RP	Exon21	c.4481A>T	N	p.(Asn1494Ile)	missense	EAS	3
		1	RP	Exon21	c.4576G>A	ABE	p.(Gly1526Arg)	missense	EAS	3
		1	RP	IVS21	c.4627+2T>C	CBE	p.(?)	splice	EAS	3
		1	RP	Exon23	c.4759_4762del	N	p.(Gly1587Hisfs*5)	null (frameshift)	EAS	3
		1	RP	Exon23	c.4822C>A	N	p.(His1608Asn)	missense	EAS	3
		2	RP	Exon24	c.4957C>T	ABE	p.(Arg1653*)	null (nonsense)	EAS	3
		1	RP	Exon25	c.5051C>T	ABE	p.(Pro1684Leu)	missense	EAS	3
		1	RP	Exon26	c.5266G>A	ABE	p.(Val1756Ile)	missense	EAS	3
		1	RP	Exon27	c.5329C>T	ABE	p.(Arg1777Trp)	missense	EAS	3
		1	RP	Exon27	c.5485C>T	ABE	p.(Gln1829*)	null (nonsense)	EAS	3
		1	RP	Exon28	c.5581G>A	ABE	p.(Gly1861Ser)	missense	EAS	3
		4	RP	Exon28	c.5608C>T	ABE	p.(Arg1870Trp)	missense	EAS	3
		1	RP	Exon29	c.5836C>T	ABE	p.(Arg1946*)	null (nonsense)	EAS	3
		1	RP	Exon30	c.5953G>A	ABE	p.(Glu1985Lys)	missense	EAS	3
		1	RP	IVS32	c.6325+1G>A	ABE	p.(?)	splice	EAS	3
		2	RP	IVS33	c.6485+5G>A	ABE	p.(Asp2109Glyfs*7)	intron variant	EAS	3
		1	RP	Exon34	c.6576C>T	ABE	p.(Val2192Val)	missense	EAS	3
		1	RP	Exon34	c.6628C>G	GBE	p.(Pro2210Ala)	missense	EAS	3
		1	RP	Exon35	c.6713A>C	N	p.(Glu2238Ala)	missense	EAS	3
		1	RP	Exon35	c.6752C>A	N	p.(Ser2251*)	null (nonsense)	EAS	3
		1	RP	Exon36	c.6923C>A	N	p.(Ala2308Glu)	missense	EAS	3
		1	RP	Exon36	c.6929C>T	ABE	p.(Thr2310Met)	missense	EAS	3
		1	RP	Exon37	c.6986C>A	N	p.(Pro2329His)	missense	EAS	3
		3	RP	Exon37	c.6998T>C	CBE	p.(Val2333Ala)	missense	EAS	3
		2	RP	Exon37	c.7000A>G	CBE	p.(Asn2334Asp)	missense	EAS	3
		1	RP	Exon37	c.7037A>G	CBE	p.(His2346Arg)	missense	EAS	3
		5	RP	Exon37	c.7068T>G	GBE*	p.(Asn2356Lys)	missense	EAS	3
		1	RP	Exon38	c.7211C>G	GBE	p.(Pro2404Arg)	missense	EAS	3
		1	RP	Exon39	c.7403_7405del	N	p.(2468_2469del)	inframe indel	EAS	3
		1	RP	Exon40	c.7475C>T	ABE	p.(Ser2492Leu)	missense	EAS	3
		1	RP	Exon40	c.7526G>C	GBE	p.(Arg2509Pro)	missense	EAS	3
		1	RP	Exon40	c.7569G>A	ABE	p.(Trp2523*)	null (nonsense)	EAS	3
		1	RP	Exon41	c.7616C>T	ABE	p.(Pro2539Leu)	missense	EAS	3
		1	RP	Exon41	c.7698T>A	N	p.(Tyr2566*)	null (nonsense)	EAS	3
		1	RP	Exon41	c.7871C>T	ABE	p.(Pro2624Leu)	missense	EAS	3
		1	RP	Exon41	c.8002G>T	N	p.(Glu2668*)	null (nonsense)	EAS	3
		3	RP	Exon42	c.8232G>C	GBE	p.(Trp2744Cys)	missense	EAS	3
		4	RP	Exon42	c.8254G>A	ABE	p.(Gly2752Arg)	missense	EAS	3
		12	RP	Exon42	c.8284C>G	GBE	p.(Pro2762Ala)	missense	EAS	3
		1	RP	Exon42	c.8389T>C	CBE	p.(Ser2797Pro)	missense	EAS	3
		29	RP	IVS42	c.8559-2A>G	CBE	p.(Tyr2854_Arg2894del)	splice	EAS	3
		1	RP	Exon43	c.8576G>C	GBE	p.(Arg2859Pro)	missense	EAS	3
		1	RP	Exon43	c.8623C>G	GBE	p.(Arg2875Gly)	missense	EAS	3
		1	RP	Exon43	c.8641_8642insTATT	N	p.(Ser2881Leufs*9)	null (frameshift)	EAS	3
		1	RP	Exon44	c.8741G>A	ABE	p.(Arg2914Gln)	missense	EAS	3
		1	RP	Exon45	c.9002A>G	CBE	p.(Asn3001Ser)	missense	EAS	3
		3	RP	Exon47	c.9259G>A	ABE	p.(Val3087Ile)	missense	EAS	3
		1	RP	Exon48	c.9422T>C	CBE	p.(Leu3141Pro)	missense	EAS	3
		1	RP	Exon48	c.9469C>T	ABE	p.(Gln3157*)	null (nonsense)	EAS	3
		4	RP	IVS48	c.9570+1G>A	ABE	p.(?)	splice	EAS	3
		1	RP	Exon49	c.9611A>G	CBE	p.(His3204Arg)	missense	EAS	3
		1	RP	Exon49	c.9676C>T	ABE	p.(Arg3226*)	null (nonsense)	EAS	3
		1	RP	Exon50	c.9815C>T	ABE	p.(Pro3272Leu)	missense	EAS	3
		2	RP	Exon50	c.9915G>C	GBE	p.(Glu3305Asp)	missense	EAS	3
		12	RP	Exon50	c.9958G>T	N	p.(Gly3320Cys)	missense	EAS	3
		3	RP	Exon52	c.10331G>A	ABE	p.(Cys3444Tyr)	missense	EAS	3
		1	RP	Exon52	c.10342G>A	ABE	p.(Glu3448Lys)	missense	EAS	3
		1	RP	Exon53	c.10403C>T	ABE	p.(Pro3468Leu)	missense	EAS	3
		1	RP	Exon53	c.10417G>A	ABE	p.(Glu3473Lys)	missense	EAS	3
		1	RP	Exon53	c.10505T>A	N	p.(Val3502Glu)	missense	EAS	3
		1	RP	Exon53	c.10576C>T	ABE	p.(Gln3526*)	null (nonsense)	EAS	3
		1	RP	Exon54	c.10712C>T	ABE	p.(Thr3571Met)	missense	EAS	3
		1	RP	Exon55	c.10837C>A	N	p.(Pro3613Thr)	missense	EAS	3
		4	RP	Exon55	c.10859T>C	CBE	p.(Ile3620Thr)	missense	EAS	3
		1	RP	Exon55	c.10904C>A	N	p.(Thr3635Asn)	missense	EAS	3
		12	RP	Exon57	c.11156G>A	ABE	p.(Arg3719His)	missense	EAS	3
		1	RP	Exon58	c.11235C>G	GBE	p.(Tyr3745*)	null (nonsense)	EAS	3
		1	RP	IVS58	c.11389+1G>C	GBE	p.(?)	splice	EAS	3
		1	RP	Exon60	c.11549-2A>G	CBE	p.(?)	splice	EAS	3
		1	RP	Exon62	c.12103C>T	ABE	p.(Pro4035Ser)	missense	EAS	3
		1	RP	Exon62	c.12254T>A	N	p.(Leu4085Gln)	missense	EAS	3
		1	RP	Exon62	c.12284del	N	p.(Gly4095Valfs*2)	null (frameshift)	EAS	3
		1	RP	Exon63	c.12575G>A	ABE	p.(Arg4192His)	missense	EAS	3
		1	RP	Exon63	c.12719T>G	N	p.(Ile4240Ser)	missense	EAS	3
		2	RP	Exon63	c.13010C>T	ABE	p.(Thr4337Met)	missense	EAS	3
		1	RP	Exon63	c.13040_13062delinsTCAGAAGTCA	N	p.(Thr4347Ifs*22)	null (frameshift)	EAS	3
		2	RP	Exon63	c.13112_13115delAAAT	N	p.(Gln4371Argfs*19)	null (frameshift)	EAS	3
		2	RP	Exon63	c.13165T>C	CBE	p.(Tyr4389His)	missense	EAS	3
		1	RP	Exon63	c.13172T>C	CBE	p.(Val4391Ala)	missense	EAS	3
		2	RP	Exon63	c.13262T>G	N	p.(Leu4421Arg)	missense	EAS	3
		2	RP	Exon63	c.13274C>T	ABE	p.(Thr4425Met)	missense	EAS	3
		5	RP	Exon63	c.13339A>G	CBE	p.(Met4447Val)	missense	EAS	3
		1	RP	Exon63	c.13445T>G	GBE*	p.(Asp4482Gly)	missense	EAS	3
		1	RP	Exon63	c.13465G>A	ABE	p.(Gly4489Ser)	missense	EAS	3
		1	RP	Exon63	c.13546G>T	N	p.(Gly4516Trp)	missense	EAS	3
		2	RP	IVS63	c.13811+1delG	N	p.(?)	splice	EAS	3
		1	RP	Exon64	c.14017T>C	CBE	p.(Tyr4673His)	missense	EAS	3
		1	RP	Exon64	c.14133G>T	N	p.(Gln4711His)	missense	EAS	3
		1	RP	Exon64	c.14133+1G>T	N	p.(?)	splice	EAS	3
		1	RP	Exon65	c.14222C>T	ABE	p.(Pro4741Leu)	missense	EAS	3
		1	RP	Exon65	c.14285A>G	CBE	p.(Asn4762Ser)	missense	EAS	3
		1	RP	IVS65	c.14343+5G>T	N	p.(?)	intron variant	EAS	3
		2	RP	Exon66	c.14350G>A	ABE	p.(Glu4784Lys)	missense	EAS	3
		1	RP	Exon66	c.14366A>C	N	p.(Pro4789Gln)	missense	EAS	3
		1	RP	Exon66	c.14567A>G	CBE	p.(Asn4856Ser)	missense	EAS	3
		1	RP	Exon66	c.14570G>T	N	p.(Gly4857Val)	missense	EAS	3
		1	RP	Exon68	c.14792-1G>A	ABE	p.(?)	splice	EAS	3
		1	RP	Exon68	c.14795C>A	N	p.(Pro4932His)	missense	EAS	3
		1	RP	Exon68	c.14947delA	N	p.(Ile4983fs)	null (frameshift)	EAS	3
		1	RP	Exon70	c.15104_15105del	N	p.(Thr5035Argfs*142)	null (frameshift)	EAS	3
		1	RP	Exon70	c.15169A>T	N	p.(Ile5057Phe)	missense	EAS	3
		17	RP	Exon70	c.15178T>C	CBE	p.(Ser5060Pro)	missense	EAS	3
		1	RP	Exon71	c.15380C>T	ABE	p.(Pro5127Leu)	missense	EAS	3
		1	RP	Exon71	c.15412C>T	ABE	p.(Gln5138*)	null (nonsense)	EAS	3
		2	RP	Exon71	c.15427C>T	ABE	p.(Arg5143Cys)	missense	EAS	3
		4	USH	Exon2	c.99_100insT	N	p.(Arg34Serfs*41)	null (frameshift)	EAS	3
		2	USH	Exon2	c.100C>T	ABE	p.(Arg34*)	null (nonsense)	EAS	3
		5	USH	Exon2	c.100_101insT	N	p.(Arg34Leufs*41)	null (frameshift)	EAS	3
		1	USH	Exon2	c.187C>T	ABE	p.(Arg63*)	null (nonsense)	EAS	3
		1	USH	Exon2	c.206G>T	N	p.(Ser69Ile)	missense	EAS	3
		1	USH	Exon2	c.302delT	N	p.(Phe101Serfs*44)	null (frameshift)	EAS	3
		1	USH	Exon2	c.458G>T	N	p.(Trp153Leu)	missense	EAS	3
		2	USH	Exon3	c.538T>C	CBE	p.(Ser180Pro)	missense	EAS	3
		1	USH	Exon3	c.568A>C	N	p.(Thr190Pro)	missense	EAS	3
		1	USH	Exon4	c.710delT	N	p.(Phe237Serfs*6)	null (frameshift)	EAS	3
		1	USH	Exon4	c.768A>G	CBE	p.(Ile256Met)	missense	EAS	3
		3	USH	Exon5	c.802G>A	ABE	p.(Gly268Arg)	missense	EAS	3
		1	USH	Exon6	c.991dupA	N	p.(Arg331Lysfs*8)	null (frameshift)	EAS	3
		1	USH	Exon6	c.997T>C	CBE	p.(Ser333Pro)	missense	EAS	3
		2	USH	Exon6	c.1000C>T	ABE	p.(Arg334Trp)	missense	EAS	3
		1	USH	Exon6	c.1048G>A	ABE	p.(Val350Ile)	missense	EAS	3
		1	USH	Exon6	c.1140T>A	N	p.(Tyr380*)	null (nonsense)	EAS	3
		1	USH	Exon7	c.1144-2A>C	N	p.(?)	splice	EAS	3
		1	USH	Exon7	c.1144-2A>T	N	p.(?)	splice	EAS	3
		1	USH	Exon7	c.1144G>A	ABE	p.(Val382Met)	missense	EAS	3
		1	USH	Exon9	c.1589_1590insG	N	p.(Ser531Lysfs*5)	null (frameshift)	EAS	3
		1	USH	Exon9	c.1644+1G>A	ABE	p.(?)	splice	EAS	3
		1	USH	Exon11	c.1876C>T	ABE	p.(Arg626*)	null (nonsense)	EAS	3
		1	USH	Exon12	c.1993_1994insT	N	p.(Lys665Ilefs*25)	null (frameshift)	EAS	3
		1	USH	Exon12	c.2086T>A	N	p.(Cys696Ser)	missense	EAS	3
		1	USH	Exon13	c.2187C>A	N	p.(Cys729*)	null (nonsense)	EAS	3
		1	USH	Exon13	c.2599C>T	ABE	p.(Gln867*)	null (nonsense)	EAS	3
		1	USH	Exon13	c.2661C>A	N	p.(Tyr887*)	null (nonsense)	EAS	3
		11	USH	Exon13	c.2802T>G	GBE*	p.(Cys934Trp)	missense	EAS	3
		1	USH	Exon14	c.2855C>A	N	p.(Ser952*)	null (nonsense)	EAS	3
		1	USH	Exon14	c.2914T>G	N	p.(Cys972Gly)	missense	EAS	3
		1	USH	Exon15	c.3034G>T	N	p.(Glu1012*)	null (nonsense)	EAS	3
		1	USH	Exon16	c.3261C>G	GBE	p.(Tyr1087*)	null (nonsense)	EAS	3
		1	USH	Exon16	c.3309C>A	N	p.(Tyr1103*)	null (nonsense)	EAS	3
		1	USH	Exon17	c.3420_3423del	N	p.(Tyr1141Argfs*11)	null (frameshift)	EAS	3
		1	USH	Exon17	c.3754C>T	ABE	p.(Gln1252*)	null (nonsense)	EAS	3
		1	USH	Exon17	c.3788G>A	ABE	p.(Trp1263*)	null (nonsense)	EAS	3
		1	USH	Exon19	c.4102C>T	ABE	p.(Pro1368Ser)	missense	EAS	3
		1	USH	Exon19	c.4217C>A	N	p.(Ser1406*)	null (nonsense)	EAS	3
		2	USH	Exon20	c.4384delA	N	p.(Thr1462Leufs*2)	null (frameshift)	EAS	3
		1	USH	Exon21	c.4517_4518delAG	N	p.(Glu1506Valfs*23)	null (frameshift)	EAS	3
		2	USH	Exon21	c.4576G>A	ABE	p.(Gly1526Arg)	missense	EAS	3
		1	USH	Exon22	c.4645C>T	ABE	p.(Arg1549*)	null (nonsense)	EAS	3
		3	USH	IVS22	c.4758+3A>G	CBE	p.(?)	intron variant	EAS	3
		1	USH	Exon23	c.4821G>C	GBE	p.(Trp1607Cys)	missense	EAS	3
		1	USH	Exon24	c.4894delG	N	p.(Ala1632Profs*3)	null (frameshift)	EAS	3
		1	USH	IVS25	c.5168-2_5168-1ins17	N	p.(?)	intron variant	EAS	3
		1	USH	Exon26	c.5200G>C	GBE	p.(Gly1734Arg)	missense	EAS	3
		1	USH	Exon27	c.5329C>T	ABE	p.(Arg1777Trp)	missense	EAS	3
		1	USH	Exon27	c.5420delA	N	p.(Lys1807fs)	null (frameshift)	EAS	3
		1	USH	Exon27	c.5492T>G	N	p.(Leu1831Arg)	missense	EAS	3
		1	USH	IVS27	c.5572+1G>A	ABE	p.(?)	splice	EAS	3
		1	USH	Exon28	c.5581G>A	ABE	p.(Gly1861Ser)	missense	EAS	3
		1	USH	Exon28	c.5699G>T	N	p.(Cys1900Phe)	missense	EAS	3
		2	USH	Exon28	c.5735_5736delAA	N	p.(Lys1912Argfs*24)	null (frameshift)	EAS	3
		2	USH	Exon29	c.5836C>T	ABE	p.(Arg1946*)	null (nonsense)	EAS	3
		1	USH	Exon30	c.5976T>G	GBE*	p.(Tyr1992*)	null (nonsense)	EAS	3
		1	USH	Exon33	c.6347_6348insC	N	p.(His2116fs)	null (frameshift)	EAS	3
		1	USH	Exon33	c.6382T>C	CBE	p.(Cys2128Arg)	missense	EAS	3
		3	USH	IVS33	c.6485+5G>A	ABE	p.(Asp2109Glyfs*7)	intron variant	EAS	3
		1	USH	Exon34	c.6488G>A	ABE	p.(Trp2163*)	null (nonsense)	EAS	3
		2	USH	Exon35	c.6752C>A	N	p.(Ser2251*)	null (nonsense)	EAS	3
		1	USH	Exon37	c.7049_7053del	N	p.(2350_2351del)	inframe indel	EAS	3
		1	USH	Exon38	c.7184_7194del	N	p.(Leu2395Hisfs*19)	null (frameshift)	EAS	3
		1	USH	Exon38	c.7231C>T	ABE	p.(Gln2411*)	null (nonsense)	EAS	3
		1	USH	IVS38	c.7300+1G>T	N	p.(?)	splice	EAS	3
		1	USH	Exon40	c.7492A>T	N	p.(Ser2498Cys)	missense	EAS	3
		1	USH	Exon40	c.7521_7522insT	N	p.(Met2507fs)	null (frameshift)	EAS	3
		1	USH	Exon41	c.7698T>A	N	p.(Tyr2566*)	null (nonsense)	EAS	3
		1	USH	Exon41	c.7984A>T	N	p.(Arg2662*)	null (nonsense)	EAS	3
		1	USH	IVS41	c.8223+2T>A	N	p.(?)	splice	EAS	3
		6	USH	Exon42	c.8232G>C	GBE	p.(Trp2744Cys)	missense	EAS	3
		2	USH	Exon42	c.8284C>G	GBE	p.(Pro2762Ala)	missense	EAS	3
		34	USH	IVS42	c.8559-2A>G	CBE	p.(Tyr2854_Arg2894del)	splice	EAS	3
		1	USH	Exon43	c.8584C>T	ABE	p.(Gln2862*)	null (nonsense)	EAS	3
		1	USH	Exon43	c.8641_8642insTATT	N	p.(Ser2881Leufs*9)	null (frameshift)	EAS	3
		2	USH	Exon46	c.9120G>A	ABE	p.(Trp3040*)	null (nonsense)	EAS	3
		1	USH	Exon47	c.9259-1G>T	N	p.(?)	splice	EAS	3
		1	USH	Exon47	c.9259G>A	ABE	p.(Val3087Ile)	missense	EAS	3
		1	USH	Exon47	c.9319G>T	N	p.(Glu3107*)	null (nonsense)	EAS	3
		1	USH	IVS71	c.9371+1G>T	N	p.(?)	splice	EAS	3
		2	USH	Exon48	c.9453T>A	N	p.(Tyr3151*)	null (nonsense)	EAS	3
		6	USH	Exon48	c.9469C>T	ABE	p.(Gln3157*)	null (nonsense)	EAS	3
		1	USH	IVS48	c.9570+1G>A	ABE	p.(?)	splice	EAS	3
		5	USH	Exon49	c.9723C>A	N	p.(Tyr3241*)	null (nonsense)	EAS	3
		1	USH	Exon50	c.9815C>T	ABE	p.(Pro3272Leu)	missense	EAS	3
		2	USH	Exon50	c.9958G>T	N	p.(Gly3320Cys)	missense	EAS	3
		1	USH	Exon51	c.10182+1G>A	ABE	p.(?)	splice	EAS	3
		1	USH	Exon53	c.10576C>T	ABE	p.(Gln3526*)	null (nonsense)	EAS	3
		1	USH	Exon54	c.10612C>T	ABE	p.(Arg3538*)	null (nonsense)	EAS	3
		1	USH	Exon54	c.10712C>T	ABE	p.(Thr3571Met)	missense	EAS	3
		1	USH	Exon55	c.10859T>C	CBE	p.(Ile3620Thr)	missense	EAS	3
		1	USH	Exon55	c.10902_10903insG	N	p.(Thr3635Aspfs*2)	null (frameshift)	EAS	3
		1	USH	IVS56	c.11048-1G>T	N	p.(?)	splice	EAS	3
		3	USH	Exon57	c.11156G>A	ABE	p.(Arg3719His)	missense	EAS	3
		1	USH	Exon58	c.11273delG	N	p.(Ser3758Metfs*26)	null (frameshift)	EAS	3
		1	USH	Exon58	c.11295_11296insACATTGTT	N	p.(Gln3766fs)	null (frameshift)	EAS	3
		3	USH	IVS58	c.11389+1G>C	GBE	p.(?)	splice	EAS	3
		1	USH	Exon60	c.11560delG	N	p.(Val3854Leufs*30)	null (frameshift)	EAS	3
		1	USH	Exon61	c.11754G>A	ABE	p.(Trp3918*)	null (nonsense)	EAS	3
		1	USH	Exon61	c.11780A>G	CBE	p.(Asp3927Gly)	missense	EAS	3
		1	USH	Exon61	c.11795T>G	N	p.(Leu3932Arg)	missense	EAS	3
		1	USH	Exon62	c.12093C>G	GBE	p.(Tyr4031*)	null (nonsense)	EAS	3
		2	USH	Exon62	c.12104C>T	ABE	p.(Pro4035Leu)	missense	EAS	3
		1	USH	Exon62	c.12284G>A	ABE	p.(Gly4095Asp)	missense	EAS	3
		1	USH	Exon63	c.12361C>T	ABE	p.(Arg4121Cys)	missense	EAS	3
		1	USH	Exon63	c.12409delA	N	p.(Arg4137Glufs*30)	null (frameshift)	EAS	3
		1	USH	Exon63	c.12719T>G	N	p.(Ile4240Ser)	missense	EAS	3
		1	USH	Exon63	c.12752G>T	N	p.(Ser4251Ile)	missense	EAS	3
		1	USH	Exon63	c.12992A>G	CBE	p.(Tyr4331Cys)	missense	EAS	3
		2	USH	Exon63	c.13010C>T	ABE	p.(Thr4337Met)	missense	EAS	3
		1	USH	Exon63	c.13060_13063delGCTG	N	p.(Ala4354Leufs*18)	null (frameshift)	EAS	3
		1	USH	Exon63	c.13121T>A	N	p.(Val4374Glu)	missense	EAS	3
		1	USH	Exon63	c.13156A>T	N	p.(Ile4386Phe)	missense	EAS	3
		1	USH	Exon63	c.13262T>G	N	p.(Leu4421Arg)	missense	EAS	3
		1	USH	Exon63	c.13339A>G	CBE	p.(Met4447Val)	missense	EAS	3
		1	USH	Exon63	c.13514A>G	CBE	p.(Tyr4505Cys)	missense	EAS	3
		1	USH	Exon64	c.13822C>T	ABE	p.(Arg4608*)	null (nonsense)	EAS	3
		3	USH	Exon65	c.14287G>C	GBE	p.(Gly4763Arg)	missense	EAS	3
		1	USH	Exon66	c.14423G>A	ABE	p.(CTyrs4808Tyr)	missense	EAS	3
		1	USH	Exon66	c.14514G>T	N	p.(G4838Gly)	missense	EAS	3
		1	USH	Exon67	c.14667delG	N	p.(Leu4890Trpfs*18)	null (frameshift)	EAS	3
		1	USH	IVS67	c.14791+1G>A	ABE	p.(?)	splice	EAS	3
		1	USH	Exon68	c.14853G>C	GBE	p.(Trp4951Cys)	missense	EAS	3
		1	USH	Exon68	c.14911C>T	ABE	p.(Arg4971*)	null (nonsense)	EAS	3
		1	USH	Exon70	c.15104_15105del	N	p.(Thr5035Argfs*142)	null (frameshift)	EAS	3
		1	USH	Exon70	c.15178T>C	CBE	p.(Ser5060Pro)	missense	EAS	3
	1	1	USH	Exon38	c.7232A>C	N	p.(Gln2411Pro)	missense	EAS	4
	1	1	USH	IVS42	c.8559-2A>G	CBE	p.(Tyr2854_Arg2894del)	splice	EAS	4
	2	1	USH	Exon19	c.4217C>A	N	p.(Ser1406*)	null (nonsense)	EAS	4
	2	1	USH	Exon24	c.4894delG	N	p.(Ala1632Profs*3)	null (frameshift)	EAS	4
	3	1	USH	Exon63	c.12554delT	N	p.(Ile4185Lysfs*6)	null (frameshift)	EAS	4
	3	1	USH	Exon47	c.9319G>T	N	p.(Glu3107*)	null (nonsense)	EAS	4
	4	1	USH	Exon13	c.2802T>G	GBE*	p.(Cys934Trp)	missense	EAS	4
	4	1	USH	Exon61	c.11780A>G	CBE	p.(Asp3927Gly)	missense	EAS	4
	5	1	USH	Exon45	c.9002A>G	CBE	p.(Asn3001Ser)	missense	EAS	4
	5	1	USH	Exon13	c.2802T>G	GBE*	p.(Cys934Trp)	missense	EAS	4
	5	1	USH	Exon64	c.14017T>C	CBE	p.(Tyr4673His)	missense	EAS	4
	6	1	USH	Exon23	c.4821G>C	GBE	p.(Trp1607Cys)	missense	EAS	4
	6	1	USH	Exon43	c.8641_8642insTATT	N	p.(Ser2881Leufs*9)	null (frameshift)	EAS	4
	7	1	USH	Exon23	c.4821G>C	GBE	p.(Trp1607Cys)	missense	EAS	4
	7	1	USH	Exon43	c.8641_8642insTATT	N	p.(Ser2881Leufs*9)	null (frameshift)	EAS	4
	8	1	USH	Exon42	c.8232G>C	GBE	p.(Trp2744Cys)	missense	EAS	4
	8	1	USH	Exon41	c.7698T>A	N	p.(Tyr2566*)	null (nonsense)	EAS	4
	9	1	USH	Exon13	c.2802T>G	GBE*	p.(Cys934Trp)	missense	EAS	4
	9	1	USH	IVS59	c.11549-1G>T	N	p.(?)	splice	EAS	4
	10	1	USH	Exon64	c.14065delA	N	p.(Ile4689Serfs*10)	null (frameshift)	EAS	4
	10	1	USH	Exon63	c.13112_13115delAAAT	N	p.(Gln4371Argfs*19)	null (frameshift)	EAS	4
	11	1	USH	IVS56	c.11048-1G>T	N	p.(?)	splice	EAS	4
	11	1	USH	IVS25	c.5168-2_5168-1ins17	N	p.(?)	splice	EAS	4
	12	1	USH	Exon35	c.6661T>C	CBE	p.(Cys2221Arg)	missense	EAS	4
	12	1	USH	Exon3	c.538T>C	CBE	p.(Ser180Pro)	missense	EAS	4
	13	1	USH	Exon66	c.14350G>A	ABE	p.(Glu4784Lys)	missense	EAS	4
	13	1	USH	Exon63	c.13270T>C	CBE	p.(Cys4424Arg)	missense	EAS	4
	14	1	USH	Exon54	c.10712C>T	ABE	p.(Thr3571Met)	missense	EAS	4
	14	1	USH	Exon30	c.5976T>G	GBE*	p.(Tyr1992*)	null (nonsense)	EAS	4
	15	1	USH	Exon61	c.11762_11787del	N	p.(Ala3922Hisfs*16)	null (frameshift)	EAS	4
	15	1	USH	Exon47	Deletion Exon47	N	deletion	gross deletion	EAS	4
	16	1	USH	Exon66	c.14374C>T	ABE	p.(Leu4792Phe)	missense	EAS	4
	16	1	USH	Exon63	c.13465G>A	ABE	p.(Gly4489Ser)	missense	EAS	4
	17	1	USH	Exon3	c.510T>A	N	p.(Asp170Glu)	missense	EAS	4
	17	1	USH	Exon6	c.1000C>T	ABE	p.(Arg334Trp)	missense	EAS	4
	18	1	USH	Exon21	c.4517_4518delAG	N	p.(Glu1506Valfs*23)	null (frameshift)	EAS	4
	18	1	USH	Exon42	c.8232G>C	GBE	p.(Trp2744Cys)	missense	EAS	4
	19	1	USH	Exon54	c.10695T>A	N	p.(Tyr3565*)	null (nonsense)	EAS	4
	19	1	USH	Exon2	c.449T>G	N	p.(Leu150*)	null (nonsense)	EAS	4
	20	1	USH	IVS42	c.8559-2A>G	CBE	p.(Tyr2854_Arg2894del)	splice	EAS	4
	20	1	USH	Exon19	c.4124C>T	ABE	p.(Ser1375Leu)	missense	EAS	4
	21	1	USH	IVS42	c.8559-2A>G	CBE	p.(Tyr2854_Arg2894del)	splice	EAS	4
	21	1	USH	Exon57	c.11156G>A	ABE	p.(Arg3719His)	missense	EAS	4
	22	1	USH	Exon2	c.99_100insT	N	p.(Arg34Serfs*41)	null (frameshift)	EAS	4
	22	1	USH	Exon2	c.99_100insT	N	p.(Arg34Serfs*41)	null (frameshift)	EAS	4
	23	1	USH	IVS42	c.8559-2A>G	CBE	p.(Tyr2854_Arg2894del)	splice	EAS	4
	23	1	USH	Exon55	c.10859T>C	CBE	p.(Ile3620Thr)	missense	EAS	4
	24	1	USH	Exon66	c.14426C>T	ABE	p.(Thr4809Ile)	missense	EAS	4
	24	1	USH	Exon14	c.2914T>G	N	p.(Cys972Gly)	missense	EAS	4
	25	1	USH	IVS42	c.8559-2A>G	CBE	p.(Tyr2854_Arg2894del)	splice	EAS	4
	25	1	USH	IVS42	c.8559-2A>G	CBE	p.(Tyr2854_Arg2894del)	splice	EAS	4
	26	1	USH	Exon13	c.2802T>G	GBE*	p.(Cys934Trp)	missense	EAS	4
	26	1	USH	Exon5	c.802G>A	ABE	p.(Gly268Arg)	missense	EAS	4
	27	1	USH	Exon48	c.9469C>T	ABE	p.(Gln3157*)	null (nonsense)	EAS	4
	27	1	USH	IVS42	c.8559-2A>G	CBE	p.(Tyr2854_Arg2894del)	splice	EAS	4
	28	1	USH	Exon61	c.11806A>C	N	p.(Thr3936Pro)	missense	EAS	4
	28	1	USH	Exon61	c.11806A>C	N	p.(Thr3936Pro)	missense	EAS	4
	29	1	USH	IVS42	c.8559-2A>G	CBE	p.(Tyr2854_Arg2894del)	splice	EAS	4
	29	1	USH	Exon35	c.6741delC	N	p.(Ala2249Profs*30)	null (frameshift)	EAS	4
	30	1	USH	Exon51	c.10049dupA	N	p.(Asn3351Glufs*2)	null (frameshift)	EAS	4
	30	1	USH	Exon42	c.8232G>C	GBE	p.(Trp2744Cys)	missense	EAS	4
	31	1	USH	Exon61	c.11865G>A	ABE	p.(Trp3955*)	null (nonsense)	EAS	4
	31	1	USH	Exon27	c.5329C>T	ABE	p.(Arg1777Trp)	missense	EAS	4
	32	1	USH	Exon50	c.9958G>T	N	p.(Gly3320Cys)	missense	EAS	4
	32	1	USH	Exon42	c.8284C>G	GBE	p.(Pro2762Ala)	missense	EAS	4
	32	1	USH	Exon3	c.538T>C	CBE	p.(Ser180Pro)	missense	EAS	4
	33	1	USH	Exon63	c.13010C>T	ABE	p.(Thr4337Met)	missense	EAS	4
	33	1	USH	Exon54	c.10712C>T	ABE	p.(Thr3571Met)	missense	EAS	4
	34	1	USH	IVS42	c.8559-2A>G	CBE	p.(Tyr2854_Arg2894del)	splice	EAS	4
	34	1	USH	Exon2	c.80C>A	N	p.(Ser27*)	null (nonsense)	EAS	4
	35	1	USH	Exon22	c.4685C>A	N	p.(Ser1562*)	null (nonsense)	EAS	4
	35	1	USH	Exon13	c.2802T>G	GBE*	p.(Cys934Trp)	missense	EAS	4
	36	1	USH	IVS42	c.8559-2A>G	CBE	p.(Tyr2854_Arg2894del)	splice	EAS	4
	36	1	USH	Exon57	c.11156G>A	ABE	p.(Arg3719His)	missense	EAS	4
	37	1	RP	Exon66	c.14404T>C	CBE	p.(Ser4802Pro)	missense	EAS	4
	37	1	RP	Exon70	c.15178T>C	CBE	p.(Ser5060Pro)	missense	EAS	4
	38	1	RP	Exon13	c.2802T>G	GBE*	p.(Cys934Trp)	missense	EAS	4
	38	1	RP	Exon17	c.3544T>C	CBE	p.(Tyr1182His)	missense	EAS	4
	39	1	RP	IVS42	c.8559-2A>G	CBE	p.(Tyr2854_Arg2894del)	splice	EAS	4
	39	1	RP	Exon66	c.14350G>A	ABE	p.(Glu4784Lys)	missense	EAS	4
	40	1	RP	IVS42	c.8559-2A>G	CBE	p.(Tyr2854_Arg2894del)	splice	EAS	4
	40	1	RP	Exon53	c.10417G>A	ABE	p.(Glu3473Lys)	missense	EAS	4
	41	1	RP	Exon63	c.13643T>A	N	p.(Ile4548Asn)	missense	EAS	4
	41	1	RP	Exon28	c.5608C>T	ABE	p.(Arg1870Trp)	missense	EAS	4
	42	1	RP	Exon53	c.10505T>A	N	p.(Val3502Glu)	missense	EAS	4
	42	1	RP	Exon57	c.11156G>A	ABE	p.(Arg3719His)	missense	EAS	4
	43	1	RP	IVS42	c.8559-2A>G	CBE	p.(Tyr2854_Arg2894del)	splice	EAS	4
	43	1	RP	Exon54	c.10601A>G	CBE	p.(Tyr3534Cys)	missense	EAS	4
	44	1	RP	Exon13	c.2802T>G	GBE*	p.(Cys934Trp)	missense	EAS	4
	44	1	RP	Exon41	c.8002G>T	N	p.(Glu2668*)	null (nonsense)	EAS	4
	45	1	RP	Exon66	c.14354G>T	N	p.(Gly4785Val)	missense	EAS	4
	45	1	RP	Exon10	c.1824dupT	N	p.(Glu609*)	null (nonsense)	EAS	4
	46	1	RP	Exon27	c.5485C>T	ABE	p.(Gln1829*)	null (nonsense)	EAS	4
	46	1	RP	Exon13	c.2802T>G	GBE*	p.(Cys934Trp)	missense	EAS	4
	47	1	RP	Exon55	c.10859T>C	CBE	p.(Ile3620Thr)	missense	EAS	4
	47	1	RP	IVS42	c.8559-2A>G	CBE	p.(Tyr2854_Arg2894del)	splice	EAS	4
	48	1	RP	IVS42	c.8559-2A>G	CBE	p.(Tyr2854_Arg2894del)	splice	EAS	4
	48	1	RP	IVS32	c.6325+1G>A	ABE	p.(?)	splice	EAS	4
	49	1	RP	Exon58	c.11235C>G	GBE	p.(Tyr3745*)	null (nonsense)	EAS	4
	49	1	RP	Exon13	c.2802T>G	GBE*	p.(Cys934Trp)	missense	EAS	4
	50	1	RP	Exon2	c.100_101insT	N	p.(Arg34Leufs*41)	null (frameshift)	EAS	4
	50	1	RP	Exon47	c.9259G>A	ABE	p.(Val3087Ile)	missense	EAS	4
	51	1	RP	Exon13	c.2802T>G	GBE*	p.(Cys934Trp)	missense	EAS	4
	51	1	RP	IVS65	c.14343+5G>A	ABE	p.(?)	intron variant	EAS	4
	52	1	RP	IVS27	c.5572+1G>A	ABE	p.(?)	splice	EAS	4
	52	1	RP	IVS42	c.8559-2A>G	CBE	p.(Tyr2854_Arg2894del)	splice	EAS	4
	53	1	RP	Exon63	c.12580T>C	CBE	p.(Cys4194Arg)	missense	EAS	4
	53	1	RP	Exon49	c.9676C>T	ABE	p.(Arg3226*)	null (nonsense)	EAS	4
	54	1	RP	IVS42	c.8559-2A>G	CBE	p.(Tyr2854_Arg2894del)	splice	EAS	4
	54	1	RP	Exon13	c.2802T>G	GBE*	p.(Cys934Trp)	missense	EAS	4
	56	1	RP	Exon54	c.10712C>T	ABE	p.(Thr3571Met)	missense	EAS	4
	56	1	RP	IVS33	c.6485+5G>A	ABE	p.(?)	intron variant	EAS	4
	57	1	RP	Exon50	c.9958G>T	N	p.(Gly3320Cys)	missense	EAS	4
	57	1	RP	Exon42	c.8284C>G	GBE	p.(Pro2762Ala)	missense	EAS	4
	58	1	RP	Exon63	c.13339A>G	CBE	p.(Met4447Val)	missense	EAS	4
	58	1	RP	Exon2	c.99_100insT	N	p.(Arg34Serfs*41)	null (frameshift)	EAS	4
	59	1	RP	Exon70	c.15178T>C	CBE	p.(Ser5060Pro)	missense	EAS	4
	59	1	RP	IVS42	c.8559-2A>G	CBE	p.(Tyr2854_Arg2894del)	splice	EAS	4
	60	1	RP	Exon50	c.9958G>T	N	p.(Gly3320Cys)	missense	EAS	4
	60	1	RP	IVS42	c.8559-2A>G	CBE	p.(Tyr2854_Arg2894del)	splice	EAS	4
	60	1	RP	Exon13	c.2802T>G	GBE*	p.(Cys934Trp)	missense	EAS	4
	61	1	RP	IVS33	c.6485+5G>A	ABE	p.(?)	intron variant	EAS	4
	61	1	RP	Exon13	c.2802T>G	GBE*	p.(Cys934Trp)	missense	EAS	4
	62	1	RP	Exon42	c.8284C>G	GBE	p.(Pro2762Ala)	missense	EAS	4
	62	1	RP	IVS42	c.8559-2A>G	CBE	p.(Tyr2854_Arg2894del)	splice	EAS	4
	63	1	RP	IVS22	c.4758+3A>G	CBE	p.(?)	intron variant	EAS	4
	63	1	RP	IVS22	c.4758+3A>G	CBE	p.(?)	intron variant	EAS	4
	64	1	RP	Exon13	c.2802T>G	GBE*	p.(Cys934Trp)	missense	EAS	4
	64	1	RP	Exon13	c.2802T>G	GBE*	p.(Cys934Trp)	missense	EAS	4
	65	1	RP	Exon13	c.2802T>G	GBE*	p.(Cys934Trp)	missense	EAS	4
	65	1	RP	Exon65	c.14285A>G	CBE	p.(Asn4762Ser)	missense	EAS	4
	66	1	RP	Exon37	c.7068T>G	GBE*	p.(Asn2356Lys)	missense	EAS	4
	66	1	RP	Exon28	c.5608C>T	ABE	p.(Arg1870Trp)	missense	EAS	4
	67	1	RP	Exon37	c.7068T>G	GBE*	p.(Asn2356Lys)	missense	EAS	4
	67	1	RP	Exon37	c.7068T>G	GBE*	p.(Asn2356Lys)	missense	EAS	4
	68	1	RP	Exon70	c.15178T>C	CBE	p.(Ser5060Pro)	missense	EAS	4
	68	1	RP	IVS42	c.8559-2A>G	CBE	p.(Tyr2854_Arg2894del)	splice	EAS	4
	69	1	RP	Exon55	c.7569G>A	ABE	p.(Trp2523*)	null (nonsense)	EAS	4
	69	1	RP	Exon55	c.10859T>G	N	p.(Ile3620Thr)	missense	EAS	4
	1	1	USH	Exon3	c.538T>C	CBE	p.(Ser180Pro)	missense	EAS	5
	1	1	USH	Exon61	c.11714G>C	GBE	p.(Arg3905Pro)	missense	EAS	5
	3	1	RP	Exon2	c.142_143insGA	N	p.(Lys48Argfs*98)	null (frameshift)	EAS	5
	3	1	RP	Exon13	c.2802T>G	GBE*	p.(Cys934Trp)	missense	EAS	5
	17	1	USH	Exon57	c.11156G>A	ABE	p.(Arg3719His)	missense	EAS	5
	17	1	USH	Exon57	c.11156G>A	ABE	p.(Arg3719His)	missense	EAS	5
	21	1	USH	Exon19	c.4165delG	N	p.(Val1389Leufs*43)	null (frameshift)	EAS	5
	21	1	USH	Exon57	c.11156G>A	ABE	p.(Arg3719His)	missense	EAS	5
	27	1	USH	Exon22	c.4645C>T	ABE	p.(Arg1549*)	null (nonsense)	EAS	5
	27	1	USH	IVS42	c.8559-2A>G	CBE	p.(Tyr2854_Arg2894del)	splice	EAS	5
	37	1	RP	Exon8	c.1397G>T	N	p.(Gly466Val)	missense	EAS	5
	37	1	RP	Exon8	c.1397G>T	N	p.(Gly466Val)	missense	EAS	5
	49	1	USH	Exon4	c.656A>C	N	p.(His219Pro)	missense	EAS	5
	49	1	USH	Exon57	c.11208_11209insT	N	p.(Lys3737*)	null (nonsense)	EAS	5
	67	1	USH	Exon12	c.2017T>A	N	p.(Cys673Ser)	missense	EAS	5
	67	1	USH	Exon12	c.2017T>A	N	p.(Cys673Ser)	missense	EAS	5
	109	1	USH	IVS42	c.8559-2A>G	CBE	p.(Tyr2854_Arg2894del)	splice	EAS	5
	109	1	USH	Exon6	c.1143G>C	GBE	p.(Gln381His)	missense	EAS	5
	113	1	RP	Exon13	c.2802T>G	GBE*	p.(Cys934Trp)	missense	EAS	5
	113	1	RP	Exon21	c.4616C>T	ABE	p.(Thr1539Ile)	missense	EAS	5
	117	1	USH	Exon2	c.475C>T	ABE	p.(Gln159*)	null (nonsense)	EAS	5
	117	1	USH	IVS42	c.8559-2A>G	CBE	p.(Tyr2854_Arg2894del)	splice	EAS	5
	118	1	USH	Exon57	c.11156G>A	ABE	p.(Arg3719His)	missense	EAS	5
	118	1	USH	IVS42	c.8559-2A>G	CBE	p.(Tyr2854_Arg2894del)	splice	EAS	5
	146	1	USH	IVS42	c.8559-2A>G	CBE	p.(Tyr2854_Arg2894del)	splice	EAS	5
	146	1	USH	Exon66	c.14426C>T	ABE	p.(Thr4809Ile)	missense	EAS	5
	154	1	RP	Exon57	c.11156G>A	ABE	p.(Arg3719His)	missense	EAS	5
	154	1	RP	Exon50	c.9958G>T	N	p.(Gly3320Cys)	missense	EAS	5
	173	1	RP	Exon54	c.10588C>A	N	p.(Pro3530Thr)	missense	EAS	5
	173	1	RP	Exon63	c.13339A>G	CBE	p.(Met4447Val)	missense	EAS	5
	19114	1	RP	Exon66	c.14453C>T	ABE	p.(Pro4818Leu)	missense	EAS	6
	19114	1	RP	Exon38	c.7184_7194del	N	p.(Leu2395Hisfs*19)	null (frameshift)	EAS	6
	19162	1	RP	Exon25	c.5031_5047del	N	p.(His1677Glnfs*15)	null (frameshift)	EAS	6
	19162	1	RP	Exon63	c.13478G>A	ABE	p.(Arg4493His)	missense	EAS	6
	19123	1	RP	Exon22	c.4645C>T	ABE	p.(Arg1549*)	null (nonsense)	EAS	6
	19123	1	RP	IVS42	c.8559-2A>G	CBE	p.(Tyr2854_Arg2894del)	splice	EAS	6
	19178	1	RP	Exon2	c.100_101insT	N	p.(Arg34Leufs*41)	null (frameshift)	EAS	6
	19178	1	RP	Exon70	c.15178T>C	CBE	p.(Ser5060Pro)	missense	EAS	6
	19124	1	USH	Exon13	c.2802T>G	GBE*	p.(Cys934Trp)	missense	EAS	6
	19124	1	USH	Exon57	c.11156G>A	ABE	p.(Arg3719His)	missense	EAS	6
	2016060109	1	USH	IVS42	c.8559-2A>G	CBE	p.(Tyr2854_Arg2894del)	splice	EAS	7
	2016060109	1	USH	Exon21	c.4616C>T	ABE	p.(Thr1539Ile)	missense	EAS	7
	2016060112	1	RP	Exon70	c.15178T>C	CBE	p.(Ser5060Pro)	missense	EAS	7
	2016060112	1	RP	Exon13	c.2802T>G	GBE*	p.(Cys934Trp)	missense	EAS	7
	2016041901	1	USH	Exon63	c.13010C>T	ABE	p.(Thr4337Met)	missense	EAS	7
	2016041901	1	USH	Exon2	c.80C>A	N	p.(Ser27*)	null (nonsense)	EAS	7
	2016082403	1	RP?	Exon13	c.2802T>G	GBE*	p.(Cys934Trp)	missense	EAS	7
	2016082403	1	RP?	Exon13	c.2802T>G	GBE*	p.(Cys934Trp)	missense	EAS	7
	2016082406	1	RP?	Exon42	c.8284C>G	GBE	p.(Pro2762Ala)	missense	EAS	7
	2016082406	1	RP?	Exon22	c.4732C>T	ABE	p.(Arg1578Cys)	missense	EAS	7
	2016082904	1	RP?	Exon63	c.12560G>A	ABE	p.(Arg4187His)	missense	EAS	7
	2016082904	1	RP?	Exon28	c.5608C>T	ABE	p.(Arg1870Trp)	missense	EAS	7
	2016090201	1	RP	Exon13	c.2802T>G	GBE*	p.(Cys934Trp)	missense	EAS	7
	2016090201	1	RP	Exon13	c.2802T>G	GBE*	p.(Cys934Trp)	missense	EAS	7
	2016102412	1	RP?	Exon22	c.4685C>A	N	p.(Ser1562*)	null (nonsense)	EAS	7
	2016102412	1	RP?	Exon13	c.2802T>G	GBE*	p.(Cys934Trp)	missense	EAS	7
	2016103102	1	CORD	Exon61	c.11754G>A	ABE	p.(Trp3918*)	null (nonsense)	EAS	7
	2016103102	1	CORD	Exon13	c.2802T>G	GBE*	p.(Cys934Trp)	missense	EAS	7
	2016103103	1	USH	Exon57	c.11156G>A	ABE	p.(Arg3719His)	missense	EAS	7
	2016103103	1	USH	Exon11	c.1876C>T	ABE	p.(Arg626*)	null (nonsense)	EAS	7
	2016111406	1	CORD	Exon61	c.11865G>A	ABE	p.(Trp3955*)	null (nonsense)	EAS	7
	2016111406	1	CORD	Exon27	c.5329C>T	ABE	p.(Arg1777Trp)	missense	EAS	7
	2016112103	1	RP	Exon13	c.2802T>G	GBE*	p.(Cys934Trp)	missense	EAS	7
	2016112103	1	RP	Exon13	c.2802T>G	GBE*	p.(Cys934Trp)	missense	EAS	7
	2016112809	1	CORD	Exon63	c.12580T>C	CBE	p.(Cys4194Arg)	missense	EAS	7
	2016112809	1	CORD	Exon13	c.2802T>G	GBE*	p.(Cys934Trp)	missense	EAS	7
	2016112811	1	CORD	Exon64	c.13836C>A	N	p.(Cys4612*)	null (nonsense)	EAS	7
	2016112811	1	CORD	Exon37	c.7036_7057del	N	p.(His2346Phefs*7)	null (frameshift)	EAS	7
	2016112813	1	RP?	IVS42	c.8559-2A>G	CBE	p.(Tyr2854_Arg2894del)	splice	EAS	7
	2016112813	1	RP?	IVS42	c.8559-2A>G	CBE	p.(Tyr2854_Arg2894del)	splice	EAS	7
	2016112814	1	RP?	IVS42	c.8559-2A>G	CBE	p.(Tyr2854_Arg2894del)	splice	EAS	7
	2016112814	1	RP?	IVS42	c.8559-2A>G	CBE	p.(Tyr2854_Arg2894del)	splice	EAS	7
	2016121202	1	RP	Exon13	c.2802T>G	GBE*	p.(Cys934Trp)	missense	EAS	7
	2016121202	1	RP	Exon13	c.2802T>G	GBE*	p.(Cys934Trp)	missense	EAS	7
	2016121911	1	CORD	Exon55	c.10830G>C	GBE	p.(Trp3610Cys)	missense	EAS	7
	2016121911	1	CORD	Exon24	c.4948G>A	ABE	p.(Gly1650Arg)	missense	EAS	7
	2016121912	1	USH	Exon59	c.11533C>T	ABE	p.(Gln3845*)	null (nonsense)	EAS	7
	2016121912	1	USH	Exon54	c.10612C>T	ABE	p.(Arg3538*)	null (nonsense)	EAS	7
	2016121915	1	RP?	IVS42	c.8559-2A>G	CBE	p.(Tyr2854_Arg2894del)	splice	EAS	7
	2016121915	1	RP?	Exon18	c.3862G>T	N	p.(Glu1288*)	null (nonsense)	EAS	7
	2016122601	1	RP	Exon63	c.12580T>C	CBE	p.(Cys4194Arg)	missense	EAS	7
	2016122601	1	RP	Exon2	c.99_100insT	N	p.(Arg34Serfs*41)	null (frameshift)	EAS	7
	2017010403	1	RP?	Exon70	c.15178T>C	CBE	p.(Ser5060Pro)	missense	EAS	7
	2017010403	1	RP?	IVS42	c.8559-2A>G	CBE	p.(Tyr2854_Arg2894del)	splice	EAS	7
	2017010404	1	CORD	Exon55	c.10859T>C	CBE	p.(Ile3620Thr)	missense	EAS	7
	2017010404	1	CORD	Exon13	c.2802T>G	GBE*	p.(Cys934Trp)	missense	EAS	7
	2016091201	1	USH	IVS21	c.4627+1G>A	ABE	p.(?)	splice	EAS	7
	2016091201	1	USH	Exon13	c.2802T>G	GBE*	p.(Cys934Trp)	missense	EAS	7
	2016092601	1	RP	Exon61	c.11806A>C	N	p.(Thr3936Pro)	missense	EAS	7
	2016092601	1	RP	Exon3	c.538T>C	CBE	p.(Ser180Pro)	missense	EAS	7
	2016092605	1	RP	Exon63	c.13010C>T	ABE	p.(Thr4337Met)	missense	EAS	7
	2016092605	1	RP	Exon8	c.1397G>T	N	p.(Gly466Val)	missense	EAS	7
	2016092613	1	RP	IVS42	c.8559-2A>G	CBE	p.(Tyr2854_Arg2894del)	splice	EAS	7
	2016092613	1	RP	IVS42	c.8559-2A>G	CBE	p.(Tyr2854_Arg2894del)	splice	EAS	7
	2016101102	1	RP?	Exon31	c.6083A>G	CBE	p.(Tyr2028Cys)	missense	EAS	7
	2016101102	1	RP?	Exon13	c.2802T>G	GBE*	p.(Cys934Trp)	missense	EAS	7
	2016101006	1	RP	Exon66	c.14411G>A	ABE	p.(Gly4804Glu)	missense	EAS	7
	2016101006	1	RP	IVS42	c.8559-2A>G	CBE	p.(Tyr2854_Arg2894del)	splice	EAS	7
	2016101007	1	RP	IVS42	c.8559-2A>G	CBE	p.(Tyr2854_Arg2894del)	splice	EAS	7
	2016101007	1	RP	Exon17	c.3788G>A	ABE	p.(Trp1263*)	null (nonsense)	EAS	7
	2016101011	1	RP?	IVS42	c.8559-2A>G	CBE	p.(Tyr2854_Arg2894del)	splice	EAS	7
	2016101011	1	RP?	Exon41	c.8167C>T	ABE	p.(Arg2723*)	null (nonsense)	EAS	7
	2016101016	1	RP?	IVS42	c.8559-2A>G	CBE	p.(Tyr2854_Arg2894del)	splice	EAS	7
	2016101016	1	RP?	IVS42	c.8559-2A>G	CBE	p.(Tyr2854_Arg2894del)	splice	EAS	7
	2016101017	1	RP?	IVS42	c.8559-2A>G	CBE	p.(Tyr2854_Arg2894del)	splice	EAS	7
	2016101017	1	RP?	IVS42	c.8559-2A>G	CBE	p.(Tyr2854_Arg2894del)	splice	EAS	7
	2016101023	1	LCA	IVS42	c.8559-2A>G	CBE	p.(Tyr2854_Arg2894del)	splice	EAS	7
	2016101023	1	LCA	Exon33	c.6383G>A	ABE	p.(Cys2128Tyr)	missense	EAS	7
	2016101712	1	RP	Exon70	c.15178T>C	CBE	p.(Ser5060Pro)	missense	EAS	7
	2016101712	1	RP	Exon24	c.4957C>T	ABE	p.(Arg1653*)	null (nonsense)	EAS	7
	2016101720	1	RP	Exon65	c.14222C>T	ABE	p.(Pro4741Leu)	missense	EAS	7
	2016101720	1	RP	Exon51	c.10049dupA	N	p.(Asn3351Glufs*2)	null (frameshift)	EAS	7
	RD16100083	1	RP	IVS32	c.6325+1G>A	ABE	p.(?)	splice	EAS	8
	RD16100083	1	RP	Exon26	c.5200G>C	GBE	p.(Gly1734Arg)	missense	EAS	8
	RD16121768	1	USH	Exon58	c.11241_11242insTTAC	N	p.(Tyr3747Tyrfs*15)	null (frameshift)	EAS	8
	RD16121768	1	USH	Exon13	c.2802T>G	GBE*	p.(Cys934Trp)	missense	EAS	8
	RD16122951	1	USH	Exon72	c.15575_15579delAGGAA	N	p.(Lys5192Thrfs*48)	null (frameshift)	EAS	8
	RD16122951	1	USH	Exon48	c.9469C>T	ABE	p.(Gln3157*)	null (nonsense)	EAS	8
	RD16122952	1	USH	Exon72	c.15575_15579delAGGAA	N	p.(Lys5192Thrfs*48)	null (frameshift)	EAS	8
	RD16122952	1	USH	Exon72	c.15575_15579delAGGAA	N	p.(Lys5192Thrfs*48)	null (frameshift)	EAS	8
	R0161206600	1	USH	Exon37	c.7018_7019 delCA	N	p.(Gln2340Glyfs*16)	null (frameshift)	EAS	8
	R0161206600	1	USH	Exon23	c.4821G>C	GBE	p.(Trp1607Cys)	missense	EAS	8
	R0161206601	1	USH	Exon37	c.7018_7019 delCA	N	p.(Gln2340Glyfs*16)	null (frameshift)	EAS	8
	R0161206601	1	USH	Exon23	c.4821G>C	GBE	p.(Trp1607Cys)	missense	EAS	8
	R0161007602	1	USH	Exon37	c.7018_7019 delCA	N	p.(Gln2340Glyfs*16)	null (frameshift)	EAS	8
	R0161007602	1	USH	Exon23	c.4821G>C	GBE	p.(Trp1607Cys)	missense	EAS	8
	R0161206803	1	USH	Exon37	c.7018_7019 delCA	N	p.(Gln2340Glyfs*16)	null (frameshift)	EAS	8
	R0161206803	1	USH	Exon23	c.4821G>C	GBE	p.(Trp1607Cys)	missense	EAS	8
	R0161206604	1	USH	Exon37	c.7018_7019 delCA	N	p.(Gln2340Glyfs*16)	null (frameshift)	EAS	8
	R0161206604	1	USH	Exon23	c.4821G>C	GBE	p.(Trp1607Cys)	missense	EAS	8
	R0161006605	1	USH	Exon37	c.7018_7019 delCA	N	p.(Gln2340Glyfs*16)	null (frameshift)	EAS	8
	R0161006605	1	USH	Exon23	c.4821G>C	GBE	p.(Trp1607Cys)	missense	EAS	8
	RD17011488	1	USH	IVS42	c.8559-2A>G	CBE	p.(Tyr2854_Arg2894del)	splice	EAS	8
	RD17011488	1	USH	Exon32	c.6239_6240insA	N	p.(Lys2080fs*23)	null (frameshift)	EAS	8
	RD17020641	1	RP	IVS42	c.8559-2A>G	CBE	p.(Tyr2854_Arg2894del)	splice	EAS	8
	RD17020641	1		Exon13	c.2802T>G	GBE*	p.(Cys934Trp)	missense	EAS	8
	RD17021722	1	RP	Exon54	c.10733G>A	ABE	p.(Ser3578Asn)	missense	EAS	8
	RD17021722	1		IVS42	c.8559-2A>G	CBE	p.(Tyr2854_Arg2894del)	splice	EAS	8
	R0170400746	1	RP	Exon70	c.15178T>C	CBE	p.(Ser5060Pro)	missense	EAS	8
	R0170400746	1		Exon66	c.14404T>C	CBE	p.(Ser4802Pro)	missense	EAS	8
	RD17043134	1	RP	Exon65	c.14285A>T	N	p.(Asn4762Ile)	missense	EAS	8
	RD17043134	1		Exon64	c.14017T>C	CBE	p.(Tyr4673His)	missense	EAS	8
	RD17043134	1		Exon13	c.2802T>G	GBE*	p.(Cys934Trp)	missense	EAS	8
	RD17043137	1	RP	Exon70	c.15095G>A	ABE	p.(Ser5032Asn)	missense	EAS	8
	RD17043137	1		Exon67	c.14642G>C	GBE	p.(Ser4881Thr)	missense	EAS	8
	RD17050476	1	USH	Exon39	c.7399_7400insAATAACGCTCCTGGCTCTC	N	p.(Pro2467Glnfs*2)	null (frameshift)	EAS	8
	RD17050476	1	USH	IVS9	c.1644+4A>G	CBE	p.(?)	intron variant	EAS	8
	RD17050478	1	USH	Exon13	c.2802T>G	GBE*	p.(Cys934Trp)	missense	EAS	8
	RD17050478	1	USH	IVS9	c.1644+4A>G	CBE	p.(?)	intron variant	EAS	8
	RD17050721	1	RP	Exon43	c.8575C>T	ABE	p.(Arg2859Cys)	missense	EAS	8
	RD17050721	1		Exon42	c.8440G>A	ABE	p.(Val2814Ile)	missense	EAS	8
	RD17050879	1	USH	Exon42	c.8232G>C	GBE	p.(Trp2744Cys)	missense	EAS	8
	RD17050879	1	USH	Exon42	c.8232G>C	GBE	p.(Trp2744Cys)	missense	EAS	8
	RD1706090	1	USH	Exon42	c.8232G>C	GBE	p.(Trp2744Cys)	missense	EAS	8
	RD1706090	1	USH	Exon42	c.8232G>C	GBE	p.(Trp2744Cys)	missense	EAS	8
	RD1706066	1	USH	Exon48	c.9469C>T	ABE	p.(Gln3157*)	null (nonsense)	EAS	8
	RD1706066	1	USH	Exon37	c.7037A>G	CBE	p.(His2346Arg)	missense	EAS	8
	RD18060479	1	USH	Exon48	c.9469C>T	ABE	p.(Gln3157*)	null (nonsense)	EAS	8
	RD18060479	1	USH	Exon37	c.7037A>G	CBE	p.(His2346Arg)	missense	EAS	8
	RD18010625	1	USH	Exon63	c.12790G>A	ABE	p.(Glu4264Lys)	missense	EAS	8
	RD18010625	1	USH	IVS42	c.8559-2A>G	CBE	p.(Tyr2854_Arg2894del)	splice	EAS	8
	R017100493	1	RP	Exon13	c.2802T>G	GBE*	p.(Cys934Trp)	missense	EAS	8
	R017100493	1		IVS63	c.13811+1delG	N	p.(?)	splice	EAS	8
	R017060523	1	USH	Exon42	c.8284C>G	GBE	p.(Pro2762Ala)	missense	EAS	8
	R017060523	1	USH	Exon50	c.9958G>T	N	p.(Gly3320Cys)	missense	EAS	8
	R017060523	1	USH	Exon63	c.13040_13062delinsTCAGAAGTCA	N	p.(Thr4347Ifs*22)	null (frameshift)	EAS	8
	R017100416	1	RP	Exon63	c.13465G>A	ABE	p.(Gly4489Ser)	missense	EAS	8
	R017100416	1		Exon52	c.10190_10191delAA	N	p.(Lys3397Argfs*20)	null (frameshift)	EAS	8
	R018090252	1	USH	Exon29	c.5836C>T	ABE	p.(Arg1946*)	null (nonsense)	EAS	8
	R018090252	1	USH	Exon13	c.2802T>G	GBE*	p.(Cys934Trp)	missense	EAS	8
	R017090333	1	USH	IVS42	c.8559-2A>G	CBE	p.(Tyr2854_Arg2894del)	splice	EAS	8
	R017090333	1	USH	Exon16	c.3314A>C	N	p.(Tyr1105Ser)	missense	EAS	8
	RD18050819	1	RP	Exon63	c.12790G>A	ABE	p.(Glu4264Lys)	missense	EAS	8
	RD18050819	1		Exon60	c.11549-5del	N	p.(?)	intron variant	EAS	8
	RD18050819	1		Exon37	c.6998T>C	CBE	p.(Val2333Ala)	missense	EAS	8
	RD18050569	1	USH	Exon53	c.10576C>T	ABE	p.(Gln3526*)	null (nonsense)	EAS	8
	RD18050569	1	USH	IVS42	c.8559-2A>G	CBE	p.(Tyr2854_Arg2894del)	splice	EAS	8
	RD17090325	1	USH	Exon65	c.14223_14224insC	N	p.(Thr4742Hisfs*38)	null (frameshift)	EAS	8
	RD17090325	1	USH	IVS38	c.7300+1G>T	N	p.(?)	splice	EAS	8
	R017090110	1	RP	Exon57	c.11156G>A	ABE	p.(Arg3719His)	missense	EAS	8
	R017090110	1		Exon13	c.2802T>G	GBE*	p.(Cys934Trp)	missense	EAS	8
	RD18050019	1	USH	IVS42	c.8559-2A>G	CBE	p.(Tyr2854_Arg2894del)	splice	EAS	8
	RD18050019	1	USH	Exons17-21	Deletion Exon 17_21	N	deletion	copy number variation	EAS	8
	RD18080622	1	RP	Exon60	c.11683G>A	ABE	p.(Gly3895Arg)	missense	EAS	8
	RD18080622	1		Exon49	c.9593A>G	CBE	p.(Tyr3198Cys)	missense	EAS	8
	R017070069	1	USH	Exon3	c.538T>C	CBE	p.(Ser180Pro)	missense	EAS	8
	R017070069	1	USH	Exon2	c.99_100insT	N	p.(Arg34Serfs*41)	null (frameshift)	EAS	8
	RD17120980	1	RP	Exon50	c.9915G>C	GBE	p.(Glu3305Asp)	missense	EAS	8
	RD17120980	1		Exon37	c.7068T>G	GBE*	p.(Asn2356Lys)	missense	EAS	8
	R01706066	1	RP	Exon13	c.2802T>G	GBE*	p.(Cys934Trp)	missense	EAS	8
	R01706066	1		Exon14	c.2855C>G	GBE	p.(Ser952*)	null (nonsense)	EAS	8
	RD17061067	1	RP	Exon57	c.11156G>A	ABE	p.(Arg3719His)	missense	EAS	8
	RD17061067	1		Exon57	c.11156G>A	ABE	p.(Arg3719His)	missense	EAS	8
	RD17061138	1	USH	Exon48	c.9469C>T	ABE	p.(Gln3157*)	null (nonsense)	EAS	8
	RD17061138	1	USH	IVS32	c.6325+1G>A	ABE	p.(?)	splice	EAS	8
	RD17072130	1	RP	Exon55	c.10859T>C	CBE	p.(Ile3620Thr)	missense	EAS	8
	RD17072130	1		Exon31	c.6071C>T	ABE	p.(Pro2024Leu)	missense	EAS	8
	RD17080296	1	USH	Exon63	c.13202G>A	ABE	p.(Gly4401Asp)	missense	EAS	8
	RD17080296	1	USH	IVS42	c.8559-2A>G	CBE	p.(Tyr2854_Arg2894del)	splice	EAS	8
	RD17080296	1	USH	Exon17	c.3788G>A	ABE	p.(Trp1263*)	null (nonsense)	EAS	8
	RD17080301	1	RP	Exon63	c.12790G>A	ABE	p.(Glu4264Lys)	missense	EAS	8
	RD17080301	1		Exon57	c.11198_11199insA	N	p.(Asn3733Lysfs*4)	null (frameshift)	EAS	8
	RD17082179	1	RP	Exon13	c.2802T>G	GBE*	p.(Cys934Trp)	missense	EAS	8
	RD17082179	1		IVS12	c.2168-1G>C	GBE	p.(?)	splice	EAS	8
	RD17091313	1	USH	Exon18	c.3883C>T	ABE	p.(Arg1295*)	null (nonsense)	EAS	8
	RD17091313	1	USH	Exon2	c.99_100insT	N	p.(Arg34Serfs*41)	null (frameshift)	EAS	8
	RD17094479	1	RP	Exon63	c.13465G>A	ABE	p.(Gly4489Ser)	missense	EAS	8
	RD17094479	1		Exon13	c.2802T>G	GBE*	p.(Cys934Trp)	missense	EAS	8
	DP17100401	1	RP	IVS42	c.8559-2A>G	CBE	p.(Tyr2854_Arg2894del)	splice	EAS	8
	DP17100401	1		Exon13	c.2802T>G	GBE*	p.(Cys934Trp)	missense	EAS	8
	RD17101069	1	USH	Exon32	c.6310_6325delAACTACATAGTCACAG	N	p.(Asn2104Ilefs*2)	null (frameshift)	EAS	8
	RD17101069	1	USH	Exon13	c.2802T>G	GBE*	p.(Cys934Trp)	missense	EAS	8
	RD17101995	1	RP	IVS42	c.8559-2A>G	CBE	p.(Tyr2854_Arg2894del)	splice	EAS	8
	RD17101995	1		Exon13	c.2802T>G	GBE*	p.(Cys934Trp)	missense	EAS	8
	RD17110028	1	USH	IVS59	c.11548+1G>A	ABE	p.(?)	splice	EAS	8
	RD17110028	1	USH	IVS42	c.8559-2A>G	CBE	p.(Tyr2854_Arg2894del)	splice	EAS	8
	RD17110186	1	RP	Exon63	c.13339A>G	CBE	p.(Met4447Val)	missense	EAS	8
	RD17110186	1		Exon13	c.2653C>T	ABE	p.(His885Tyr)	missense	EAS	8
	RD17111447	1	RP	Exon63	c.13502C>A	N	p.(Pro4501Gln)	missense	EAS	8
	RD17111447	1		Exon61	c.11864G>A	ABE	p.(Trp3955*)	null (nonsense)	EAS	8
	RD17111461	1	USH	Exon63	c.12560G>A	ABE	p.(Arg4187His)	missense	EAS	8
	RD17111461	1	USH	Exon10	c.1724G>A	ABE	p.(Cys575Tyr)	missense	EAS	8
	RD17113982	1	RP	Exon63	c.13480T>C	CBE	p.(Tyr4494His)	missense	EAS	8
	RD17113982	1		Exon63	c.13339A>G	CBE	p.(Met4447Val)	missense	EAS	8
	RD17123978	1	USH	Exon48	c.9469C>T	ABE	p.(Gln3157*)	null (nonsense)	EAS	8
	RD17123978	1		Exon23	c.4818_4819insA	N	p.(Lys1606Lysfs*4)	null (frameshift)	EAS	8
	RD17124982	1	RP	Exon63	c.13004C>A	N	p.(Ala4335Asp)	missense	EAS	8
	RD17124982	1		Exon41	c.8095C>T	ABE	p.(Arg2699Trp)	missense	EAS	8
	RD17124002	1	USH	Exon64	c.14065delA	N	p.(Ile4689Serfs*10)	null (frameshift)	EAS	8
	RD17124002	1	USH	Exon35	c.6661T>C	CBE	p.(Cys2221Arg)	missense	EAS	8
	RD17124989	1	USH	Exon64	c.14065delA	N	p.(Ile4689Serfs*10)	null (frameshift)	EAS	8
	RD17124989	1	USH	Exon35	c.6661T>C	CBE	p.(Cys2221Arg)	missense	EAS	8
	RD17124003	1	RP	Exon36	c.6929C>T	ABE	p.(Thr2310Met)	missense	EAS	8
	RD17124003	1		Exon10	c.1757A>C	N	p.(Tyr586Ser)	missense	EAS	8
	RD17125000	1	USH	IVS42	c.8559-2A>G	CBE	p.(Tyr2854_Arg2894del)	splice	EAS	8
	RD17125000	1	USH	Exon3	c.538T>C	CBE	p.(Ser180Pro)	missense	EAS	8
	RD17126053	1	RP	Exon52	c.10331G>A	ABE	p.(Cys3444Tyr)	missense	EAS	8
	RD17126053	1		IVS42	c.8559-2A>G	CBE	p.(Tyr2854_Arg2894del)	splice	EAS	8
	RD18010305	1	RP	Exon63	c.12752G>T	N	p.(Ser4251Ile)	missense	EAS	8
	RD18010305	1		Exon43	c.8641_8642insTATT	N	p.(Ser2881Leufs*9)	null (frameshift)	EAS	8
	RD18010588	1	RP	Exon26	c.5204G>A	ABE	p.(Gly1735Glu)	missense	EAS	8
	RD18010588	1		Exon13	c.2802T>G	GBE*	p.(Cys934Trp)	missense	EAS	8
	RD18012919	1	RP	Exon50	c.9958G>T	N	p.(Gly3320Cys)	missense	EAS	8
	RD18012919	1		IVS42	c.8559-2A>G	CBE	p.(Tyr2854_Arg2894del)	splice	EAS	8
	RD18012919	1		Exon42	c.8284C>G	GBE	p.(Pro2762Ala)	missense	EAS	8
	RD18012995	1	USH	Exon61	c.11806A>C	N	p.(Thr3936Pro)	missense	EAS	8
	RD18012995	1	USH	IVS12	c.2167+1G>A	ABE	p.(?)	splice	EAS	8
	RD18021256	1	USH	Exon63	c.13202G>A	ABE	p.(Gly4401Asp)	missense	EAS	8
	RD18021256	1	USH	Exon17	c.3788G>A	ABE	p.(Trp1263*)	null (nonsense)	EAS	8
	RD18021276	1	RP	Exon49	c.9699delT	N	p.(His3234Ilefs*67)	null (frameshift)	EAS	8
	RD18021276	1		Exon13	c.2802T>G	GBE*	p.(Cys934Trp)	missense	EAS	8
	RD18034505	1	USH	Exon42	c.8232G>C	GBE	p.(Trp2744Cys)	missense	EAS	8
	RD18034505	1	USH	IVS41	c.8224-1G>C	GBE	p.(?)	splice	EAS	8
	RD18036958	1	USH	IVS58	c.11389+1G>C	GBE	p.(?)	splice	EAS	8
	RD18036958	1	USH	Exon42	c.8232G>C	GBE	p.(Trp2744Cys)	missense	EAS	8
	RD18040300	1	RP	Exon55	c.10859T>C	CBE	p.(Ile3620Thr)	missense	EAS	8
	RD18040300	1		Exon54	c.10712C>T	ABE	p.(Thr3571Met)	missense	EAS	8
	RD18040317	1	USH	Exon63	c.13121T>A	N	p.(Val4374Glu)	missense	EAS	8
	RD18040317	1	USH	Exon63	c.12361C>T	ABE	p.(Arg4121Cys)	missense	EAS	8
	RD18040329	1	USH	IVS42	c.8559-2A>G	CBE	p.(Tyr2854_Arg2894del)	splice	EAS	8
	RD18040329	1	USH	Exon5	c.802G>A	ABE	p.(Gly268Arg)	missense	EAS	8
	RD18041215	1	USH	Exon60	c.11648T>C	CBE	p.(Ile3883Thr)	missense	EAS	8
	RD18041215	1	USH	IVS42	c.8559-2A>G	CBE	p.(Tyr2854_Arg2894del)	splice	EAS	8
	RD18041215	1	USH	Exon4	c.769G>A	ABE	p.(Gly257Arg)	missense	EAS	8
	RD18043350	1	USH	Exon22	c.4645C>T	ABE	p.(Arg1549*)	null (nonsense)	EAS	8
	RD18043350	1	USH	Exon13	c.2802T>G	GBE*	p.(Cys934Trp)	missense	EAS	8
	RD18043350	1	USH	Exon13	c.2653C>T	ABE	p.(His885Tyr)	missense	EAS	8
	RD18043388	1	USH	IVS32	c.6325+1G>A	ABE	p.(?)	splice	EAS	8
	RD18043388	1	USH	Exon17	c.3667T>C	CBE	p.(Cys1223Arg)	missense	EAS	8
	RD18043388	1	USH	Exon6	c.905G>A	ABE	p.(Cys302Tyr)	missense	EAS	8
	RD18071376	1	USH	IVS32	c.6325+1G>A	ABE	p.(?)	splice	EAS	8
	RD18071376	1	USH	Exon17	c.3667T>C	CBE	p.(Cys1223Arg)	missense	EAS	8
	RD18071376	1	USH	Exon6	c.905G>A	ABE	p.(Cys302Tyr)	missense	EAS	8
	RD1805172	1	USH	Exon2	c.99_100insT	N	p.(Arg34Serfs*41)	null (frameshift)	EAS	8
	RD1805172	1	USH	Exon2	c.99_100insT	N	p.(Arg34Serfs*41)	null (frameshift)	EAS	8
	RD18184100	1	USH	Exon68	c.14876G>T	N	p.(Gly4959Val)	missense	EAS	8
	RD18184100	1	USH	Exon18	c.3829G>T	N	p.(Glu1277*)	null (nonsense)	EAS	8
	RD18184118	1	USH	Exon61	c.11994C>A	N	p.(Tyr3998*)	null (nonsense)	EAS	8
	RD18184118	1	USH	Exon25	c.5152C>T	ABE	p.(Gln1718*)	null (nonsense)	EAS	8
	RD18184129	1	USH	Exon66	c.14404T>C	CBE	p.(Ser4802Pro)	missense	EAS	8
	RD18184129	1	USH	Exon63	c.13510G>T	N	p.(Glu4504*)	null (nonsense)	EAS	8
	RD18070019	1	RP	Exon63	c.13202G>A	ABE	p.(Gly4401Asp)	missense	EAS	8
	RD18070019	1		Exon25	c.5162G>A	ABE	p.(Gly1721Glu)	missense	EAS	8
	RD18070019	1		Exon17	c.3788G>A	ABE	p.(Trp1263*)	null (nonsense)	EAS	8
	RD18071422	1	RP	Exon63	c.13465G>A	ABE	p.(Gly4489Ser)	missense	EAS	8
	RD18071422	1		Exon45	c.9022_9023insA	N	p.(Ser3008Lysfs*45)	null (frameshift)	EAS	8
	RD18073491	1	RP	Exon63	c.12697T>C	CBE	p.(Trp4233Arg)	missense	EAS	8
	RD18073491	1		Exon19	c.4124C>T	ABE	p.(Ser1375Leu)	missense	EAS	8
	RD18073538	1	USH	IVS42	c.8559-2A>G	CBE	p.(Tyr2854_Arg2894del)	splice	EAS	8
	RD18073538	1	USH	IVS32	c.6325+1G>A	ABE	p.(?)	splice	EAS	8
	RD18113679	1	USH	Exon68	c.14792_14793insT	N	p.(Leu4931Phefs*23)	null (frameshift)	EAS	8
	RD18113679	1	USH	Exon13	c.2802T>G	GBE*	p.(Cys934Trp)	missense	EAS	8
	RD18113666	1	RP	Exon50	c.9958G>T	N	p.(Gly3320Cys)	missense	EAS	8
	RD18113666	1		Exon42	c.8284C>G	GBE	p.(Pro2762Ala)	missense	EAS	8
	RD18113666	1		Exon18	c.4021G>C	GBE	p.(Ala1341Pro)	missense	EAS	8
	RD18102634	1	RP	Exon66	c.14570G>T	N	p.(Gly4857Val)	missense	EAS	8
	RD18102634	1		IVS12	c.2167+5G>A	ABE	p.(?)	intron variant	EAS	8
	RD18102634	1		Exon3	c.503C>T	ABE	p.(Thr168Ile)	missense	EAS	8
	RD18093274	1	USH	Exon50	c.9958G>T	N	p.(Gly3320Cys)	missense	EAS	8
	RD18093274	1	USH	Exon49	c.9676C>T	ABE	p.(Arg3226*)	null (nonsense)	EAS	8
	RD18093274	1	USH	Exon42	c.8284C>G	GBE	p.(Pro2762Ala)	missense	EAS	8
	RD18100638	1	USH	Exon50	c.9958G>T	N	p.(Gly3320Cys)	missense	EAS	8
	RD18100638	1	USH	Exon49	c.9676C>T	ABE	p.(Arg3226*)	null (nonsense)	EAS	8
	RD18100638	1	USH	Exon42	c.8284C>G	GBE	p.(Pro2762Ala)	missense	EAS	8
	RD18100639	1	USH	Exon50	c.9958G>T	N	p.(Gly3320Cys)	missense	EAS	8
	RD18100639	1	USH	Exon49	c.9676C>T	ABE	p.(Arg3226*)	null (nonsense)	EAS	8
	RD18100639	1	USH	Exon42	c.8284C>G	GBE	p.(Pro2762Ala)	missense	EAS	8
	RD1808689	1	USH	IVS42	c.8559-2A>G	CBE	p.(Tyr2854_Arg2894del)	splice	EAS	8
	RD1808689	1	USH	IVS32	c.6325+1G>A	ABE	p.(?)	splice	EAS	8
	RD1808628	1	USH	Exon57	c.11156G>A	ABE	p.(Arg3719His)	missense	EAS	8
	RD1808628	1	USH	Exon2	c.99_100insT	N	p.(Arg34Serfs*41)	null (frameshift)	EAS	8
	RD180882-1	1	USH	Exon57	c.11156G>A	ABE	p.(Arg3719His)	missense	EAS	8
	RD180882-1	1	USH	Exon2	c.99_100insT	N	p.(Arg34Serfs*41)	null (frameshift)	EAS	8
	RD1808397	1	USH	IVS58	c.11389+1G>C	GBE	p.(?)	splice	EAS	8
	RD1808397	1	USH	Exon13	c.2802T>G	GBE*	p.(Cys934Trp)	missense	EAS	8
	RD1808398	1	RP	Exon13	c.2802T>G	GBE*	p.(Cys934Trp)	missense	EAS	8
	RD1808398	1		Exon13	c.2802T>G	GBE*	p.(Cys934Trp)	missense	EAS	8
	RD1808135	1	RP	Exon13	c.2802T>G	GBE*	p.(Cys934Trp)	missense	EAS	8
	RD1808135	1		Exon3	c.538T>C	CBE	p.(Ser180Pro)	missense	EAS	8
	RD1808168	1	USH	IVS58	c.11389+1G>C	GBE	p.(?)	splice	EAS	8
	RD1808168	1	USH	Exon46	c.9244A>G	CBE	p.(Ile3082Val)	missense	EAS	8
	RD1808168	1	USH	Exon26	c.5264_5265insT	N	p.(Val1756Argfs*3)	null (frameshift)	EAS	8
	RD1808136	1	RP	Exon63	c.13546G>T	N	p.(Gly4516Trp)	missense	EAS	8
	RD1808136	1		Exon13	c.2802T>G	GBE*	p.(Cys934Trp)	missense	EAS	8
	RD1808174	1	RP	Exon63	c.13546G>T	N	p.(Gly4516Trp)	missense	EAS	8
	RD1808174	1		Exon13	c.2802T>G	GBE*	p.(Cys934Trp)	missense	EAS	8
	RD1808401	1	RP	Exon72	c.15520-1G>A	ABE	p.(?)	splice	EAS	8
	RD1808401	1		Exon52	c.10331G>A	ABE	p.(Cys3444Tyr)	missense	EAS	8
	RD1904004	1	RP	Exon59	c.11520_11523del	N	p.(Tyr3840*fs1)	null (frameshift)	EAS	8
	RD1904004	1		Exon50	c.9801C>G	GBE	p.(Cys3267Trp)	missense	EAS	8
	RD190332	1	USH	Exon69	c.15017C>T	ABE	p.(Thr5006Met)	missense	EAS	8
	RD190332	1	USH	Exon6	c.1143+2T>C	CBE	p.(?)	splice	EAS	8
	RD19033252	1	USH	Exon52	c.10342G>A	ABE	p.(Glu3448Lys)	missense	EAS	8
	RD19033252	1	USH	Exon28	c.5581G>A	ABE	p.(Gly1861Ser)	missense	EAS	8
	RD18102594	1	USH	IVS42	c.8559-2A>G	CBE	p.(Tyr2854_Arg2894del)	splice	EAS	8
	RD18102594	1	USH	IVS42	c.8559-2A>G	CBE	p.(Tyr2854_Arg2894del)	splice	EAS	8
	RD18102620	1	RP	Exon71	c.15427C>T	ABE	p.(Arg5143Cys)	missense	EAS	8
	RD18102620	1		Exon37	c.7068T>G	GBE*	p.(Asn2356Lys)	missense	EAS	8
	RD18110234	1	RP	Exon56	c.10962C>A	N	p.(Tyr3654*)	null (nonsense)	EAS	8
	RD18110234	1		Exon13	c.2802T>G	GBE*	p.(Cys934Trp)	missense	EAS	8
	RD18110238	1	RP	Exon65	c.14287G>C	GBE	p.(Gly4763Arg)	missense	EAS	8
	RD18110238	1		Exon13	c.2802T>G	GBE*	p.(Cys934Trp)	missense	EAS	8
	RD18125239	1	RP	Exon70	c.15178T>C	CBE	p.(Ser5060Pro)	missense	EAS	8
	RD18125239	1		Exon57	c.11156G>A	ABE	p.(Arg3719His)	missense	EAS	8
	RD18125290	1	RP	Exon21	c.4616C>T	ABE	p.(Thr1539Ile)	missense	EAS	8
	RD18125290	1		Exon21	c.4616C>T	ABE	p.(Thr1539Ile)	missense	EAS	8
	RD18125302	1	RP	Exon70	c.15178T>C	CBE	p.(Ser5060Pro)	missense	EAS	8
	RD18125302	1		Exon52	c.10331G>A	ABE	p.(Cys3444Tyr)	missense	EAS	8
	RD19022752	1	RP	Exon57	c.11156G>A	ABE	p.(Arg3719His)	missense	EAS	8
	RD19022752	1		Exon48	c.9469C>T	ABE	p.(Gln3157*)	null (nonsense)	EAS	8
	RD19022753	1	RP	Exon48	c.9469C>T	ABE	p.(Gln3157*)	null (nonsense)	EAS	8
	RD19022753	1		Exon13	c.2802T>G	GBE*	p.(Cys934Trp)	missense	EAS	8
	RD19022795	1	RP	Exon57	c.11156G>A	ABE	p.(Arg3719His)	missense	EAS	8
	RD19022795	1		IVS42	c.8559-2A>G	CBE	p.(Tyr2854_Arg2894del)	splice	EAS	8
	RD19022764	1	USH	Exon64	c.13877_13880del	N	p.(Gln4626Profs*7)	null (frameshift)	EAS	8
	RD19022764	1	USH	Exon46	c.9237_9240del	N	p.(Phe3080Leufs*16)	null (frameshift)	EAS	8
	RD19022786	1	USH	IVS40	c.7594+1G>A	ABE	p.(?)	splice	EAS	8
	RD19022786	1	USH	Exon3	c.538T>C	CBE	p.(Ser180Pro)	missense	EAS	8
	RD19020041	1	RP	Exon38	c.7188G>A	ABE	p.(Trp2396*)	null (nonsense)	EAS	8
	RD19020041	1		Exon13	c.2802T>G	GBE*	p.(Cys934Trp)	missense	EAS	8
	RD1902199	1	USH	IVS58	c.11389+1G>C	GBE	p.(?)	splice	EAS	8
	RD1902199	1	USH	Exon13	c.2802T>G	GBE*	p.(Cys934Trp)	missense	EAS	8
	RD19022706	1	RP	Exon45	c.9047G>A	ABE	p.(Cys3016Tyr)	missense	EAS	8
	RD19022706	1		Exon34	c.6492A>C	GBE*	p.(Lys2164Asn)	missense	EAS	8
	DP1908363	1	USH	Exons34-35	Deletion Exon 34_35	N	deletion	copy number variation	EAS	8
	DP1908363	1	USH	IVS39	c.7452-15_7452-5delTTATTTCCCAT	N	p.(?)	intron variant	EAS	8
	DP19081631	1	USH	Exon43	c.8641_8642insTATT	N	p.(Ser2881Leufs*9)	null (frameshift)	EAS	8
	DP19081631	1	USH	Exon13	c.2310_2311insA	N	p.(Glu771Argfs*8)	null (frameshift)	EAS	8
	RD19040022	1	RP	Exon70	c.15178T>C	CBE	p.(Ser5060Pro)	missense	EAS	8
	RD19040022	1		Exon66	c.14570G>T	N	p.(Gly4857Val)	missense	EAS	8
	DDP190031	1	RP	Exon70	c.15178T>C	CBE	p.(Ser5060Pro)	missense	EAS	8
	DDP190031	1		Exon66	c.14570G>T	N	p.(Gly4857Val)	missense	EAS	8
	RD190400A	1	USH	Exon69	c.15017C>T	ABE	p.(Thr5006Met)	missense	EAS	8
	RD190400A	1	USH	Exon57	c.11156G>A	ABE	p.(Arg3719His)	missense	EAS	8
	RD190332A	1	RP	IVS33	c.6485+5G>A	ABE	p.(?)	intron variant	EAS	8
	RD190332A	1		Exon13	c.2802T>G	GBE*	p.(Cys934Trp)	missense	EAS	8
	RD180728A	1	USH	IVS42	c.8559-2A>G	CBE	p.(Tyr2854_Arg2894del)	splice	EAS	8
	RD180728A	1	USH	IVS42	c.8559-2A>G	CBE	p.(Tyr2854_Arg2894del)	splice	EAS	8
	RD180727A	1	RP	Exon63	c.13465G>A	ABE	p.(Gly4489Ser)	missense	EAS	8
	RD180727A	1		Exon63	c.13465G>A	ABE	p.(Gly4489Ser)	missense	EAS	8
	RD181841B	1	RP	Exon70	c.15178T>C	CBE	p.(Ser5060Pro)	missense	EAS	8
	RD181841B	1		Exon67	c.14586T>G	GBE*	p.(Tyr4862*)	null (nonsense)	EAS	8
	RD180430A	1	USH	IVS26	c.5298+2T>C	CBE	p.(?)	splice	EAS	8
	RD180430A	1	USH	Exon40	c.7525C>T	ABE	p.(Arg2509Trp)	missense	EAS	8
	DP18080533	1	USH	Exon57	c.11156G>A	ABE	p.(Arg3719His)	missense	EAS	8
	DP18080533	1	USH	Exon37	c.7068T>G	GBE*	p.(Asn2356Lys)	missense	EAS	8
	DP18080533	1	USH	IVS22	c.4758+3A>G	CBE	p.(?)	intron variant	EAS	8
	DP18086534	1	RP	Exon70	c.15178T>C	CBE	p.(Ser5060Pro)	missense	EAS	8
	DP18086534	1		Exon27	c.5329C>T	ABE	p.(Arg1777Trp)	missense	EAS	8
	DP190056-1	1	RP	IVS42	c.8559-2A>G	CBE	p.(Tyr2854_Arg2894del)	splice	EAS	8
	DP190056-1	1		Exon13	c.2802T>G	GBE*	p.(Cys934Trp)	missense	EAS	8
	DP1908968-1	1	RP	Exon63	c.13274C>T	ABE	p.(Thr4425Met)	missense	EAS	8
	DP1908968-1	1		IVS19	c.4251+1G>A	ABE	p.(?)	splice	EAS	8
	DP18080005	1	USH	Exon48	c.9469C>T	ABE	p.(Gln3157*)	null (nonsense)	EAS	8
	DP18080005	1	USH	Exon14	c.2914T>G	N	p.(Cys972Gly)	missense	EAS	8
	DP18080539	1	RP	Exon13	c.2802T>G	GBE*	p.(Cys934Trp)	missense	EAS	8
	DP18080539	1		Exon17	c.3544T>C	CBE	p.(Tyr1182His)	missense	EAS	8
	DP18085405	1	USH	IVS42	c.8559-2A>G	CBE	p.(Tyr2854_Arg2894del)	splice	EAS	8
	DP18085405	1	USH	Exon35	c.6741delC	N	p.(Ala2249Profs*30)	null (frameshift)	EAS	8
	DP19052236	1	RP	Exon21	c.4576G>A	ABE	p.(Gly1526Arg)	missense	EAS	8
	DP19052236	1		Exon13	c.2802T>G	GBE*	p.(Cys934Trp)	missense	EAS	8
	DP18106566	1	RP	Exon13	c.2802T>G	GBE*	p.(Cys934Trp)	missense	EAS	8
	DP18106566	1		IVS42	c.8559-2A>G	CBE	p.(Tyr2854_Arg2894del)	splice	EAS	8
	DP18065739	1	RP	Exon13	c.2802T>G	GBE*	p.(Cys934Trp)	missense	EAS	8
	DP18065739	1		Exon13	c.2802T>G	GBE*	p.(Cys934Trp)	missense	EAS	8
	DP18085740	1	RP	Exon13	c.2802T>G	GBE*	p.(Cys934Trp)	missense	EAS	8
	DP18085740	1		Exon13	c.2802T>G	GBE*	p.(Cys934Trp)	missense	EAS	8
	DTP1908103	1	USH	Exon13	c.2802T>G	GBE*	p.(Cys934Trp)	missense	EAS	8
	DTP1908103	1	USH	Exon47	Deletion Exon47	N	deletion	gross deletion	EAS	8
	DTP190109	1	USH	Exon2	c.252T>A	N	p.(Cys84*)	null (nonsense)	EAS	8
	DTP190109	1	USH	IVS33	c.6485+1G>C	GBE	p.(?)	splice	EAS	8
	DTP1901698	1	USH	IVS42	c.8559-2A>G	CBE	p.(Tyr2854_Arg2894del)	splice	EAS	8
	DTP1901698	1	USH	Exon55	c.10859T>C	CBE	p.(Ile3620Thr)	missense	EAS	8
	DTP1810226	1	USH	IVS42	c.8559-2A>G	CBE	p.(Tyr2854_Arg2894del)	splice	EAS	8
	DTP1810226	1	USH	Exon2	c.99_100insT	N	p.(Arg34Serfs*41)	null (frameshift)	EAS	8
	DP180600600M	1	RP	Exon13	c.2802T>G	GBE*	p.(Cys934Trp)	missense	EAS	8
	DP180600600M	1		Exon58	c.11235C>G	GBE	p.(Tyr3745*)	null (nonsense)	EAS	8
	DP18036854	1	USH	Exon2	c.99_100insT	N	p.(Arg34Serfs*41)	null (frameshift)	EAS	8
	DP18036854	1	USH	Exon2	c.99_100insT	N	p.(Arg34Serfs*41)	null (frameshift)	EAS	8
	DP18126966	1	USH	Exon42	c.8232G>C	GBE	p.(Trp2744Cys)	missense	EAS	8
	DP18126966	1	USH	Exon41	c.7698T>A	N	p.(Tyr2566*)	null (nonsense)	EAS	8
	DTP1908998	1	RP	Exon70	c.15178T>C	CBE	p.(Ser5060Pro)	missense	EAS	8
	DTP1908998	1		Exon13	c.2802T>G	GBE*	p.(Cys934Trp)	missense	EAS	8
	DTP1910011	1	USH	Exon63	c.12358C>T	ABE	p.(Arg4120Cys)	missense	EAS	8
	DTP1910011	1	USH	Exon42	c.8232G>C	GBE	p.(Trp2744Cys)	missense	EAS	8
	DTP1910011	1	USH	Exon13	c.2802T>G	GBE*	p.(Cys934Trp)	missense	EAS	8
	DTP1900305	1	USH	IVS33	c.6485+5G>A	ABE	p.(?)	intron variant	EAS	8
	DTP1900305	1	USH	Exon48	c.9422T>C	CBE	p.(Leu3141Pro)	missense	EAS	8
	DTP1901225	1	RP	Exon27	c.5485C>T	ABE	p.(Gln1829*)	null (nonsense)	EAS	8
	DTP1901225	1		Exon13	c.2802T>G	GBE*	p.(Cys934Trp)	missense	EAS	8
	DTP190033	1	USH	Exon63	c.13112_13115delAAAT	N	p.(Gln4371Argfs*19)	null (frameshift)	EAS	8
	DTP190033	1	USH	IVS42	c.8559-2A>G	CBE	p.(Tyr2854_Arg2894del)	splice	EAS	8
	DTP1908095	1	USH	Exon23	c.4821G>C	GBE	p.(Trp1607Cys)	missense	EAS	8
	DTP1908095	1	USH	Exon43	c.8641_8642insTATT	N	p.(Ser2881Leufs*9)	null (frameshift)	EAS	8
	DP19010259	1	USH	Exon23	c.4821G>C	GBE	p.(Trp1607Cys)	missense	EAS	8
	DP19010259	1	USH	Exon43	c.8641_8642insTATT	N	p.(Ser2881Leufs*9)	null (frameshift)	EAS	8
	DP19003141	1	RP	Exon2	c.100_101insT	N	p.(Arg34Leufs*41)	null (frameshift)	EAS	8
	DP19003141	1	RP	Exon47	c.9259G>A	ABE	p.(Val3087Ile)	missense	EAS	8
	RD181026A	1	USH	Exon48	c.9469C>T	ABE	p.(Gln3157*)	null (nonsense)	EAS	8
	RD181026A	1	USH	IVS48	c.9570+1G>A	ABE	p.(?)	splice	EAS	8
	DTP1901236	1	RP	Exon72	c.15562A>G	CBE	p.(Ser5188Gly)	missense	EAS	8
	DTP1901236	1	RP	Exon47	c.9340C>T	ABE	p.(Pro3114Ser)	missense	EAS	8
	DTPl 91161	1	RP	IVS38	c.7300+1G>T	N	p.(?)	splice	EAS	8
	DTPl 91161	1	RP	Exon66	c.14404T>C	CBE	p.(Ser4802Pro)	missense	EAS	8
	DTPl 91161	1	RP	IVS42	c.8559-2A>G	CBE	p.(Tyr2854_Arg2894del)	splice	EAS	8
	DT19001417	1	USH	Exon2	c.99_100insT	N	p.(Arg34Serfs*41)	null (frameshift)	EAS	8
	DT19001417	1	USH	Exon2	c.99_100insT	N	p.(Arg34Serfs*41)	null (frameshift)	EAS	8
	DT19001018	1	USH	Exon21	c.4517_4518delAG	N	p.(Glu1506Valfs*23)	null (frameshift)	EAS	8
	DT19001018	1	USH	Exon42	c.8232G>C	GBE	p.(Trp2744Cys)	missense	EAS	8
		6	USH	Exon2	c.99_100insT	N	p.(Arg34Serfs*41)	null (frameshift)	EAS	9
		1	USH	Exon2	c.206G>T	N	p.(Ser69Ile)	missense	EAS	9
		1	USH	Exon3	c.538T>C	CBE	p.(Ser180Pro)	missense	EAS	9
		3	USH	Exon5	c.802G>A	ABE	p.(Gly268Arg)	missense	EAS	9
		2	USH	IVS5	c.848+5G>C	GBE	p.(?)	intron variant	EAS	9
		1	USH	Exon6	c.1001G>A	ABE	p.(Arg334Gln)	missense	EAS	9
		2	USH	Exon61	c.1190T>A	N	p.(Ile397Lys)	missense	EAS	9
		1	USH	Exon8	c.1346G>T	N	p.(Arg449Leu)	missense	EAS	9
		1	USH	Exon8	c.1434G>C	GBE	p.(Glu478Asp)	missense	EAS	9
		1	USH	Exon8	c.1448C>T	ABE	p.(Thr483Met)	missense	EAS	9
		1	USH	IVS9	c.1645-1G>C	GBE	p.(?)	splice	EAS	9
		1	USH	Exon10	c.1723T>A	N	p.(Cys575Ser)	missense	EAS	9
		3	USH	Exon11	c.1876C>T	ABE	p.(Arg626*)	null (nonsense)	EAS	9
		1	USH	Exon12	c.2023C>T	ABE	p.(Gln675*)	null (nonsense)	EAS	9
		1	USH	Exon13	c.2363delA	N	p.(Asp788Vfs*68)	null (frameshift)	EAS	9
		1	USH	Exon13	c.2484delA	N	p.(Lys828Nfs*28)	null (frameshift)	EAS	9
		10	USH	Exon13	c.2802T>G	GBE*	p.(Cys934Trp)	missense	EAS	9
		1	USH	Exon17	c.3700delinsTGCCCT	N	p.(Ile1234Cysfs*5)	null (frameshift)	EAS	9
		1	USH	Exon17	c.3788G>A	ABE	p.(Trp1263*)	null (nonsense)	EAS	9
		2	USH	Exon18	c.4071delG	N	p.(Gly1358Glufs*8)	null (frameshift)	EAS	9
		1	USH	Exon19	c.4128C>G	GBE	p.(Tyr1376*)	null (nonsense)	EAS	9
		1	USH	Exon19	c.4183delG	N	p.(Val1395Wfs*37)	null (frameshift)	EAS	9
		1	USH	Exon21	c.4616C>T	ABE	p.(Thr1539Ile)	missense	EAS	9
		1	USH	Exon22	c.4732C>T	ABE	p.(Arg1578Cys)	missense	EAS	9
		1	USH	IVS22	c.4758+3A>G	CBE	p.(?)	intron variant	EAS	9
		1	USH	Exon27	c.5398T>C	CBE	p.(Trp1800Arg)	missense	EAS	9
		1	USH	Exon28	c.5581G>A	ABE	p.(Gly1861Ser)	missense	EAS	9
		1	USH	Exon28	c.5735_5736delAA	N	p.(Lys1912Argfs*24)	null (frameshift)	EAS	9
		1	USH	Exon30	c.5917G>A	ABE	p.(Val1973Leu)	missense	EAS	9
		1	USH	Exon30	c.5953G>A	ABE	p.(Glu1985Lys)	missense	EAS	9
		1	USH	Exon31	c.6083A>G	CBE	p.(Tyr2028Cys)	missense	EAS	9
		1	USH	Exon32	c.6249delT	N	p.(Ile2084Leufs*2)	null (frameshift)	EAS	9
		1	USH	IVS32	c.6325+1G>A	ABE	p.(?)	splice	EAS	9
		1	USH	Exon34	c.6628C>G	GBE	p.(Pro2210Ala)	missense	EAS	9
		1	USH	Exon34	c.6653T>C	CBE	p.(Leu2218Pro)	missense	EAS	9
		4	USH	Exon35	c.6741delC	N	p.(Ala2249Profs*30)	null (frameshift)	EAS	9
		1	USH	Exon35	c.6766T>C	CBE	p.(Ser2256Pro)	missense	EAS	9
		1	USH	Exon36	c.6806G>T	N	p.(Gly2269Val)	missense	EAS	9
		2	USH	Exon37	c.6967C>T	ABE	p.(Arg2323*)	null (nonsense)	EAS	9
		1	USH	Exon37	c.6998T>C	CBE	p.(Val2333Ala)	missense	EAS	9
		1	USH	Exon37	c.7068T>G	GBE*	p.(Asn2356Lys)	missense	EAS	9
		1	USH	Exon38	c.7123delG	N	p.(G2375Vfs*7)	null (frameshift)	EAS	9
		1	USH	Exon38	c.7231C>T	ABE	p.(Gln2411*)	null (nonsense)	EAS	9
		1	USH	Exon39	c.7343delC	N	p.(Pro2448Qfs*26)	null (frameshift)	EAS	9
		1	USH	IVS40	c.7594+1G>A	ABE	p.(?)	splice	EAS	9
		1	USH	Exon41	c.7871C>T	ABE	p.(Pro2624Leu)	missense	EAS	9
		1	USH	Exon41	c.7936_7937insAC	N	p.(Pro2646Hfs*29)	null (frameshift)	EAS	9
		1	USH	Exon41	c.7984A>T	N	p.(Arg2662*)	null (nonsense)	EAS	9
		4	USH	Exon42	c.8232G>C	GBE	p.(Trp2744Cys)	missense	EAS	9
		1	USH	Exon42	c.8254G>A	ABE	p.(Gly2752Arg)	missense	EAS	9
		2	USH	Exon42	c.8284C>G	GBE	p.(Pro2762Ala)	missense	EAS	9
		1	USH	Exon42	c.8372T>C	CBE	p.(Val2791Ala)	missense	EAS	9
		1	USH	Exon42	c.8431C>A	N	p.(Pro2811Thr)	missense	EAS	9
		1	USH	Exon42	c.8483delC	N	p.(Ser2828Lfs*2)	null (frameshift)	EAS	9
		26	USH	IVS42	c.8559-2A>G	CBE	p.(Tyr2854_Arg2894del)	splice	EAS	9
		1	USH	Exon44	c.8769delT	N	p.(Leu2924Ffs*20)	null (frameshift)	EAS	9
		1	USH	Exon47	c.9259G>A	ABE	p.(Val3087Ile)	missense	EAS	9
		1	USH	Exon47-51	c.9259-?_10182+?del	N	p.(?)	copy number variation	EAS	9
		1	USH	Exon48	c.9450G>A	ABE	p.(Trp3150*)	null (nonsense)	EAS	9
		1	USH	Exon48	c.9453T>A	N	p.(Tyr3151*)	null (nonsense)	EAS	9
		1	USH	Exon48	c.9469C>T	ABE	p.(Gln3157*)	null (nonsense)	EAS	9
		1	USH	Exon48	c.9492_9498delTGATGAG	N	p.(Asp3165Sfs*5)	null (frameshift)	EAS	9
		2	USH	Exon50	c.9958G>T	N	p.(Gly3320Cys)	missense	EAS	9
		1	USH	Exon52	c.10274G>T	N	p.(Cys3425Phe)	missense	EAS	9
		1	USH	Exon54	c.10636G>T	N	p.(Gly3546*)	null (nonsense)	EAS	9
		1	USH	Exon56	c.10962C>A	N	p.(Tyr3654*)	null (nonsense)	EAS	9
		1	USH	Exon57	c.11156G>A	ABE	p.(Arg3719His)	missense	EAS	9
		1	USH	Exon58	c.11381+1delG	N	p.(?)	splice	EAS	9
		1	USH	Exon61	c.11806A>C	N	p.(Thr3936Pro)	missense	EAS	9
		1	USH	Exon62	c.12104C>T	ABE	p.(Pro4035Leu)	missense	EAS	9
		2	USH	Exon62	c.12275_12279delGAACCinsTGTGATGTGATTAAGGT	N	p.(Arg4092Mfs *2)	null (frameshift)	EAS	9
		1	USH	Exon63	c.12868C>T	ABE	p.(Gln4290*)	null (nonsense)	EAS	9
		1	USH	Exon63	c.13040_13062delinsTCAGAAGTCA	N	p.(Thr4347Ifs*22)	null (frameshift)	EAS	9
		1	USH	Exon63	c.13270T>C	CBE	p.(Cys4424Arg)	missense	EAS	9
		1	USH	Exon63	c.13339A>G	CBE	p.(Met4447Val)	missense	EAS	9
		1	USH	IVS65	c.14343+5G>A	ABE	p.(?)	intron variant	EAS	9
		1	USH	Exon66	c.14403C>G	GBE	p.(Tyr4801*)	null (nonsense)	EAS	9
		1	USH	Exon66	c.14556delC	N	p.(Met4853Cfs*31)	null (frameshift)	EAS	9
		1	USH	Exon70	c.15178T>C	CBE	p.(Ser5060Pro)	missense	EAS	9
		3	USH	Exon71	c.15427C>T	ABE	p.(Arg5143Cys)	missense	EAS	9
	7	1	RP	Exon64	c.14017T>C	CBE	p.(Tyr4673His)	missense	EAS	10
	7	1	RP	Exon13	c.2802T>G	GBE*	p.(Cys934Trp)	missense	EAS	10
	9	1	RP	Exon22	c.4732C>T	ABE	p.(Arg1578Cys)	missense	EAS	10
	9	1	RP	Exon42	c.8284C>G	GBE	p.(Pro2762Ala)	missense	EAS	10
	31	1	RP	Exon63	c.12560G>A	ABE	p.(Arg4187His)	missense	EAS	10
	31	1	RP	Exon28	c.5608C>T	ABE	p.(Arg1870Trp)	missense	EAS	10
	34	1	RP	Exon40	c.7569G>A	ABE	p.(Trp2523*)	null (nonsense)	EAS	10
	34	1	RP	Exon55	c.10859T>G	N	p.(Ile3620Thr)	missense	EAS	10
	35	1	RP	Exon41	c.7783G>A	ABE	p.(Ala2595Thr)	missense	EAS	10
	35	1	RP	Exon55	c.10859T>G	N	p.(Ile3620Thr)	missense	EAS	10
	46	1	RP	Exon55	c.10931C>T	ABE	p.(Thr3644Met)	missense	EAS	10
	46	1	RP	IVS22	c.4758+3A>G	CBE	p.(?)	intron variant	EAS	10
	72	1	RP	Exon61	c.11806A>C	N	p.(Thr3936Pro)	missense	EAS	10
	72	1	RP	Exon3	c.538T>C	CBE	p.(Ser180Pro)	missense	EAS	10
	76	1	RP	Exon63	c.13010C>T	ABE	p.(Thr4337Met)	missense	EAS	10
	76	1	RP	Exon8	c.1397G>T	N	p.(Gly466Val)	missense	EAS	10
	81	1	RP	IVS42	c.8559-2A>G	CBE	p.(Tyr2854_Arg2894del)	splice	EAS	10
	81	1	RP	IVS42	c.8559-2A>G	CBE	p.(Tyr2854_Arg2894del)	splice	EAS	10
	89	1	RP	Exon66	c.14411G>A	ABE	p.(Gly4804Glu)	missense	EAS	10
	89	1	RP	IVS42	c.8559-2A>G	CBE	p.(Tyr2854_Arg2894del)	splice	EAS	10
	90	1	RP	IVS42	c.8559-2A>G	CBE	p.(Tyr2854_Arg2894del)	splice	EAS	10
	90	1	RP	Exon17	c.3788G>A	ABE	p.(Trp1263*)	null (nonsense)	EAS	10
	92	1	RP	IVS42	c.8559-2A>G	CBE	p.(Tyr2854_Arg2894del)	splice	EAS	10
	92	1	RP	Exon41	c.8167C>T	ABE	p.(Arg2723*)	null (nonsense)	EAS	10
	95	1	RP	IVS42	c.8559-2A>G	CBE	p.(Tyr2854_Arg2894del)	splice	EAS	10
	95	1	RP	IVS42	c.8559-2A>G	CBE	p.(Tyr2854_Arg2894del)	splice	EAS	10
	96	1	RP	IVS42	c.8559-2A>G	CBE	p.(Tyr2854_Arg2894del)	splice	EAS	10
	96	1	RP	IVS42	c.8559-2A>G	CBE	p.(Tyr2854_Arg2894del)	splice	EAS	10
	100	1	RP	IVS42	c.8559-2A>G	CBE	p.(Tyr2854_Arg2894del)	splice	EAS	10
	100	1	RP	Exon33	c.6383G>A	ABE	p.(Cys2128Tyr)	missense	EAS	10
	101	1	RP	Exon31	c.6083A>G	CBE	p.(Tyr2028Cys)	missense	EAS	10
	101	1	RP	Exon13	c.2802T>G	GBE*	p.(Cys934Trp)	missense	EAS	10
	111	1	CORD	Exon70	c.15178T>C	CBE	p.(Ser5060Pro)	missense	EAS	10
	111	1	CORD	Exon24	c.4957C>T	ABE	p.(Arg1653*)	null (nonsense)	EAS	10
	162	1	RP	Exon13	c.2802T>G	GBE*	p.(Cys934Trp)	missense	EAS	10
	162	1	RP	Exon13	c.2802T>G	GBE*	p.(Cys934Trp)	missense	EAS	10
	192	1	RP	Exon70	c.15178T>C	CBE	p.(Ser5060Pro)	missense	EAS	10
	192	1	RP	IVS42	c.8559-2A>G	CBE	p.(Tyr2854_Arg2894del)	splice	EAS	10
	202	1	RP	Exon64	c.14017T>C	CBE	p.(Tyr4673His)	missense	EAS	10
	202	1	RP	Exon50	c.9866G>T	N	p.(Gly3289Val)	missense	EAS	10
	206	1	RP	Exon37	c.7068T>G	GBE*	p.(Asn2356Lys)	missense	EAS	10
	206	1	RP	IVS22	c.4758+3A>G	CBE	p.(?)	intron variant	EAS	10
	210	1	RP	Exon22	c.4685C>A	N	p.(Ser1562*)	null (nonsense)	EAS	10
	210	1	RP	Exon13	c.2802T>G	GBE*	p.(Cys934Trp)	missense	EAS	10
	225	1	RP	Exon71	c.15427C>T	ABE	p.(Arg5143Cys)	missense	EAS	10
	225	1	RP	Exon50	c.9958G>T	N	p.(Gly3320Cys)	missense	EAS	10
	236	1	RP	Exon61	c.11865G>A	ABE	p.(Trp3955*)	null (nonsense)	EAS	10
	236	1	RP	Exon27	c.5329C>T	ABE	p.(Arg1777Trp)	missense	EAS	10
	249	1	RP	Exon13	c.2802T>G	GBE*	p.(Cys934Trp)	missense	EAS	10
	249	1	RP	Exon63	c.13339A>G	CBE	p.(Met4447Val)	missense	EAS	10
	251	1	RP	Exon68	c.14876G>A	ABE	p.(Gly4959Asp)	missense	EAS	10
	251	1	RP	Exons11-21	Deletion Exon 11-21	N	deletion	copy number variation	EAS	10
	272	1	CORD	Exon64	c.13836C>A	N	p.(Cys4612*)	null (nonsense)	EAS	10
	272	1	CORD	Exon37	c.7036_7057del	N	p.(His2346Phefs*7)	null (frameshift)	EAS	10
	273	1	RP	IVS42	c.8559-2A>G	CBE	p.(Tyr2854_Arg2894del)	splice	EAS	10
	273	1	RP	IVS42	c.8559-2A>G	CBE	p.(Tyr2854_Arg2894del)	splice	EAS	10
	274	1	RP	IVS42	c.8559-2A>G	CBE	p.(Tyr2854_Arg2894del)	splice	EAS	10
	274	1	RP	IVS42	c.8559-2A>G	CBE	p.(Tyr2854_Arg2894del)	splice	EAS	10
	293	1	RP	Exon13	c.2802T>G	GBE*	p.(Cys934Trp)	missense	EAS	10
	293	1	RP	Exon13	c.2802T>G	GBE*	p.(Cys934Trp)	missense	EAS	10
	322	1	RP	IVS42	c.8559-2A>G	CBE	p.(Tyr2854_Arg2894del)	splice	EAS	10
	322	1	RP	Exon18	c.3862G>T	N	p.(Glu1288*)	null (nonsense)	EAS	10
	329	1	RP	Exon63	c.12580T>C	CBE	p.(Cys4194Arg)	missense	EAS	10
	329	1	RP	Exon2	c.99_100insT	N	p.(Arg34Serfs*41)	null (frameshift)	EAS	10
	337	1	RP	Exon70	c.15178T>C	CBE	p.(Ser5060Pro)	missense	EAS	10
	337	1	RP	IVS42	c.8559-2A>G	CBE	p.(Tyr2854_Arg2894del)	splice	EAS	10
	357	1	RP	Exon10	c.1824dupT	N	p.(Glu609*)	null (nonsense)	EAS	10
	357	1	RP	IVS22	c.4758+3A>G	CBE	p.(?)	intron variant	EAS	10
	361	1	RP	Exon37	c.7068T>G	GBE*	p.(Asn2356Lys)	missense	EAS	10
	361	1	RP	Exon28	c.5608C>T	ABE	p.(Arg1870Trp)	missense	EAS	10
	363	1	RP	Exon54	c.10712C>T	ABE	p.(Thr3571Met)	missense	EAS	10
	363	1	RP	Exon30	c.5976T>G	GBE*	p.(Tyr1992*)	null (nonsense)	EAS	10
	373	1	RP	Exon68	c.14876G>A	ABE	p.(Gly4959Asp)	missense	EAS	10
	373	1	RP	Exons5-9	Deletion Exon 5-9	N	deletion	copy number variation	EAS	10
	381	1	RP	Exon26	c.5200G>C	GBE	p.(Gly1734Arg)	missense	EAS	10
	381	1	RP	Exon13	c.2802T>C	CBE	p.(Cys934Trp)	missense	EAS	10
	417	1	RP	Exon66	c.14374C>T	ABE	p.(Leu4792Phe)	missense	EAS	10
	417	1	RP	Exon63	c.13465G>A	ABE	p.(Gly4489Ser)	missense	EAS	10
	421	1	CORD	Exon15	c.3034G>T	N	p.(Glu1012*)	null (nonsense)	EAS	10
	421	1	CORD	Exon13	c.2802T>G	GBE*	p.(Cys934Trp)	missense	EAS	10
	429	1	RP	IVS42	c.8559-2A>G	CBE	p.(Tyr2854_Arg2894del)	splice	EAS	10
	429	1	RP	Exon13	c.2802T>G	GBE*	p.(Cys934Trp)	missense	EAS	10
	436	1	RP	Exon37	c.7068T>G	GBE*	p.(Asn2356Lys)	missense	EAS	10
	436	1	RP	Exon25	c.5051C>T	ABE	p.(Pro1684Leu)	missense	EAS	10
	440	1	CORD	Exon41	c.8167C>T	ABE	p.(Arg2723*)	null (nonsense)	EAS	10
	440	1	CORD	Exon15	c.3034G>T	N	p.(Glu1012*)	null (nonsense)	EAS	10
	460	1	RP	Exon37	c.6986C>A	N	p.(Pro2329His)	missense	EAS	10
	460	1	RP	IVS22	c.4758+3A>G	CBE	p.(?)	intron variant	EAS	10
	463	1	RP	Exon48	c.9375delT	N	p.(Leu3126Phefs*34)	null (frameshift)	EAS	10
	463	1	RP	Exon13	c.2217dupT	N	p.(Asn740*)	null (nonsense)	EAS	10
	474	1	RP	Exon63	c.13400C>T	ABE	p.(Pro4467Leu)	missense	EAS	10
	474	1	RP	Exon10	c.1824dupT	N	p.(Glu609*)	null (nonsense)	EAS	10
	490	1	RP	Exon63	c.13339A>G	CBE	p.(Met4447Val)	missense	EAS	10
	490	1	RP	IVS42	c.8559-2A>G	CBE	p.(Tyr2854_Arg2894del)	splice	EAS	10
	495	1	RP	Exon13	c.2802T>G	GBE*	p.(Cys934Trp)	missense	EAS	10
	495	1	RP	Exon5	c.802G>A	ABE	p.(Gly268Arg)	missense	EAS	10
	521	1	RP	Exon53	c.10481C>T	ABE	p.(Thr3494Ile)	missense	EAS	10
	521	1	RP	Exon50	c.9958G>T	N	p.(Gly3320Cys)	missense	EAS	10
	522	1	RP	IVS46	c.9258+1G>T	N	p.(?)	splice	EAS	10
	522	1	RP	Exon2	c.484A>G	CBE	p.(Met162Val)	missense	EAS	10
	527	1	RP	Exon56	c.10962C>A	N	p.(Tyr3654*)	null (nonsense)	EAS	10
	527	1	RP	Exon50	c.9958G>T	N	p.(Gly3320Cys)	missense	EAS	10
	551	1	MD	Exon57	c.11156G>A	ABE	p.(Arg3719His)	missense	EAS	10
	551	1	MD	Exon37	c.7068T>G	GBE*	p.(Asn2356Lys)	missense	EAS	10
	556	1	RP	Exon61	c.11806A>C	N	p.(Thr3936Pro)	missense	EAS	10
	556	1	RP	Exon61	c.11806A>C	N	p.(Thr3936Pro)	missense	EAS	10
	558	1	CORD	Exon13	c.2802T>G	GBE*	p.(Cys934Trp)	missense	EAS	10
	558	1	CORD	IVS42	c.8559-2A>G	CBE	p.(Tyr2854_Arg2894del)	splice	EAS	10
	566	1	RP	Exon6	c.997T>C	CBE	p.(Ser333Pro)	missense	EAS	10
	566	1	RP	Exon13	c.2750G>A	ABE	p.(Ser917Asn)	missense	EAS	10
	567	1	RP	Exon66	c.14354G>T	N	p.(Gly4785Val)	missense	EAS	10
	567	1	RP	Exon10	c.1824dupT	N	p.(Glu609*)	null (nonsense)	EAS	10
	695	1	RP	IVS33	c.6485+5G>A	ABE	p.(?)	intron variant	EAS	10
	695	1	RP	Exon13	c.2802T>G	GBE*	p.(Cys934Trp)	missense	EAS	10
	717	1	RP	Exon64	c.14017T>C	CBE	p.(Tyr4673His)	missense	EAS	10
	717	1	RP	Exon13	c.2802T>G	GBE*	p.(Cys934Trp)	missense	EAS	10
	726	1	RP	Exon66	c.14401T>C	CBE	p.(Tyr4801His)	missense	EAS	10
	726	1	RP	Exon57	c.11156G>A	ABE	p.(Arg3719His)	missense	EAS	10
	737	1	RP	Exon51	c.10049dupA	N	p.(Asn3351Glufs*2)	null (frameshift)	EAS	10
	737	1	RP	Exon42	c.8232G>C	GBE	p.(Trp2744Cys)	missense	EAS	10
	739	1	RP	Exon63	c.13339A>G	CBE	p.(Met4447Val)	missense	EAS	10
	739	1	RP	Exon2	c.99_100insT	N	p.(Arg34Serfs*41)	null (frameshift)	EAS	10
	742	1	RP	Exon50	c.9958G>T	N	p.(Gly3320Cys)	missense	EAS	10
	742	1	RP	Exon42	c.8284C>G	GBE	p.(Pro2762Ala)	missense	EAS	10
	748	1	RP	Exon70	c.15178T>C	CBE	p.(Ser5060Pro)	missense	EAS	10
	748	1	RP	IVS42	c.8559-2A>G	CBE	p.(Tyr2854_Arg2894del)	splice	EAS	10
	785	1	RP	Exon32	c.6249delT	N	p.(Ile2084Leufs*2)	null (frameshift)	EAS	10
	785	1	RP	Exon11	c.1876C>T	ABE	p.(Arg626*)	null (nonsense)	EAS	10
	793	1	RP	IVS42	c.8559-2A>G	CBE	p.(Tyr2854_Arg2894del)	splice	EAS	10
	793	1	RP	Exon19	c.4124C>A	N	p.(Ser1375*)	null (nonsense)	EAS	10
	R1	1	RP	Exon28	c.5752G>A	ABE	p.(Glu1918Lys)	missense	EAS	This study
	R1	1	RP	Exon37	c.7068T>G	GBE*	p.(Asn2356Lys)	missense	EAS	This study
	R2	1	RP	Exon13	c.2802T>G	GBE*	p.(Cys934Trp)	missense	EAS	This study
	R2	1	RP	Exon48	c.9469C>T	ABE	p.(Gln3157*)	null (nonsense)	EAS	This study
	R3	1	RP	Exon36	c.6908C>T	ABE	p.(Ser2303Phe)	missense	EAS	This study
	R3	1	RP	Exon72	c.15562A>G	CBE	p.(Ser5188Gly)	missense	EAS	This study
	R4	1	RP	Exon13	c.2617G>A	ABE	p.(Gly873Arg)	missense	EAS	This study
	R4	1	RP	Exon72	c.15562A>G	CBE	p.(Ser5188Gly)	missense	EAS	This study
	R5	1	RP	Exon13	c.2802T>G	GBE*	p.(Cys934Trp)	missense	EAS	This study
	R5	1	RP	Exon57	c.11156G>A	ABE	p.(Arg3719His)	missense	EAS	This study
	R6	1	RP	Exon52	c.10342G>A	ABE	p.(Glu3448Lys)	missense	EAS	This study
	R6	1	RP	Exon59	c.11503_11523delinsCTTGT	N	p.(Thr3835Leufs*3)	null (frameshift)	EAS	This study
	R7	1	RP	Exon13	c.2802T>G	GBE*	p.(Cys934Trp)	missense	EAS	This study
	R7	1	RP	Exon21	c.4576G>A	ABE	p.(Gly1526Arg)	missense	EAS	This study
	R8	1	RP	Exon20	c.4384delA	N	p.(Thr1462Leufs*2)	null (frameshift)	EAS	This study
	R8	1	RP	Exon20	c.4384delA	N	p.(Thr1462Leufs*2)	null (frameshift)	EAS	This study
	R9	1	RP	Exon63	c.13156A>T	N	p.(Ile4386Phe)	missense	EAS	This study
	R9	1	RP	IVS48	c.9570+1G>A	ABE	p.(?)	splice	EAS	This study
	R10	1	RP	Exon13	c.2802T>G	GBE*	p.(Cys934Trp)	missense	EAS	This study
	R10	1	RP	IVS42	c.8559-2A>G	CBE	p.(Tyr2854_Arg2894del)	splice	EAS	This study
	R11	1	RP	Exon63	c.12575G>A	ABE	p.(Arg4192His)	missense	EAS	This study
	R11	1	RP	N	Dup:chr1:215868952-216173866	N	deletion	copy number variation	EAS	This study
	R12	1	RP	Exon4	c.768A>G	CBE	p.(Ile256Met)	missense	EAS	This study
	R12	1	RP	Exon66	c.14567A>G	CBE	p.(Asn4856Ser)	missense	EAS	This study
	R13	1	RP	Exon13	c.2802T>G	GBE*	p.(Cys934Trp)	missense	EAS	This study
	R13	1	RP	Exon63	c.12358C>T	ABE	p.(Arg4120Cys)	missense	EAS	This study
	R14	1	RP	Exon37	c.7068T>G	GBE*	p.(Asn2356Lys)	missense	EAS	This study
	R14	1	RP	Exon37	c.7068T>G	GBE*	p.(Asn2356Lys)	missense	EAS	This study
	R15	1	RP	Exon28	c.5581G>A	ABE	p.(Gly1861Ser)	missense	EAS	This study
	R15	1	RP	Exon70	c.15178T>C	CBE	p.(Ser5060Pro)	missense	EAS	This study
	R16	1	RP	Exon33	c.6414_6415insCA	N	p.(Ala2139fs*14)	null (frameshift)	EAS	This study
	R16	1	RP	Exon8	c.1397G>T	N	p.(Gly466Val)	missense	EAS	This study
	R17	1	RP	Exon63	c.12495dupT	N	p.(Val4166Cysfs*7)	null (frameshift)	EAS	This study
	R17	1	RP	IVS48	c.9570+1G>A	ABE	p.(?)	splice	EAS	This study
	R18	1	RP	Exon12	c.1992dup	N	p.(Lys665*)	null (nonsense)	EAS	This study
	R18	1	RP	Exon13	c.2802T>G	GBE*	p.(Cys934Trp)	missense	EAS	This study
	R19	1	RP	Exon13	c.2802T>G	GBE*	p.(Cys934Trp)	missense	EAS	This study
	R19	1	RP	Exon63	c.13045_13046insG	N	p.(Ile4349Serfs*40)	null (frameshift)	EAS	This study
	R20	1	RP	Exon20	c.4267A>G	CBE	p.(Lys1423Glu)	missense	EAS	This study
	R20	1	RP	Exon43	c.8576G>A	ABE	p.(Arg2859His)	missense	EAS	This study
	R21	1	RP	Exon62	c.12284del	N	p.(Gly4095Valfs*2)	null (frameshift)	EAS	This study
	R21	1	RP	Exon62	c.12284del	N	p.(Gly4095Valfs*2)	null (frameshift)	EAS	This study
	R22	1	RP	Exon13	c.2802T>G	GBE*	p.(Cys934Trp)	missense	EAS	This study
	R22	1	RP	Exon63	c.12415G>C	GBE	p.(Gly4139Arg)	missense	EAS	This study
	R23	1	RP	Exon13	c.2802T>G	GBE*	p.(Cys934Trp)	missense	EAS	This study
	R23	1	RP	Exon70	c.15178T>C	CBE	p.(Ser5060Pro)	missense	EAS	This study
	R24	1	RP	Exon13	c.2802T>G	GBE*	p.(Cys934Trp)	missense	EAS	This study
	R24	1	RP	IVS48	c.9570+1G>A	ABE	p.(?)	splice	EAS	This study
	R25	1	RP	Exon2	c.99_100insT	N	p.(Arg34Serfs*41)	null (frameshift)	EAS	This study
	R25	1	RP	Exon63	c.13339A>G	CBE	p.(Met4447Val)	missense	EAS	This study
	R26	1	RP	Exon13	c.2802T>G	GBE*	p.(Cys934Trp)	missense	EAS	This study
	R26	1	RP	Exon48	c.9469C>T	ABE	p.(Gln3157*)	null (nonsense)	EAS	This study
	R27	1	RP	Exon50	c.9801C>G	GBE	p.(Cys3267Trp)	missense	EAS	This study
	R27	1	RP	IVS42	c.8559-2A>G	CBE	p.(Tyr2854_Arg2894del)	splice	EAS	This study
	R28	1	RP	Exon42	c.8254G>A	ABE	p.(Gly2752Arg)	missense	EAS	This study
	R28	1	RP	Exon42	c.8254G>A	ABE	p.(Gly2752Arg)	missense	EAS	This study
	R29	1	RP	Exon37	c.7068T>G	GBE*	p.(Asn2356Lys)	missense	EAS	This study
	R29	1	RP	Exon54	c.10634G>A	ABE	p.(Arg3545Gln)	missense	EAS	This study
	R30	1	RP	Exon13	c.2802T>G	GBE*	p.(Cys934Trp)	missense	EAS	This study
	R30	1	RP	IVS42	c.8559-2A>G	CBE	p.(Tyr2854_Arg2894del)	splice	EAS	This study
	R31	1	RP	Exon13	c.2802T>G	GBE*	p.(Cys934Trp)	missense	EAS	This study
	R31	1	RP	Exon27	c.5528C>T	ABE	p.(Pro1843Leu)	missense	EAS	This study
	R32	1	RP	Exon13	c.2802T>G	GBE*	p.(Cys934Trp)	missense	EAS	This study
	R32	1	RP	Exon29	c.5836C>T	ABE	p.(Arg1946*)	null (nonsense)	EAS	This study
	R33	1	RP	IVS48	c.9570+1G>A	ABE	p.(?)	splice	EAS	This study
	R33	1	RP	IVS48	c.9570+1G>A	ABE	p.(?)	splice	EAS	This study
	R34	1	RP	Exon55	c.10859T>C	CBE	p.(Ile3620Thr)	missense	EAS	This study
	R34	1	RP	IVS42	c.8559-2A>G	CBE	p.(Tyr2854_Arg2894del)	splice	EAS	This study
	U1	1	USH	Exon21	c.4576G>A	ABE	p.(Gly1526Arg)	missense	EAS	This study
	U1	1	USH	Exon28	c.5581G>A	ABE	p.(Gly1861Ser)	missense	EAS	This study
	U2	1	USH	Exon13	c.2209C>T	ABE	p.(Arg737*)	null (nonsense)	EAS	This study
	U2	1	USH	Exon43	c.8603del	N	p.(Asn2868Ilefs*6)	null (frameshift)	EAS	This study
	U3	1	USH	Exon28	c.5581G>A	ABE	p.(Gly1861Ser)	missense	EAS	This study
	U3	1	USH	Exon71	c.15427C>T	ABE	p.(Arg5143Cys)	missense	EAS	This study
	U4	1	USH	Exon48	c.9469C>T	ABE	p.(Gln3157*)	null (nonsense)	EAS	This study
	U4	1	USH	Exon48	c.9469C>T	ABE	p.(Gln3157*)	null (nonsense)	EAS	This study
	U5	1	USH	IVS42	c.8559-2A>G	CBE	p.(Tyr2854_Arg2894del)	splice	EAS	This study
	U5	1	USH	IVS42	c.8559-2A>G	CBE	p.(Tyr2854_Arg2894del)	splice	EAS	This study
	U6	1	USH	Exon5	c.802G>A	ABE	p.(Gly268Arg)	missense	EAS	This study
	U6	1	USH	Exon50	c.9801C>G	GBE	p.(Cys3267Trp)	missense	EAS	This study
	U7	1	USH	Exon13	c.2599C>T	ABE	p.(Gln867*)	null (nonsense)	EAS	This study
	U7	1	USH	Exon3	c.538T>C	CBE	p.(Ser180Pro)	missense	EAS	This study
	U8	1	USH	Exon45	c.8917_8918delCT	N	p.(Leu2973Lysfs*79)	null (frameshift)	EAS	This study
	U8	1	USH	IVS42	c.8559-2A>G	CBE	p.(Tyr2854_Arg2894del)	splice	EAS	This study
	U9	1	USH	Exon57	c.11156G>A	ABE	p.(Arg3719His)	missense	EAS	This study
	U9	1	USH	IVS48	c.9570+1G>A	ABE	p.(?)	splice	EAS	This study
	U10	1	USH	Exon21	c.4576G>A	ABE	p.(Gly1526Arg)	missense	EAS	This study
	U10	1	USH	Exon48	c.9469C>T	ABE	p.(Gln3157*)	null (nonsense)	EAS	This study
	U11	1	USH	Exon22	c.4645C>T	ABE	p.(Arg1549*)	null (nonsense)	EAS	This study
	U11	1	USH	IVS22	c.4758+3A>G	CBE	p.(Gln1586_Gly1587ins5*)	intron variant	EAS	This study
	U12	1	USH	Exon17	c.3387dupT	N	p.(V1130Cfs*72)	null (frameshift)	EAS	This study
	U12	1	USH	Exon21	c.4576G>A	ABE	p.(Gly1526Arg)	missense	EAS	This study
	U13	1	USH	Exon28	c.5581G>A	ABE	p.(Gly1861Ser)	missense	EAS	This study
	U13	1	USH	Exon63	c.13045_13046insG	N	p.(Ile4349Serfs*40)	null (frameshift)	EAS	This study
	U14	1	USH	Exon48	c.9469C>T	ABE	p.(Gln3157*)	null (nonsense)	EAS	This study
	U14	1	USH	Exon48	c.9469C>T	ABE	p.(Gln3157*)	null (nonsense)	EAS	This study
	U15	1	USH	Exon28	c.5581G>A	ABE	p.(Gly1861Ser)	missense	EAS	This study
	U15	1	USH	Exon28	c.5581G>A	ABE	p.(Gly1861Ser)	missense	EAS	This study
	U16	1	USH	Exon3	c.538T>C	CBE	p.(Ser180Pro)	missense	EAS	This study
	U16	1	USH	Exon3	c.538T>C	CBE	p.(Ser180Pro)	missense	EAS	This study
	U17	1	USH	Exon21	c.4576G>A	ABE	p.(Gly1526Arg)	missense	EAS	This study
	U17	1	USH	Exon21	c.4576G>A	ABE	p.(Gly1526Arg)	missense	EAS	This study
Japan		1	USH	Exon3	c.490G>T	N	p.(Val164Phe)	missense	EAS	31
		1	USH	Exon13	c.2802T>G	GBE*	p.(Cys934Trp)	missense	EAS	31
		2	USH	Exon42	c.8396delG	N	p.(Gly2799Valfs*31)	null (frameshift)	EAS	31
		4	USH	IVS42	c.8559-2A>G	CBE	p.(Tyr2854_Arg2894del)	splice	EAS	31
		1	USH	Exon54	c.10712C>T	ABE	p.(Thr3571Met)	missense	EAS	31
		1	USH	Exon63	c.13010C>T	ABE	p.(Thr4337Met)	missense	EAS	31
		3	USH	Exon63	c.13576C>T	ABE	p.(Arg4526*)	null (nonsense)	EAS	31
		3	USH	Exon64	c.13847G>T	N	p.(Gly4616Val)	missense	EAS	31
		2	RP	Exon3	c.490G>T	N	p.(Val164Phe)	missense	EAS	31
		4	RP	Exon13	c.2802T>G	GBE*	p.(Cys934Trp)	missense	EAS	31
		3	RP	Exon17	c.3596_3598delAAG	N	p.(Glu1199del)	null (frameshift)	EAS	31
		6	RP	Exon42	c.8254G>A	ABE	p.(Gly2752Arg)	missense	EAS	31
		1	RP	Exon42	c.8396delG	N	p.(Gly2799Valfs*31)	null (frameshift)	EAS	31
		1	RP	IVS42	c.8559-2A>G	CBE	p.(Tyr2854_Arg2894del)	splice	EAS	31
		1	RP	Exon54	c.10712C>T	ABE	p.(Thr3571Met)	missense	EAS	31
		2	RP	Exon55	c.10859T>C	CBE	p.(Ile3620Thr)	missense	EAS	31
		4	RP	Exon65	c.14243C>T	ABE	p.(Ser4748Phe)	missense	EAS	31
		1	RP	Exon63	c.13010C>T	ABE	p.(Thr4337Met)	missense	EAS	31
		1	RP	Exon64	c.13847G>T	N	p.(Gly4616Val)	missense	EAS	31
		2	RP	Exon70	c.15233C>G	GBE	p.(Pro5078Arg)	missense	EAS	31
Korea	USHA2A-1	1	RP	Exon42	c.8254G>A	ABE	p.(Gly2752Arg)	missense	EAS	32
	USHA2A-1	1	RP	Exon2	c.451G>C	GBE	p.(Ala151Pro)	missense	EAS	32
	USHA2A-2	1	RP	IVS32	c.6326-1G>T	N	p.(?)	splice	EAS	32
	USHA2A-2	1	RP	Exon57	c.11156G>A	ABE	p.(Arg3719His)	missense	EAS	32
	USHA2A-3	1	RP	Exon13	c.2802T>G	GBE*	p.(Cys934Trp)	missense	EAS	32
	USHA2A-3	1	RP	Exon57	c.11136_11137del	N	p.(Gln3714fs)	null (frameshift)	EAS	32
	USHA2A-3	1	RP	Exon72	c.15518T>C	CBE	p.(Leu5173Pro)	missense	EAS	32
	USHA2A-4	1	RP	IVS42	c.8559-2A>G	CBE	p.(Tyr2854_Arg2894del)	splice	EAS	32
	USHA2A-4	1	RP	Exon13	c.2802T>G	GBE*	p.(Cys934Trp)	missense	EAS	32
	USHA2A-5∗	1	RP	Exon13	c.2802T>G	GBE*	p.(Cys934Trp)	missense	EAS	32
	USHA2A-5∗	1	RP	Exon63	c.13339A>G	CBE	p.(Met4447Val)	missense	EAS	32
	USHA2A-6	1	RP	Exon65	c.14287G>A	ABE	p.(Gly4763Arg)	missense	EAS	32
	USHA2A-6	1	RP	Exon61	c.1190T>A	N	p.(Ile397Lys)	missense	EAS	32
	USHA2A-7	1	RP	Exon37	c.7046G>A	ABE	p.(Trp2349*)	null (nonsense)	EAS	32
	USHA2A-7	1	RP	Exon13	c.2802T>G	GBE*	p.(Cys934Trp)	missense	EAS	32
	USHA2A-8	1	RP	Exon13	c.2802T>G	GBE*	p.(Cys934Trp)	missense	EAS	32
	USHA2A-8	1	RP	Exon42	c.8254G>A	ABE	p.(Gly2752Arg)	missense	EAS	32
	USHA2A-9	1	RP	Exon13	c.2802T>G	GBE*	p.(Cys934Trp)	missense	EAS	32
	USHA2A-9	1	RP	Exon13	c.2802T>G	GBE*	p.(Cys934Trp)	missense	EAS	32
	USHA2A-10	1	RP	Exon8	c.1450C>T	ABE	p.(Gln484*)	null (nonsense)	EAS	32
	USHA2A-10	1	RP	Exon13	c.2802T>G	GBE*	p.(Cys934Trp)	missense	EAS	32
	USHA2A-11	1	RP	IVS46	c.9258+1G>T	N	p.(?)	splice	EAS	32
	USHA2A-11	1	RP	Exon13	c.2802T>G	GBE*	p.(Cys934Trp)	missense	EAS	32
	USHA2A-11	1	RP	Exon66	c.14557A>G	CBE	p.(Met4853Val)	missense	EAS	32
	USHA2A-12	1	RP	IVS42	c.8559-2A>G	CBE	p.(Tyr2854_Arg2894del)	splice	EAS	32
	USHA2A-12	1	RP	Exon13	c.2802T>G	GBE*	p.(Cys934Trp)	missense	EAS	32
	USHA2A-12	1	RP	Exon70	c.15178T>C	CBE	p.(Ser5060Pro)	missense	EAS	32
	2	1	RP	Exon13	c.2776C>T	ABE	p.(Arg926Cys)	missense	EAS	33
	2	1	RP	Exon13	c.2414G>C	GBE	p.(G805Ala)	missense	EAS	33
	35	1	RP	Exon63	c.12404G>T	N	p.(Cys4135Phe)	missense	EAS	33
	35	1	RP	Exon71	c.15299G>C	GBE	p.(Gly5100Ala)	missense	EAS	33
	35	1	RP	Exon13	c.2802T>G	GBE*	p.(Cys934Trp)	missense	EAS	33
	38	1	RP	Exon55	c.10928delA	N	p.(His3643Leufs*31)	null (frameshift)	EAS	33
	38	1	RP	Exon63	c.13195delC	N	p.(Ala4400LeufsTer23)	null (frameshift)	EAS	33
	60	1	RP	IVS49	c.9740-1G>A	ABE	p.(?)	splice	EAS	33
	60	1	RP	Exon57	c.11156G>A	ABE	p.(Arg3719His)	missense	EAS	33
	60	1	RP	Exon17	c.3364T>G	N	p.(Ser1122Ala)	missense	EAS	33
	73	1	RP	IVS42	c.8559-2A>G	CBE	p.(Tyr2854_Arg2894del)	splice	EAS	33
	73	1	RP	Exon33	c.6485A>T	N	p.(Gln2162Leu)	missense	EAS	33
	77	1	RP	Exon58	c.11328T>G	GBE*	p.(Tyr3776*)	null (nonsense)	EAS	33
	77	1	RP	Exon17	c.3364T>G	N	p.(Ser1122Ala)	missense	EAS	33
	114	1	RP	Exon17	c.3745C>T	ABE	p.(Pro1249Ser)	missense	EAS	33
	114	1	RP	Exon24	c.4957C>T	ABE	p.(Arg1653*)	null (nonsense)	EAS	33
	114	1	RP	Exon18	c.4070C>T	ABE	p.(Thr1357Met)	missense	EAS	33
	121	1	RP	Exon64	c.14017T>C	CBE	p.(Tyr4673His)	missense	EAS	33
	121	1	RP	Exon35	c.6683T>A	N	p.(Val2228Glu)	missense	EAS	33
	126	1	RP	Exon70	c.15233C>G	GBE	p.(Pro5078Arg)	missense	EAS	33
	126	1	RP	Exon37	c.7068T>G	GBE*	p.(Asn2356Lys)	missense	EAS	33
	127	1	RP	Exon70	c.15233C>G	GBE	p.(Pro5078Arg)	missense	EAS	33
	127	1	RP	Exon37	c.7068T>G	GBE*	p.(Asn2356Lys)	missense	EAS	33
	131	1	RP	Exon37	c.6986C>A	N	p.(Pro2329His)	missense	EAS	33
	131	1	RP	Exon13	c.2802T>G	GBE*	p.(Cys934Trp)	missense	EAS	33
	135	1	RP	Exon63	c.13259C>T	ABE	p.(Ser4420Phe)	missense	EAS	33
	135	1	RP	Exon68	c.14911C>T	ABE	p.(Arg4971*)	null (nonsense)	EAS	33
	170	1	RP	IVS42	c.8559-2A>G	CBE	p.(Tyr2854_Arg2894del)	splice	EAS	33
	170	1	RP	IVS46	c.9258+1G>T	N	p.(?)	splice	EAS	33
Russia		6	USH	Exon61	c.11865G>A	ABE	p.(Trp3955*)	null (nonsense)	EUR	11
		1	USH	Exon29	c.5816C>A	N	p.(Ser1939*)	null (nonsense)	EUR	11
		2	USH	IVS43	c.8682-9A>G	CBE	p.(?)	intron variant	EUR	11
		2	USH	Exon24	c.4957C>T	ABE	p.(Arg1653*)	null (nonsense)	EUR	11
		2	USH	Exon13	c.2299del	N	p.(Glu767Serfs*21)	null (frameshift)	EUR	11
		1	USH	Exon29	c.5836C>T	ABE	p.(Arg1946*)	null (nonsense)	EUR	11
		1	USH	Exon18	c.3932C>A	N	p.(Ser1311*)	null (nonsense)	EUR	11
		2	USH	Exon63	c.13374del	N	p.(Glu4458Aspfs*3)	null (frameshift)	EUR	11
		1	USH	IVS67	c.14791+4A>G	CBE	p.(?)	intron variant	EUR	11
		1	USH	IVS56	c.11048-2A>G	CBE	p.(?)	splice	EUR	11
		1	USH	Exon54	c.10709G>T	N	p.(Cys3570Phe)	missense	EUR	11
UK	B240007	1	USH	Exon18	c.3831_3834delinsG	N	p.(Leu1278del)	inframe indel	NA	12
	B240007	1	USH	Exon6	c.920_923dup	N	p.(His308Glnfs*16)	null (frameshift)	NA	12
	B240009	1	RP	Exon13	c.2299del	N	p.(Glu767Serfs*21)	null (frameshift)	NA	12
	B240009	1	RP	IVS30	c.6050-1G>A	ABE	p.(?)	splice	NA	12
	B240013	1	RP	Exon18	c.3902G>T	N	p.(Gly1301Val)	missense	NA	12
	B240013	1	RP	Exon39	c.7334C>T	ABE	p.(Ser2445Phe)	missense	NA	12
	B240039	1	USH	Exon13	c.2299del	N	p.(Glu767Serfs*21)	null (frameshift)	NA	12
	B240039	1	USH	Exon13	c.2299del	N	p.(Glu767Serfs*21)	null (frameshift)	NA	12
	B240069	1	USH	Exon6	c.1055C>T	ABE	p.(Thr352Ile)	missense	NA	12
	B240069	1	USH	Exon63	c.12819T>A	N	p.(Tyr4273*)	null (nonsense)	NA	12
	B240075	1	RP	Exon4	c.653T>A	N	p.(Val218Glu)	missense	NA	12
	B240075	1	RP	Exon50	c.9882C>G	GBE	p.(Cys3294Trp)	missense	NA	12
	B240076	1	RP	Exon63	c.13274C>T	ABE	p.(Thr4425Met)	missense	NA	12
	B240076	1	RP	Exon45	c.8981G>A	ABE	p.(Trp2994*)	null (nonsense)	NA	12
	B240237	1	RP	Exon52	c.10342G>A	ABE	p.(Glu3448Lys)	missense	NA	12
	B240237	1	RP	Exon35	c.6670G>T	N	p.(Gly2224Cys)	missense	NA	12
	B240282	1	USH	Exon63	c.12954C>A	N	p.(Tyr4318*)	null (nonsense)	NA	12
	B240282	1	USH	Exon28	c.5603T>G	N	p.(Phe1868Cys)	missense	NA	12
	G000985	1	RP	Exon51	c.10073G>A	ABE	p.(Cys3358Tyr)	missense	EUR	12
	G000985	1	RP	Exon6	c.920_923dup	N	p.(His308Glnfs*16)	null (frameshift)	EUR	12
	G000991	1	RP	Exon63	c.12574C>T	ABE	p.(Arg4192Cys)	missense	EUR	12
	G000991	1	RP	Exon63	c.13316C>T	ABE	p.(Thr4439Ile)	missense	EUR	12
	G001010	1	RP	Exon51	c.10073G>A	ABE	p.(Cys3358Tyr)	missense	EUR	12
	G001010	1	RP	Exon13	c.2299del	N	p.(Glu767Serfs*21)	null (frameshift)	EUR	12
	G001023	1	RP	Exon63	c.13576C>T	ABE	p.(Arg4526*)	null (nonsense)	SAS	12
	G001023	1	RP	Exon19	c.4222C>T	ABE	p.(Gln1408*)	null (nonsense)	SAS	12
	G001032	1	USH	Exon12	c.2081G>A	ABE	p.(Cys694Tyr)	missense	EUR	12
	G001032	1	USH	Exon13	c.2299del	N	p.(Glu767Serfs*21)	null (frameshift)	EUR	12
	G001033	1	USH	Exon66	c.14426C>T	ABE	p.(Thr4809Ile)	missense	EUR	12
	G001033	1	USH	Exon13	c.2299del	N	p.(Glu767Serfs*21)	null (frameshift)	EUR	12
	G001034	1	USH	Exon13	c.2299del	N	p.(Glu767Serfs*21)	null (frameshift)	EUR	12
	G001034	1	USH	IVS40	c.7595-3C>G	GBE	p.(Pro2533Asnfs*5)	intron variant	EUR	12
	G001035	1	USH	Exon53	c.10561T>C	CBE	p.(Trp3521Arg)	missense	EUR	12
	G001035	1	USH	IVS40	c.7595-2144A>G	CBE	p.(Lys2532Thrfs*56)	intron variant	EUR	12
	G001036	1	USH	Exon63	c.12309delC	N	p.(Phe4103Leufs*11)	null (frameshift)	EUR	12
	G001036	1	USH	Exon63	c.12309delC	N	p.(Phe4103Leufs*11)	null (frameshift)	EUR	12
	G001037	1	USH	Exon13	c.2299del	N	p.(Glu767Serfs*21)	null (frameshift)	EUR	12
	G001037	1	USH	Exon13	c.2299del	N	p.(Glu767Serfs*21)	null (frameshift)	EUR	12
	G001037	1	USH	NA	NA	N	NA	copy number variation	EUR	12
	G001050	1	RP	Exon61	c.11864G>A	ABE	p.(Trp3955*)	null (nonsense)	EUR	12
	G001050	1	RP	Exon63	c.13335_13347delinsCTTG	N	p.(Glu4445_Ser4449delinsAspLeu)	inframe indel	EUR	12
	G001276	1	RP	Exon51	c.10073G>A	ABE	p.(Cys3358Tyr)	missense	EUR	12
	G001276	1	RP	Exon63	c.12575G>A	ABE	p.(Arg4192His)	missense	EUR	12
	G001367	1	RP	Exon25	c.5012G>A	ABE	p.(Gly1671Asp)	missense	SAS	12
	G001367	1	RP	Exon25	c.5012G>A	ABE	p.(Gly1671Asp)	missense	SAS	12
	G001402	1	RP	Exon13	c.2276G>T	N	p.(Cys759Phe)	missense	EUR	12
	G001402	1	RP	Exon33	c.6446C>A	N	p.(Pro2149Gln)	missense	EUR	12
	G001405	1	USH	Exon13	c.2299del	N	p.(Glu767Serfs*21)	null (frameshift)	EUR	12
	G001405	1	USH	Exon5	c.820C>G	GBE	p.(Arg274Gly)	missense	EUR	12
	G001407	1	RP	Exon13	c.2276G>T	N	p.(Cys759Phe)	missense	EUR	12
	G001407	1	RP	Exon21	c.4510dupA	N	p.(Arg1504Lysfs*26)	null (frameshift)	EUR	12
	G004708	1	RP	Exon18	c.4027A>C	N	p.(Asn1343His)	missense	SAS	12
	G004708	1	RP	Exon39	c.7358T>A	N	p.(Val2453Asp)	missense	SAS	12
	G004713	1	RP	Exon51	c.10073G>A	ABE	p.(Cys3358Tyr)	missense	EUR	12
	G004713	1	RP	Exon13	c.2276G>T	N	p.(Cys759Phe)	missense	EUR	12
	G005191	1	RP	Exon63	c.13335_13347delinsCTTG	N	p.(Glu4445_Ser4449delinsAspLeu)	inframe indel	EUR	12
	G005191	1	RP	NA	NA	N	NA	copy number variation	EUR	12
	G005199	1	RP	Exon51	c.10073G>A	ABE	p.(Cys3358Tyr)	missense	EUR	12
	G005199	1	RP	Exon13	c.2276G>T	N	p.(Cys759Phe)	missense	EUR	12
	G005490	1	USH	Exon15	c.2994A>T	N	p.(Arg998Ser)	missense	AFR	12
	G005490	1	USH	Exon17	c.3395G>A	ABE	p.(Gly1132Asp)	missense	AFR	12
	G005490	1	USH	Exon6	c.895delC	N	p.(Gln299Asnfs*37)	null (frameshift)	AFR	12
	G005518	1	RP	Exon62	c.12145G>A	ABE	p.(Ala4049Thr)	missense	AFR	12
	G005518	1	RP	Exon50	c.9785G>T	N	p.(Gly3262Val)	missense	AFR	12
	G005935	1	USH	Exon60	c.11694delC	N	p.(Asn3899Thrfs*34)	null (frameshift)	EUR	12
	G005935	1	USH	IVS15	c.3158-6A>G	CBE	p.(?)	intron variant	EUR	12
	G007281	1	RP	Exon25	c.5012G>A	ABE	p.(Gly1671Asp)	missense	SAS	12
	G007281	1	RP	Exon25	c.5012G>A	ABE	p.(Gly1671Asp)	missense	SAS	12
	G007282	1	RP	Exon13	c.2276G>T	N	p.(Cys759Phe)	missense	EUR	12
	G007282	1	RP	Exon13	c.2276G>T	N	p.(Cys759Phe)	missense	EUR	12
	G007678	1	RP	Exon63	c.12874A>G	CBE	p.(Asn4292Asp)	missense	SAS	12
	G007678	1	RP	Exon63	c.13126T>G	N	p.(Trp4376Gly)	missense	SAS	12
	G007683	1	RP	Exon57	c.11156G>A	ABE	p.(Arg3719His)	missense	EUR	12
	G007683	1	RP	Exon6	c.920_923dup	N	p.(His308Glnfs*16)	null (frameshift)	EUR	12
	G007706	1	RP	Exon63	c.12505A>G	CBE	p.(Thr4169Pro)	missense	EUR	12
	G007706	1	RP	Exon63	c.12505A>G	CBE	p.(Thr4169Pro)	missense	EUR	12
	G007743	1	RP	Exon2	c.100C>T	ABE	p.(Arg34*)	null (nonsense)	EUR	12
	G007743	1	RP	Exon6	c.926C>T	ABE	p.(Pro309Leu)	missense	EUR	12
	G008167	1	RP	Exon13	c.2802T>G	GBE*	p.(Cys934Trp)	missense	EAS	12
	G008167	1	RP	NA	NA	N	NA	copy number variation	EAS	12
	G009000	1	RP	Exon71	c.15433G>A	ABE	p.(Val5145Ile)	missense	EUR	12
	G009000	1	RP	Exon13	c.2522C>A	N	p.(Ser841Tyr)	missense	EUR	12
	W000148	1	RP	Exon63	c.13396C>T	ABE	p.(Pro4466Ser)	missense	EUR	12
	W000148	1	RP	Exon63	c.13396C>T	ABE	p.(Pro4466Ser)	missense	EUR	12
	W000148	1	RP	NA	NA	N	NA	copy number variation	EUR	12
	W000152	1	RP	Exon63	c.13331C>T	ABE	p.(Pro4444Leu)	missense	SAS	12
	W000152	1	RP	IVS41	c.8223+1G>C	GBE	p.(?)	splice	SAS	12
	W000153	1	RP	Exon13	c.2276G>T	N	p.(Cys759Phe)	missense	EUR	12
	W000153	1	RP	Exon13	c.2299del	N	p.(Glu767Serfs*21)	null (frameshift)	EUR	12
	W000158	1	USH	Exon50	c.9860_9873delATGATGGCCATGGC	N	p.(His3287Profs*54)	null (frameshift)	SAS	12
	W000158	1	USH	Exon50	c.9860_9873delATGATGGCCATGGC	N	p.(His3287Profs*54)	null (frameshift)	SAS	12
	W000159	1	USH	Exon13	c.2276G>T	N	p.(Cys759Phe)	missense	EUR	12
	W000159	1	USH	Exon13	c.2299del	N	p.(Glu767Serfs*21)	null (frameshift)	EUR	12
	W000160	1	RP	Exon13	c.2299del	N	p.(Glu767Serfs*21)	null (frameshift)	EUR	12
	W000160	1	RP	IVS48	c.9571-2A>G	CBE	p.(?)	splice	EUR	12
	W000182	1	RP	Exon63	c.13126T>G	N	p.(Trp4376Gly)	missense	SAS	12
	W000182	1	RP	Exon63	c.13331C>T	ABE	p.(Pro4444Leu)	missense	SAS	12
	W000189	1	RP	Exon59	c.11507C>T	ABE	p.(Pro3836Leu)	missense	EUR	12
	W000189	1	RP	IVS48	c.9571-2A>G	CBE	p.(?)	splice	EUR	12
	W000333	1	RP	Exon61	c.11875_11876del	N	p.(Gln3959Asnfs*53)	null (frameshift)	EUR	12
	W000333	1	RP	Exon63	c.13274C>T	ABE	p.(Thr4425Met)	missense	EUR	12
	W000369	1	CORD	Exon63	c.13374del	N	p.(Glu4458Aspfs*3)	null (frameshift)	EUR	12
	W000369	1	CORD	Exon13	c.2276G>T	N	p.(Cys759Phe)	missense	EUR	12
EUR	DK01U02698401	1	USH	Exon63	c.13268C>A	N	p.(Ala4423Asp)	missense	EUR	13
	DK01U02698401	1	USH	Exon17	c.3407G>A	ABE	p.(Ser1136Asn)	missense	EUR	13
	DK01U01845151	1	USH	Exon13	c.2299del	N	p.(Glu767Serfs*21)	null (frameshift)	EUR	13
	DK01U01845151	1	USH	Exon13	c.2299del	N	p.(Glu767Serfs*21)	null (frameshift)	EUR	13
	DK01U03886370	1	USH	Exon69	c.15017C>T	ABE	p.(Thr5006Met)	missense	EUR	13
	DK01U03886370	1	USH	Exon42	c.8557A>T	N	p.(Arg2853*)	null (nonsense)	EUR	13
	FR01U02A11551	1	USH	Exon63	c.12695C>T	ABE	p.(Pro4232Leu )	missense	EUR	13
	FR01U02A11551	1	USH	Exon9-21	c.(1550+1_1551-1)_(4627+1_4628-1)del	N	p.(?)	copy number variation	EUR	13
	FR01U03A1430	1	USH	Exon63	c.12845T>C	CBE	p.(Leu4282Pro)	missense	EUR	13
	FR01U03A1430	1	USH	Exon63	c.12845T>C	CBE	p.(Leu4282Pro)	missense	EUR	13
	FR01U04ATG700	1	USH	Exon55	c.10759C>T	ABE	p.(Gln3587*)	null (nonsense)	EUR	13
	FR01U04ATG700	1	USH	IVS34	c.6657+1G>C	GBE	p.(?)	splice	EUR	13
	FR02U05242	1	USH	Exon22	c.4668del	N	p.(Ile1557Leufs*18)	null (frameshift)	EUR	13
	FR02U05242	1	USH	IVS16	c.3317-1G>A	ABE	p.(?)	splice	EUR	13
	FR02U06392	1	USH	Exon63	c.12381_12382del	N	p.(Tyr4128Hisfs*24)	null (frameshift)	EUR	13
	FR02U06392	1	USH	Exon13	c.2299del	N	p.(Glu767Serfs*21)	null (frameshift)	EUR	13
	FR02U07472	1	USH	Exon20	c.4327A>C	N	p.(Thr1443Pro)	missense	EUR	13
	FR02U07472	1	USH	Exon61	c.11864G>A	ABE	p.(Trp3955*)	null (nonsense)	EUR	13
	FR02U08872	1	USH	IVS61	c.12067-2A>G	CBE	p.(?)	splice	EUR	13
	FR02U08872	1	USH	IVS61	c.12067-2A>G	CBE	p.(?)	splice	EUR	13
	FR02U081112	1	USH	Exon5-10	c.785-6636_1840+208del	N	p.(Leu263_Gly614del)	copy number variation	EUR	13
	FR02U081112	1	USH	Exon5-10	c.785-6636_1840+208del	N	p.(Leu263_Gly614del)	copy number variation	EUR	13
	FR02U091752	1	USH	Exon63	c.13316C>T	ABE	p.(Thr4439Ile)	missense	EUR	13
	FR02U091752	1	USH	Exon63	NA	N	p.(Arg4115Cys)Np.(Thr4425Met)	missense	EUR	13
	FR02U102062	1	USH	Exon6	c.920_923dup	N	p.(His308Glnfs*16)	null (frameshift)	EUR	13
	FR02U102062	1	USH	Exon10-21	c.(1644+1_1645-1)_(4627+1_4628-1)del	N	p.(?)	copy number variation	EUR	13
	FR02U113302	1	USH	Exon64	c.14091del	N	p.(Phe4697Leufs*2)	null (frameshift)	EUR	13
	FR02U113302	1	USH	Exon62	c.12093C>G	GBE	p.(Tyr4031*)	null (nonsense)	EUR	13
	FR02U123922	1	USH	Exon68	c.14803C>T	ABE	p.(Arg4935*)	null (nonsense)	EUR	13
	FR02U123922	1	USH	Exon6	c.920_923dup	N	p.(His308Glnfs*16)	null (frameshift)	EUR	13
	FR02U135262	1	USH	Exon66	c.14426C>T	ABE	p.(Thr4809Ile)	missense	EUR	13
	FR02U135262	1	USH	Exon13	c.2299del	N	p.(Glu767Serfs*21)	null (frameshift)	EUR	13
	FR02U146642	1	USH	Exon13	c.2755C>T	ABE	p.(Gln919*)	null (nonsense)	EUR	13
	FR02U146642	1	USH	Exon13	c.2299del	N	p.(Glu767Serfs*21)	null (frameshift)	EUR	13
	FR02U159252	1	USH	Exon15	NA	N	p.(Arg998Lys)	missense	EUR	13
	FR02U159252	1	USH	Exon6	c.949C>A	N	p.(=,Tyr318Cysfs*17)	synonymous	EUR	13
	FR02U1610392	1	USH	Exon6	c.852_853del	N	p.(Glu284Aspfs*38)	null (frameshift)	EUR	13
	FR02U1610392	1	USH	IVS40	c.7595-2144A>G	CBE	p.(Lys2532Thrfs*56)	intron variant	EUR	13
	FR02U1713932	1	USH	Exon44	c.8698T>A	N	p.(Tyr2900Asn )	missense	EUR	13
	FR02U1713932	1	USH	Exon25	c.5001dup	N	p.(Gly1668Argfs*30)	null (frameshift)	EUR	13
	FR02U1815092	1	USH	Exon65	c.14204C>G	GBE	p.(Pro4735Arg)	missense	EUR	13
	FR02U1815092	1	USH	IVS61	c.12067-2A>G	CBE	p.(?)	splice	EUR	13
	FR02U1915842	1	USH	Exon4	c.653T>A	N	p.(Val218Glu)	missense	EUR	13
	FR02U1915842	1	USH	Exon13	c.2299del	N	p.(Glu767Serfs*21)	null (frameshift)	EUR	13
	FR02U2016832	1	USH	Exon11	c.1876C>T	ABE	p.(Arg626*)	null (nonsense)	EUR	13
	FR02U2016832	1	USH	Exon13	c.2276G>T	N	p.(Cys759Phe)	missense	EUR	13
	FR02U2119962	1	USH	Exon18	c.3950T>A	N	p.(Leu1317*)	null (nonsense)	EUR	13
	FR02U2119962	1	USH	Exon13	c.2299del	N	p.(Glu767Serfs*21)	null (frameshift)	EUR	13
	FR02U2225512	1	USH	Exon6	c.859G>T	N	p.(Glu287*)	null (nonsense)	EUR	13
	FR02U2225512	1	USH	Exon6	c.1036A>C	N	p.(Asn346His)	missense	EUR	13
	FR02U2327632	1	USH	IVS16	c.3317-2A>G	CBE	p.(?)	splice	EUR	13
	FR02U2327632	1	USH	Exon13	c.2299del	N	p.(Glu767Serfs*21)	null (frameshift)	EUR	13
	FR02U2429002	1	USH	Exon62	c.12283G>A	ABE	p.(Gly4095Ser)	missense	EUR	13
	FR02U2429002	1	USH	Exon13	c.2299del	N	p.(Glu767Serfs*21)	null (frameshift)	EUR	13
	FR02U2529982	1	USH	Exon71	c.15380delC	N	p.(Pro5127Argfs*8)	null (frameshift)	EUR	13
	FR02U2529982	1	USH	Exon71	c.15380delC	N	p.(Pro5127Argfs*8)	null (frameshift)	EUR	13
	FR02U2730432	1	USH	Exon17	c.3737dup	N	p.(Ser1247Lysfs*4)	null (frameshift)	EUR	13
	FR02U2730432	1	USH	IVS71	c.9371+1G>T	N	p.(?)	splice	EUR	13
	FR02U2830812	1	USH	Exon62	c.12283G>A	ABE	p.(Gly4095Ser)	missense	EUR	13
	FR02U2830812	1	USH	Exon13	c.2276G>T	N	p.(Cys759Phe)	missense	EUR	13
	FR02U2934662	1	USH	Exon50	c.9791del	N	p.(Gly3264Valfs*37)	null (frameshift)	EUR	13
	FR02U2934662	1	USH	Exon71	c.15428G>A	ABE	p.(Arg5143His)	missense	EUR	13
	FR02U3036172	1	USH	Exon63	c.13231_13238dup	N	p.(Tyr4414Cysfs*12)	null (frameshift)	EUR	13
	FR02U3036172	1	USH	Exon13	c.2299del	N	p.(Glu767Serfs*21)	null (frameshift)	EUR	13
	FR02U3036172	1	USH	IVS59	c.11548+2T>G	N	p.(?)	splice	EUR	13
	FR02U3137132	1	USH	Exon36	c.6862G>T	N	p.(Glu2288*)	null (nonsense)	EUR	13
	FR02U3137132	1	USH	Exon69	c.14996C>T	ABE	p.(Thr4999Ile)	missense	EUR	13
	FR02U3241292	1	USH	Exon40	c.7524del	N	p.(Arg2509Glyfs*19)	null (frameshift)	EUR	13
	FR02U3241292	1	USH	Exon61	c.11864G>A	ABE	p.(Trp3955*)	null (nonsense)	EUR	13
	FR02U3342772	1	USH	Exon27	c.5522G>A	ABE	p.(Gly1841Glu)	missense	EUR	13
	FR02U3342772	1	USH	Exon5	c.802G>A	ABE	p.(Gly268Arg)	missense	EUR	13
	FR02U3443182	1	USH	Exon25	c.5129_5130insGAGC	N	p.(Ala1711Serfs*6)	null (frameshift)	EUR	13
	FR02U3443182	1	USH	Exon13	c.2299del	N	p.(Glu767Serfs*21)	null (frameshift)	EUR	13
	FR02U3545182	1	USH	Exon71	c.15364T>C	CBE	p.(Cys5122Arg)	missense	EUR	13
	FR02U3545182	1	USH	Exon24	c.4957C>T	ABE	p.(Arg1653*)	null (nonsense)	EUR	13
	FR02U3646012	1	USH	Exon63	c.12845T>C	CBE	p.(Leu4282Pro)	missense	EUR	13
	FR02U3646012	1	USH	Exon13	c.2276G>T	N	p.(Cys759Phe)	missense	EUR	13
	FR02U3750672	1	USH	IVS63	c.13811+2T>G	N	p.(?)	splice	EUR	13
	FR02U3750672	1	USH	Exon50	c.9815C>T	ABE	p.(Pro3272Leu)	missense	EUR	13
	FR02U2651202	1	USH	Exon6	c.920_923dup	N	p.(His308Glnfs*16)	null (frameshift)	EUR	13
	FR02U2651202	1	USH	Exon6	c.1036A>C	N	p.(Asn346His)	missense	EUR	13
	FR02U3851612	1	USH	Exon13	c.2209C>T	ABE	p.(Arg737*)	null (nonsense)	EUR	13
	FR02U3851612	1	USH	IVS58	c.11389+3A>G	CBE	p.(?)	intron variant	EUR	13
	FR02U3953202	1	USH	Exon12	c.1978G>A	ABE	p.(Gly660Arg)	missense	EUR	13
	FR02U3953202	1	USH	Exon4	c.653T>A	N	p.(Val218Glu)	missense	EUR	13
	FR02U4054352	1	USH	Exon7	c.1256G>T	N	p.(Cys419Phe)	missense	EUR	13
	FR02U4054352	1	USH	Exon71	c.15496A>G	CBE	p.(Ile5166Val)	missense	EUR	13
	FR02U4155612	1	USH	Exon7	c.1256G>T	N	p.(Cys419Phe)	missense	EUR	13
	FR02U4155612	1	USH	Exon63	c.12893A>G	CBE	p.(Tyr4298Cys)	missense	EUR	13
	FR02U4256182	1	USH	Exon2	c.100C>T	ABE	p.(Arg34*)	null (nonsense)	EUR	13
	FR02U4256182	1	USH	Exon57	c.11156G>A	ABE	p.(Arg3719His)	missense	EUR	13
	FR02U4357322	1	USH	Exon2	c.100C>T	ABE	p.(Arg34*)	null (nonsense)	EUR	13
	FR02U4357322	1	USH	Exon13	c.2299del	N	p.(Glu767Serfs*21)	null (frameshift)	EUR	13
	FR02U4457522	1	USH	Exon35	c.6730G>A	ABE	p.(Val2244Met)	missense	EUR	13
	FR02U4457522	1	USH	Exon63	c.13700delT	N	p.(Leu4567Profs*16)	null (frameshift)	EUR	13
	FR02U4559922	1	USH	Exon13	c.2299del	N	p.(Glu767Serfs*21)	null (frameshift)	EUR	13
	FR02U4559922	1	USH	Exon4	c.653T>A	N	p.(Val218Glu)	missense	EUR	13
	FR02U4660482	1	USH	IVS40	c.7595-3C>G	GBE	p.(Pro2533Asnfs*5)	intron variant	EUR	13
	FR02U4660482	1	USH	IVS40	c.7595-2144A>G	CBE	p.(Lys2532Thrfs*56)	intron variant	EUR	13
	FR02U4761072	1	USH	Exon63	c.13316C>T	ABE	p.(Thr4439Ile)	missense	EUR	13
	FR02U4761072	1	USH	Exon13	c.2299del	N	p.(Glu767Serfs*21)	null (frameshift)	EUR	13
	FR02U4861552	1	USH	Exon63	c.12302_12304delACA	N	p.(Asn4101del)	null (frameshift)	EUR	13
	FR02U4861552	1	USH	IVS67	c.14791+5G>T	N	p.(?)	intron variant	EUR	13
	FR02U4961592	1	USH	Exon11	c.1876C>T	ABE	p.(Arg626*)	null (nonsense)	EUR	13
	FR02U4961592	1	USH	Exon13	c.2299del	N	p.(Glu767Serfs*21)	null (frameshift)	EUR	13
	FR02U5061812	1	USH	Exon63	c.13010C>T	ABE	p.(Thr4337Met)	missense	EUR	13
	FR02U5061812	1	USH	Exon12	c.2149T>G	N	p.(Cys717Gly)	missense	EUR	13
	FR02U5163062	1	USH	Exon13	c.2299del	N	p.(Glu767Serfs*21)	null (frameshift)	EUR	13
	FR02U5163062	1	USH	Exon63	c.13010C>T	ABE	p.(Thr4337Met)	missense	EUR	13
	FR02U0163292	1	USH	Exon13	c.2299del	N	p.(Glu767Serfs*21)	null (frameshift)	EUR	13
	FR02U0163292	1	USH	Exon13	c.2299del	N	p.(Glu767Serfs*21)	null (frameshift)	EUR	13
	FR02U5267932	1	USH	Exon13	c.2299del	N	p.(Glu767Serfs*21)	null (frameshift)	EUR	13
	FR02U5267932	1	USH	Exon19	c.4222C>T	ABE	p.(Gln1408*)	null (nonsense)	EUR	13
	FR02U5368522	1	USH	Exon13	c.2299del	N	p.(Glu767Serfs*21)	null (frameshift)	EUR	13
	FR02U5368522	1	USH	Exon27	c.5447T>G	N	p.(Val1816Gly)	missense	EUR	13
	FR02U5470382	1	USH	Exon53	c.10481C>G	GBE	p.(Thr3494Arg)	missense	EUR	13
	FR02U5470382	1	USH	Exon68	c.14803C>T	ABE	p.(Arg4935*)	null (nonsense)	EUR	13
	FR02U5570582	1	USH	Exon51	c.10183G>T	N	p.(Glu3395*)	null (nonsense)	EUR	13
	FR02U5570582	1	USH	Exon64	c.13822C>T	ABE	p.(Arg4608*)	null (nonsense)	EUR	13
	FR02U5676022	1	USH	Exon13	c.2276G>T	N	p.(Cys759Phe)	missense	EUR	13
	FR02U5676022	1	USH	Exon22	c.4645C>T	ABE	p.(Arg1549*)	null (nonsense)	EUR	13
	FR02U5776512	1	USH	Exon61	c.11864G>A	ABE	p.(Trp3955*)	null (nonsense)	EUR	13
	FR02U5776512	1	USH	Exon63	c.13374del	N	p.(Glu4458Aspfs*3)	null (frameshift)	EUR	13
	FR02U5876892	1	USH	Exon13	c.2299del	N	p.(Glu767Serfs*21)	null (frameshift)	EUR	13
	FR02U5876892	1	USH	Exon69	c.15017C>T	ABE	p.(Thr5006Met)	missense	EUR	13
	FR02U5981182	1	USH	Exon13	c.2610C>A	N	p.(Cys870*)	null (nonsense)	EUR	13
	FR02U5981182	1	USH	Exon61	c.11864G>A	ABE	p.(Trp3955*)	null (nonsense)	EUR	13
	FR02U6081452	1	USH	Exon13	c.2299del	N	p.(Glu767Serfs*21)	null (frameshift)	EUR	13
	FR02U6081452	1	USH	Exon13	c.2296T>C	CBE	p.(Cys766Arg)	missense	EUR	13
	FR02U6181962	1	USH	Exon70	c.15089C>A	N	p.(Ser5030*)	null (nonsense)	EUR	13
	FR02U6181962	1	USH	Exon13	c.2802T>G	GBE*	p.(Cys934Trp)	missense	EUR	13
	FR02U6213037171	1	USH	Exon68	c.14803C>T	ABE	p.(Arg4935*)	null (nonsense)	EUR	13
	FR02U6213037171	1	USH	Exon66	c.14426C>T	ABE	p.(Thr4809Ile)	missense	EUR	13
	FR02U6313037701	1	USH	Exon13	c.2299del	N	p.(Glu767Serfs*21)	null (frameshift)	EUR	13
	FR02U6313037701	1	USH	Exon19-20	c.(4251+1_4252-1)_(4396+1_4397-1)del	N	p.(Ile1544Valfs*9)	null (frameshift)	EUR	13
	FR02U6413045260	1	USH	Exon65	c.14174G>A	ABE	p.(Trp4725*)	null (nonsense)	EUR	13
	FR02U6413045260	1	USH	Exon6	c.920_923dup	N	p.(His308Glnfs*16)	null (frameshift)	EUR	13
	FR02U6513049330	1	USH	Exon22	c.4714del	N	p.(Leu1572Phefs*3)	null (frameshift)	EUR	13
	FR02U6513049330	1	USH	IVS40	c.7595-2144A>G	CBE	p.(Lys2532Thrfs*56)	intron variant	EUR	13
	FR02U6614002801	1	USH	IVS45	c.9056-1_9056delinsTC	N	p.(?)	splice	EUR	13
	FR02U6614002801	1	USH	Exon12	c.2071T>C	CBE	p.(Cys691Arg)	missense	EUR	13
	FR02U6714057401	1	USH	Exon13	c.2299del	N	p.(Glu767Serfs*21)	null (frameshift)	EUR	13
	FR02U6714057401	1	USH	Exon65	c.14225_14232dup	N	p.(Val4745Argfs*4)	null (frameshift)	EUR	13
	FR02U68P04181	1	USH	Exon70	c.15089C>A	N	p.(Ser5030*)	null (nonsense)	EUR	13
	FR02U68P04181	1	USH	Exons35	c.(6658+1_6659-1)_(6805+1_6806-1)del	N	p.(?)	gross deletion	EUR	13
	FR02U69S14220	1	USH	Exon6	c.852_853del	N	p.(Glu284Aspfs*38)	null (frameshift)	EUR	13
	FR02U69S14220	1	USH	Exon12	c.2086T>A	N	p.(Cys696Ser)	missense	EUR	13
	FR02U70S21420	1	USH	Exon11	c.1876C>T	ABE	p.(Arg626*)	null (nonsense)	EUR	13
	FR02U70S21420	1	USH	Exon11	c.1876C>T	ABE	p.(Arg626*)	null (nonsense)	EUR	13
	FR02U71S27881	1	USH	Exon13	c.2299del	N	p.(Glu767Serfs*21)	null (frameshift)	EUR	13
	FR02U71S27881	1	USH	Exons32	c.(6163+1_6164-1)_(6325+1_6326-1)del	N	p.(?)	gross deletion	EUR	13
	FR02U72S57220	1	USH	Exon27	c.5528C>T	ABE	p.(Pro1843Leu)	missense	EUR	13
	FR02U72S57220	1	USH	Exon61	c.11864G>A	ABE	p.(Trp3955*)	null (nonsense)	EUR	13
	FR02U73U1020	1	USH	Exon68	c.14885dup	N	p.(Glu4963Glyfs*38)	null (frameshift)	EUR	13
	FR02U73U1020	1	USH	IVS22	c.4758+1G>A	ABE	p.(?)	splice	EUR	13
	FR02U74U1060	1	USH	Exon66	c.14450G>A	ABE	p.(Gly4817Glu)	missense	EUR	13
	FR02U74U1060	1	USH	Exon50	c.9799T>C	CBE	p.(Cys3267Arg)	missense	EUR	13
	FR02U75U1540	1	USH	Exons4	c.(651+1_652-1)_(784+1_785-1)del	N	p.(?)	gross deletion	EUR	13
	FR02U75U1540	1	USH	Exon45	c.9014G>C	GBE	p.(Ser3005Thr)	missense	EUR	13
	FR02U76U1651	1	USH	Exon56	c.10979del	N	p.(Ala3660fsVal*14)	null (frameshift)	EUR	13
	FR02U76U1651	1	USH	Exon61	c.11875_11876del	N	p.(Gln3959Asnfs*53)	null (frameshift)	EUR	13
	FR02U77U1680	1	USH	Exon13	c.2431A>T	N	p.(Lys811*)	null (nonsense)	EUR	13
	FR02U77U1680	1	USH	IVS40	c.7595-2144A>G	CBE	p.(Lys2532Thrfs*56)	intron variant	EUR	13
	FR02U78U1870	1	USH	Exon6	c.949C>A	N	p.(=,Tyr318Cysfs*17)	synonymous	EUR	13
	FR02U78U1870	1	USH	Exon63	c.12343C>T	ABE	p.(Arg4115Cys)	missense	EUR	13
	FR02U78U1870	1	USH	Exon63	c.13274C>T	ABE	p.(Thr4425Met)	missense	EUR	13
	FR02U79U1931	1	USH	Exon56	c.10979del	N	p.(Ala3660fsVal*14)	null (frameshift)	EUR	13
	FR02U79U1931	1	USH	IVS40	c.7595-2144A>G	CBE	p.(Lys2532Thrfs*56)	intron variant	EUR	13
	FR02U80U1990	1	USH	Exon3	c.562T>A	N	p.(Tyr188Asn)	missense	EUR	13
	FR02U80U1990	1	USH	Exon5	c.821G>A	ABE	p.(Arg274Gln)	missense	EUR	13
	FR02U81U2181	1	USH	Exon47	c.9345_9346delAC	N	p.(Pro3116Hisfs*13)	null (frameshift)	EUR	13
	FR02U81U2181	1	USH	Exon47	c.9345_9346delAC	N	p.(Pro3116Hisfs*13)	null (frameshift)	EUR	13
	FR02U82U2210	1	USH	Exon8	c.1531G>A	ABE	p.(Glu511Lys)	missense	EUR	13
	FR02U82U2210	1	USH	Exon62	c.12234_12235del	N	p.(Asn4079Trpfs*19)	null (frameshift)	EUR	13
	FR02U83U2220	1	USH	Exon36	c.6956del	N	p.(Leu2319Argfs*7)	null (frameshift)	EUR	13
	FR02U83U2220	1	USH	Exon13	c.2299del	N	p.(Glu767Serfs*21)	null (frameshift)	EUR	13
	FR02U83U2220	1	USH	Exon50	c.9862G>C	GBE	p.(Asp3288His)	missense	EUR	13
	FR02U84U2340	1	USH	Exon6	c.920_923dup	N	p.(His308Glnfs*16)	null (frameshift)	EUR	13
	FR02U84U2340	1	USH	Exon13	c.2299del	N	p.(Glu767Serfs*21)	null (frameshift)	EUR	13
	FR02U85U2531	1	USH	Exon66	c.14519T>C	CBE	p.(Leu4840Pro)	missense	EUR	13
	FR02U85U2531	1	USH	Exon66	c.14519T>C	CBE	p.(Leu4840Pro)	missense	EUR	13
	FR02U86U2561	1	USH	Exon63	c.13316C>T	ABE	p.(Thr4439Ile)	missense	EUR	13
	FR02U86U2561	1	USH	IVS40	c.7595-2144A>G	CBE	p.(Lys2532Thrfs*56)	intron variant	EUR	13
	FR02U87U2591	1	USH	Exon63	c.12343C>T	ABE	p.(Arg4115Cys)	missense	EUR	13
	FR02U87U2591	1	USH	Exon63	c.13274C>T	ABE	p.(Thr4425Met)	missense	EUR	13
	FR02U88U2610	1	USH	Exon13	c.2299del	N	p.(Glu767Serfs*21)	null (frameshift)	EUR	13
	FR02U88U2610	1	USH	Exon61	c.11819A>G	CBE	p.(Tyr3940Cys)	missense	EUR	13
	FR02U89U2631	1	USH	Exon50	c.9799T>C	CBE	p.(Cys3267Arg)	missense	EUR	13
	FR02U89U2631	1	USH	IVS2	c.486-2A>C	N	p.(?)	splice	EUR	13
	FR02U90U700	1	USH	Exon13	c.2299del	N	p.(Glu767Serfs*21)	null (frameshift)	EUR	13
	FR02U90U700	1	USH	Exon57	c.11105G>A	ABE	p.(Trp3702*)	null (nonsense)	EUR	13
	FR02U91U720	1	USH	Exon64	c.13927C>T	ABE	p.(Gln4643*)	null (nonsense)	EUR	13
	FR02U91U720	1	USH	Exon62	c.12175dup	N	p.(Ile4059Asnfs*40)	null (frameshift)	EUR	13
	FR02U92U741	1	USH	Exon47	c.9345_9346delAC	N	p.(Pro3116Hisfs*13)	null (frameshift)	EUR	13
	FR02U92U741	1	USH	Exon63	c.13010C>T	ABE	p.(Thr4337Met)	missense	EUR	13
	FR02U93U920	1	USH	Exon41	c.8143del	N	p.(Val2715*)	null (nonsense)	EUR	13
	FR02U93U920	1	USH	IVS40	c.7595-2144A>G	CBE	p.(Lys2532Thrfs*56)	intron variant	EUR	13
	FR02U94U991	1	USH	Exon60	c.11566del	N	p.(Ser3856Valfs*28)	null (frameshift)	EUR	13
	FR02U94U991	1	USH	Exon13	c.2299del	N	p.(Glu767Serfs*21)	null (frameshift)	EUR	13
	DE03U06091	1	USH	Exon9	c.1608C>A	N	p.(Cys536*)	null (nonsense)	EUR	13
	DE03U06091	1	USH	Exon13	c.2299del	N	p.(Glu767Serfs*21)	null (frameshift)	EUR	13
	DE03U07100	1	USH	Exon11	c.1876C>T	ABE	p.(Arg626*)	null (nonsense)	EUR	13
	DE03U07100	1	USH	Exon8	c.1546G>C	GBE	p.(Gly516Arg)	missense	EUR	13
	DE03U081001	1	USH	Exon9	c.1558T>C	CBE	p.(Cys520Arg)	missense	EUR	13
	DE03U081001	1	USH	Exon9	c.1558T>C	CBE	p.(Cys520Arg)	missense	EUR	13
	DE03U091011	1	USH	Exon53	c.10561T>C	CBE	p.(Trp3521Arg)	missense	EUR	13
	DE03U091011	1	USH	Exon13	c.2299del	N	p.(Glu767Serfs*21)	null (frameshift)	EUR	13
	DE03U101020	1	USH	Exon44	c.8834G>A	ABE	p.(Trp2945*)	null (nonsense)	EUR	13
	DE03U101020	1	USH	Exon33	c.6383G>A	ABE	p.(Cys2128Tyr)	missense	EUR	13
	DE03U111041	1	USH	Exon64	c.14131C>T	ABE	p.(Gln4711*)	null (nonsense)	EUR	13
	DE03U111041	1	USH	Exon53	c.10561T>C	CBE	p.(Trp3521Arg)	missense	EUR	13
	DE03U121140	1	USH	Exon62	c.12234_12235del	N	p.(Asn4079Trpfs*19)	null (frameshift)	EUR	13
	DE03U121140	1	USH	Exon62	c.12234_12235del	N	p.(Asn4079Trpfs*19)	null (frameshift)	EUR	13
	DE03U13121	1	USH	Exon54	c.10612C>T	ABE	p.(Arg3538*)	null (nonsense)	EUR	13
	DE03U13121	1	USH	Exon13	c.2299del	N	p.(Glu767Serfs*21)	null (frameshift)	EUR	13
	DE03U141201	1	USH	Exon68	c.14803C>T	ABE	p.(Arg4935*)	null (nonsense)	EUR	13
	DE03U141201	1	USH	Exon48	c.9424G>T	N	p.(Gly3142*)	null (nonsense)	EUR	13
	DE03U011240	1	USH	Exon13	c.2299del	N	p.(Glu767Serfs*21)	null (frameshift)	EUR	13
	DE03U011240	1	USH	Exon13	c.2299del	N	p.(Glu767Serfs*21)	null (frameshift)	EUR	13
	DE03U151250	1	USH	Exon16	c.3309C>A	N	p.(Tyr1103*)	null (nonsense)	EUR	13
	DE03U151250	1	USH	Exon6	c.1018C>G	GBE	p.(His340Asp)	missense	EUR	13
	DE03U161282	1	USH	Exon13	c.2299del	N	p.(Glu767Serfs*21)	null (frameshift)	EUR	13
	DE03U161282	1	USH	Exon63	c.12703C>T	ABE	p.(Gln4235*)	null (nonsense)	EUR	13
	DE03U171292	1	USH	Exon61	c.11864G>A	ABE	p.(Trp3955*)	null (nonsense)	EUR	13
	DE03U171292	1	USH	Exon60	c.(11548+1_11549-1)_(11711+1_11712-1)del	N	p.(?)	gross deletion	EUR	13
	DE03U181302	1	USH	Exon47	c.9270C>A	N	p.(Cys3090*)	null (nonsense)	EUR	13
	DE03U181302	1	USH	Exon61	c.11864G>A	ABE	p.(Trp3955*)	null (nonsense)	EUR	13
	DE03U191312	1	USH	IVS35	c.6805+2T>C	CBE	p.(?)	splice	EUR	13
	DE03U191312	1	USH	Exon6	c.1000C>T	ABE	p.(Arg334Trp)	missense	EUR	13
	DE03U201342	1	USH	Exon42	c.8522G>A	ABE	p.(Trp2841*)	null (nonsense)	EUR	13
	DE03U201342	1	USH	IVS46	c.9258+1G>A	ABE	p.(?)	splice	EUR	13
	DE03U21141	1	USH	Exon13	c.2299del	N	p.(Glu767Serfs*21)	null (frameshift)	EUR	13
	DE03U21141	1	USH	Exon47	c.9307A>G	CBE	p.(Ile3103Val)	missense	EUR	13
	DE03U221482	1	USH	Exon7	c.1144-2A>T	N	p.(?)	splice	EUR	13
	DE03U221482	1	USH	Exon61	c.11864G>A	ABE	p.(Trp3955*)	null (nonsense)	EUR	13
	DE03U231492	1	USH	Exon4	c.653T>A	N	p.(Val218Glu)	missense	EUR	13
	DE03U231492	1	USH	Exon13	c.2299del	N	p.(Glu767Serfs*21)	null (frameshift)	EUR	13
	DE03U241502	1	USH	Exon4	c.653T>A	N	p.(Val218Glu)	missense	EUR	13
	DE03U241502	1	USH	Exon61	c.11864G>A	ABE	p.(Trp3955*)	null (nonsense)	EUR	13
	DE03U25161	1	USH	Exon4	c.653T>A	N	p.(Val218Glu)	missense	EUR	13
	DE03U25161	1	USH	Exon7	c.1256G>T	N	p.(Cys419Phe)	missense	EUR	13
	DE03U26290	1	USH	Exon63	c.12419G>T	N	p.(Cys4140Phe)	missense	EUR	13
	DE03U26290	1	USH	Exon63	c.13374del	N	p.(Glu4458Aspfs*3)	null (frameshift)	EUR	13
	DE03U26290	1	USH	Exon60	c.11594C>A	N	p.(Ala3865Glu)	missense	EUR	13
	DE03U27321	1	USH	Exon6	c.949C>A	N	p.(=,Tyr318Cysfs*17)	synonymous	EUR	13
	DE03U27321	1	USH	Exon71	c.15496A>G	CBE	p.(Ile5166Val)	missense	EUR	13
	DE03U28360	1	USH	Exon55	c.10939G>A	ABE	p.(Gly3647Ser)	missense	EUR	13
	DE03U28360	1	USH	Exon38	c.7139_7140del	N	p.(Leu2380Profs*37)	null (frameshift)	EUR	13
	DE03U29381	1	USH	Exon61	c.11831C>A	N	p.(Ala3944Asp)	missense	EUR	13
	DE03U29381	1	USH	IVS28	c.5776+1G>A	ABE	p.(?)	splice	EUR	13
	DE03U30390	1	USH	Exon44	c.8835G>A	ABE	p.(Trp2945*)	null (nonsense)	EUR	13
	DE03U30390	1	USH	Exon22-24	c.4627+25435_4987+660del	N	p.(Gly1543_Pro1662del)	copy number variation	EUR	13
	DE03U31401	1	USH	Exon13	c.2299del	N	p.(Glu767Serfs*21)	null (frameshift)	EUR	13
	DE03U31401	1	USH	Exons16-21	c.(3157+1_3158-1)_(4627+1_4628-1)del	N	p.(?)	copy number variation	EUR	13
	DE03U32410	1	USH	Exon13	c.2610C>A	N	p.(Cys870*)	null (nonsense)	EUR	13
	DE03U32410	1	USH	Exons15	c.(2993+1_2994-1)_(3157+1_3158-1)del	N	p.(?)	gross deletion	EUR	13
	DE03U33461	1	USH	Exon4	c.775_776delAG	N	p.(Ser259Phefs*63)	null (frameshift)	EUR	13
	DE03U33461	1	USH	Exon61	c.11864G>A	ABE	p.(Trp3955*)	null (nonsense)	EUR	13
	DE03U34490	1	USH	IVS59	c.11549-1G>A	ABE	p.(?)	splice	EUR	13
	DE03U34490	1	USH	Exon13	c.2299del	N	p.(Glu767Serfs*21)	null (frameshift)	EUR	13
	DE03U35510	1	USH	Exon64	c.14131C>T	ABE	p.(Gln4711*)	null (nonsense)	EUR	13
	DE03U35510	1	USH	IVS28	c.5776+2T>C	CBE	p.(?)	splice	EUR	13
	DE03U36530	1	USH	Exon32	c.6225G>T	N	p.(Trp2075Cys)	missense	EUR	13
	DE03U36530	1	USH	Exon13	c.2299del	N	p.(Glu767Serfs*21)	null (frameshift)	EUR	13
	DE03U37541	1	USH	Exon53	c.10561T>C	CBE	p.(Trp3521Arg)	missense	EUR	13
	DE03U37541	1	USH	Exon13	c.2299del	N	p.(Glu767Serfs*21)	null (frameshift)	EUR	13
	DE03U38561	1	USH	Exon36	c.6929C>T	ABE	p.(Thr2310Met)	missense	EUR	13
	DE03U38561	1	USH	Exon13	c.2299del	N	p.(Glu767Serfs*21)	null (frameshift)	EUR	13
	DE03U02581	1	USH	Exon13	c.2299del	N	p.(Glu767Serfs*21)	null (frameshift)	EUR	13
	DE03U02581	1	USH	Exon13	c.2299del	N	p.(Glu767Serfs*21)	null (frameshift)	EUR	13
	DE03U05630	1	USH	Exon61	c.11864G>A	ABE	p.(Trp3955*)	null (nonsense)	EUR	13
	DE03U05630	1	USH	Exon61	c.11864G>A	ABE	p.(Trp3955*)	null (nonsense)	EUR	13
	DE03U39661	1	USH	Exon63	c.12574C>T	ABE	p.(Arg4192Cys)	missense	EUR	13
	DE03U39661	1	USH	Exon13	c.2610C>A	N	p.(Cys870*)	null (nonsense)	EUR	13
	DE03U40671	1	USH	Exon13	c.2299del	N	p.(Glu767Serfs*21)	null (frameshift)	EUR	13
	DE03U40671	1	USH	IVS40	c.7595-2144A>G	CBE	p.(Lys2532Thrfs*56)	intron variant	EUR	13
	DE03U41701	1	USH	Exon13	c.2299del	N	p.(Glu767Serfs*21)	null (frameshift)	EUR	13
	DE03U41701	1	USH	Exon60	c.(11548+1_11549-1)_(11711+1_11712-1)del	N	p.(?)	gross deletion	EUR	13
	DE03U42710	1	USH	Exon6	c.949C>A	N	p.(=,Tyr318Cysfs*17)	synonymous	EUR	13
	DE03U42710	1	USH	Exon61	c.11864G>A	ABE	p.(Trp3955*)	null (nonsense)	EUR	13
	DE03U43730	1	USH	IVS59	c.11549-1G>A	ABE	p.(?)	splice	EUR	13
	DE03U43730	1	USH	Exons15-63	c.(2993+1_2994-1)_(13811+1_13812-1)dup	N	p.(?)	copy number variation	EUR	13
	DE03U44750	1	USH	Exon57	c.11105G>A	ABE	p.(Trp3702*)	null (nonsense)	EUR	13
	DE03U44750	1	USH	Exon57	c.11105G>A	ABE	p.(Trp3702*)	null (nonsense)	EUR	13
	DE03U45770	1	USH	IVS28	c.5777-2A>G	CBE	p.(?)	splice	EUR	13
	DE03U45770	1	USH	Exon53	c.10561T>C	CBE	p.(Trp3521Arg)	missense	EUR	13
	DE03U03800	1	USH	Exon13	c.2299del	N	p.(Glu767Serfs*21)	null (frameshift)	EUR	13
	DE03U03800	1	USH	Exon13	c.2299del	N	p.(Glu767Serfs*21)	null (frameshift)	EUR	13
	DE03U46811	1	USH	Exon6	c.1036A>C	N	p.(Asn346His)	missense	EUR	13
	DE03U46811	1	USH	Exon61	c.11864G>A	ABE	p.(Trp3955*)	null (nonsense)	EUR	13
	DE03U47821	1	USH	Exon44	c.8755A>C	N	p.(Thr2919Pro)	missense	EUR	13
	DE03U47821	1	USH	Exon13	c.2610C>A	N	p.(Cys870*)	null (nonsense)	EUR	13
	DE03U48840	1	USH	IVS67	c.14791+2T>C	CBE	p.(?)	splice	EUR	13
	DE03U48840	1	USH	Exon47	c.9259-2402_9371+1537del	N	p.(?)	gross deletion	EUR	13
	DE03U49851	1	USH	Exon57	c.11105G>A	ABE	p.(Trp3702*)	null (nonsense)	EUR	13
	DE03U49851	1	USH	Exon57	c.11105G>A	ABE	p.(Trp3702*)	null (nonsense)	EUR	13
	DE03U04931	1	USH	Exon13	c.2299del	N	p.(Glu767Serfs*21)	null (frameshift)	EUR	13
	DE03U04931	1	USH	Exon13	c.2299del	N	p.(Glu767Serfs*21)	null (frameshift)	EUR	13
	DE03U50950	1	USH	Exon41	c.7950dup	N	p.(Asn2651Glnfs*10)	null (frameshift)	EUR	13
	DE03U50950	1	USH	Exon6	c.949C>A	N	p.(=,Tyr318Cysfs*17)	synonymous	EUR	13
	DE03U51960	1	USH	Exon63	c.13374del	N	p.(Glu4458Aspfs*3)	null (frameshift)	EUR	13
	DE03U51960	1	USH	Exon13	c.2299del	N	p.(Glu767Serfs*21)	null (frameshift)	EUR	13
	DE03U52980	1	USH	Exon64	c.14026dup	N	p.(Gln4676Profs*7)	null (frameshift)	EUR	13
	DE03U52980	1	USH	Exon61	c.11864G>A	ABE	p.(Trp3955*)	null (nonsense)	EUR	13
	DE03U53990	1	USH	Exon53	c.10561T>C	CBE	p.(Trp3521Arg)	missense	EUR	13
	DE03U53990	1	USH	Exon5-10	c.785-6636_1840+208del	N	p.(Leu263_Gly614del)	copy number variation	EUR	13
	DE03U549981	1	USH	Exon61	c.11864G>A	ABE	p.(Trp3955*)	null (nonsense)	EUR	13
	DE03U549981	1	USH	Exon28	c.5588T>C	CBE	p.(Met1863Thr)	missense	EUR	13
	DE03U5519602	1	USH	Exon61	c.11864G>A	ABE	p.(Trp3955*)	null (nonsense)	EUR	13
	DE03U5519602	1	USH	Exon6	c.908G>A	ABE	p.(Arg303His)	missense	EUR	13
	IT02U0110011	1	USH	Exon14	c.2859C>A	N	p.(Cys953*)	null (nonsense)	EUR	13
	IT02U0110011	1	USH	Exon61	c.11864G>A	ABE	p.(Trp3955*)	null (nonsense)	EUR	13
	IT02U0210041	1	USH	Exon6	c.990_991del	N	p.(Asn330Lysfs*8)	null (frameshift)	EUR	13
	IT02U0210041	1	USH	Exon54	c.10712C>T	ABE	p.(Thr3571Met)	missense	EUR	13
	IT02U0310050	1	USH	IVS67	c.14791+4A>G	CBE	p.(?)	intron variant	EUR	13
	IT02U0310050	1	USH	Exon54	c.10712C>T	ABE	p.(Thr3571Met)	missense	EUR	13
	IT02U0410110	1	USH	Exon6	c.854T>C	CBE	p.(Ile285Thr)	missense	EUR	13
	IT02U0410110	1	USH	Exon13	c.2209C>T	ABE	p.(Arg737*)	null (nonsense)	EUR	13
	IT02U0510130	1	USH	Exon18	c.4049del	N	p.(Ser1350Leufs*16)	null (frameshift)	EUR	13
	IT02U0510130	1	USH	Exon5	c.802G>A	ABE	p.(Gly268Arg)	missense	EUR	13
	IT02U0610141	1	USH	Exon55	c.10817T>C	CBE	p.(Leu3606Pro)	missense	EUR	13
	IT02U0610141	1	USH	IVS10	c.1841-2A>G	CBE	p.(Gly614Aspfs*6)	splice	EUR	13
	IT02U0710160	1	USH	Exon22	c.4717C>T	ABE	p.(Gln1573*)	null (nonsense)	EUR	13
	IT02U0710160	1	USH	Exon54	c.10712C>T	ABE	p.(Thr3571Met)	missense	EUR	13
	IT02U0810602	1	USH	Exon68	c.14977_14978del	N	p.(Phe4993Profs*7)	null (frameshift)	EUR	13
	IT02U0810602	1	USH	Exon68	c.14977_14978del	N	p.(Phe4993Profs*7)	null (frameshift)	EUR	13
	IT02U091070	1	USH	Exon35	c.6721C>A	N	p.(Pro2241Thr)	missense	EUR	13
	IT02U091070	1	USH	Exon13	c.2299del	N	p.(Glu767Serfs*21)	null (frameshift)	EUR	13
	IT02U1012180	1	USH	Exon6	c.1055C>T	ABE	p.(Thr352Ile)	missense	EUR	13
	IT02U1012180	1	USH	Exon54	c.10712C>T	ABE	p.(Thr3571Met)	missense	EUR	13
	IT02U111320	1	USH	Exon16	c.3251G>A	ABE	p.(Trp1084*)	null (nonsense)	EUR	13
	IT02U111320	1	USH	Exon13	c.2299del	N	p.(Glu767Serfs*21)	null (frameshift)	EUR	13
	IT02U1214361	1	USH	Exon57	c.11145T>G	GBE*	p.(Tyr3715*)	null (nonsense)	EUR	13
	IT02U1214361	1	USH	Exon54	c.10712C>T	ABE	p.(Thr3571Met)	missense	EUR	13
	IT02U1314641	1	USH	Exon6	c.926C>T	ABE	p.(Pro309Leu)	missense	EUR	13
	IT02U1314641	1	USH	Exon13	c.2299del	N	p.(Glu767Serfs*21)	null (frameshift)	EUR	13
	IT02U1414820	1	USH	Exon3	c.633G>A	ABE	p.(Trp211*)	null (nonsense)	EUR	13
	IT02U1414820	1	USH	Exon63	c.13018G>C	GBE	p.(Gly4340Arg)	missense	EUR	13
	IT02U1515091	1	USH	Exon68	c.14977_14978del	N	p.(Phe4993Profs*7)	null (frameshift)	EUR	13
	IT02U1515091	1	USH	Exon2	c.269A > G	N	p.(Tyr90Cys)	missense	EUR	13
	IT02U1615200	1	USH	Exon61	c.11864G>A	ABE	p.(Trp3955*)	null (nonsense)	EUR	13
	IT02U1615200	1	USH	Exon13	c.2299del	N	p.(Glu767Serfs*21)	null (frameshift)	EUR	13
	IT02U1715361	1	USH	Exon65	c.14248C>T	ABE	p.(Gln4750*)	null (nonsense)	EUR	13
	IT02U1715361	1	USH	Exon50	c.9811del	N	p.(Met3271Cysfs*30)	null (frameshift)	EUR	13
	IT02U1816640	1	USH	Exon45	c.8906C>G	GBE	p.(Ser2969*)	null (nonsense)	EUR	13
	IT02U1816640	1	USH	Exon45	c.8906C>G	GBE	p.(Ser2969*)	null (nonsense)	EUR	13
	IT02U1916760	1	USH	Exon63	c.12987T>G	GBE*	p.(Tyr4329*)	null (nonsense)	EUR	13
	IT02U1916760	1	USH	Exon8	c.1547G>T	N	p.(Gly516Val)	missense	EUR	13
	IT02U2017672	1	USH	IVS39	c.7452-1G>A	ABE	p.(?)	splice	EUR	13
	IT02U2017672	1	USH	IVS39	c.7452-1G>A	ABE	p.(?)	splice	EUR	13
	IT02U2118741	1	USH	Exon35	c.6724G>T	N	p.(Glu2242*)	null (nonsense)	EUR	13
	IT02U2118741	1	USH	Exon6	c.908G>A	ABE	p.(Arg303His)	missense	EUR	13
	IT02U2219552	1	USH	Exon41	c.7697del	N	p.(Tyr2566Leufs*11)	null (frameshift)	EUR	13
	IT02U2219552	1	USH	Exon47	c.9355C>T	ABE	p.(Arg3119Cys)	missense	EUR	13
	IT02U2319930	1	USH	Exon41	c.8099T>A	N	p.(Val2700Glu)	missense	EUR	13
	IT02U2319930	1	USH	Exon21	c.4474G>T	N	p.(Glu1492*)	null (nonsense)	EUR	13
	IT02U2420650	1	USH	Exon68	c.14977_14978del	N	p.(Phe4993Profs*7)	null (frameshift)	EUR	13
	IT02U2420650	1	USH	Exon68	c.14977_14978del	N	p.(Phe4993Profs*7)	null (frameshift)	EUR	13
	IT02U2521551	1	USH	Exon17	c.3684T>A	N	p.(Cys1228*)	null (nonsense)	EUR	13
	IT02U2521551	1	USH	Exon54	c.10712C>T	ABE	p.(Thr3571Met)	missense	EUR	13
	IT02U262321	1	USH	Exon41	c.7915T>C	CBE	p.(Ser2639Pro)	missense	EUR	13
	IT02U262321	1	USH	Exon41	c.7915T>C	CBE	p.(Ser2639Pro)	missense	EUR	13
	IT02U272481	1	USH	Exon61	c.11864G>A	ABE	p.(Trp3955*)	null (nonsense)	EUR	13
	IT02U272481	1	USH	Exons17-21	c.(3316+1_3317-1)_(4627+1_4628-1)del	N	p.(?)	copy number variation	EUR	13
	IT02U282841	1	USH	Exon54	c.10712C>T	ABE	p.(Thr3571Met)	missense	EUR	13
	IT02U282841	1	USH	Exon54	c.10712C>T	ABE	p.(Thr3571Met)	missense	EUR	13
	IT02U293311	1	USH	Exon40	c.7524del	N	p.(Arg2509Glyfs*19)	null (frameshift)	EUR	13
	IT02U293311	1	USH	Exon27	c.5329C>T	ABE	p.(Arg1777Trp)	missense	EUR	13
	IT02U304071	1	USH	Exon68	c.14885dup	N	p.(Glu4963Glyfs*38)	null (frameshift)	EUR	13
	IT02U304071	1	USH	Exon61	c.11864G>A	ABE	p.(Trp3955*)	null (nonsense)	EUR	13
	IT02U31410	1	USH	Exon54	c.10712C>T	ABE	p.(Thr3571Met)	missense	EUR	13
	IT02U31410	1	USH	Exon54	c.10712C>T	ABE	p.(Thr3571Met)	missense	EUR	13
	IT02U32601	1	USH	Exon18	c.3890_3891	N	p.(Phe1297Serfs*17)	null (frameshift)	EUR	13
	IT02U32601	1	USH	Exon19-20	c.(4251+1_4252-1)_(4396+1_4397-1)del	N	p.(Ile1544Valfs*9)	null (frameshift)	EUR	13
	IT02U337021	1	USH	Exon18	c.3890_3891	N	p.(Phe1297Serfs*17)	null (frameshift)	EUR	13
	IT02U337021	1	USH	Exon54	c.10712C>T	ABE	p.(Thr3571Met)	missense	EUR	13
	IT02U348231	1	USH	Exon18	c.3890_3891	N	p.(Phe1297Serfs*17)	null (frameshift)	EUR	13
	IT02U348231	1	USH	Exon54	c.10712C>T	ABE	p.(Thr3571Met)	missense	EUR	13
	SLO01U1110012	1	USH	Exon13	c.2610C>A	N	p.(Cys870*)	null (nonsense)	EUR	13
	SLO01U1110012	1	USH	Exon61	c.11864G>A	ABE	p.(Trp3955*)	null (nonsense)	EUR	13
	SLO01U1211052	1	USH	Exon24	c.4933G>T	N	p.(Gly1645*)	null (nonsense)	EUR	13
	SLO01U1211052	1	USH	Exon61	c.11864G>A	ABE	p.(Trp3955*)	null (nonsense)	EUR	13
	SLO01U1311062	1	USH	Exon2	c.232T>G	N	p.(Phe78Val)	missense	EUR	13
	SLO01U1311062	1	USH	Exon61	c.11864G>A	ABE	p.(Trp3955*)	null (nonsense)	EUR	13
	SLO01U1411072	1	USH	Exon22-24	c.4627+25435_4987+660del	N	p.(Gly1543_Pro1662del)	copy number variation	EUR	13
	SLO01U1411072	1	USH	Exon22-24	c.4627+25435_4987+660del	N	p.(Gly1543_Pro1662del)	copy number variation	EUR	13
	SLO01U1511102	1	USH	Exon13	c.2610C>A	N	p.(Cys870*)	null (nonsense)	EUR	13
	SLO01U1511102	1	USH	Exon61	c.11864G>A	ABE	p.(Trp3955*)	null (nonsense)	EUR	13
	SLO01U1611132	1	USH	Exon6	c.1055C>T	ABE	p.(Thr352Ile)	missense	EUR	13
	SLO01U1611132	1	USH	Exon61	c.11864G>A	ABE	p.(Trp3955*)	null (nonsense)	EUR	13
	SLO01U0111142	1	USH	Exon61	c.11864G>A	ABE	p.(Trp3955*)	null (nonsense)	EUR	13
	SLO01U0111142	1	USH	Exon61	c.11864G>A	ABE	p.(Trp3955*)	null (nonsense)	EUR	13
	SLO01U1711192	1	USH	Exon61	c.11864G>A	ABE	p.(Trp3955*)	null (nonsense)	EUR	13
	SLO01U1711192	1	USH	Exon56	c.11027C>T	ABE	p.(Thr3676Ile)	missense	EUR	13
	SLO01U1811212	1	USH	Exon24	c.4933G>T	N	p.(Gly1645*)	null (nonsense)	EUR	13
	SLO01U1811212	1	USH	Exon61	c.11864G>A	ABE	p.(Trp3955*)	null (nonsense)	EUR	13
	SLO01U0211322	1	USH	Exon61	c.11864G>A	ABE	p.(Trp3955*)	null (nonsense)	EUR	13
	SLO01U0211322	1	USH	Exon61	c.11864G>A	ABE	p.(Trp3955*)	null (nonsense)	EUR	13
	SLO01U0311332	1	USH	Exon61	c.11864G>A	ABE	p.(Trp3955*)	null (nonsense)	EUR	13
	SLO01U0311332	1	USH	Exon61	c.11864G>A	ABE	p.(Trp3955*)	null (nonsense)	EUR	13
	SLO01U1911352	1	USH	Exon61	c.11864G>A	ABE	p.(Trp3955*)	null (nonsense)	EUR	13
	SLO01U1911352	1	USH	Exon65	c.14287G>C	GBE	p.(Gly4763Arg)	missense	EUR	13
	SLO01U2011362	1	USH	Exon61	c.11864G>A	ABE	p.(Trp3955*)	null (nonsense)	EUR	13
	SLO01U2011362	1	USH	Exon44	c.8740C>T	ABE	p.(Arg2914*)	null (nonsense)	EUR	13
	SLO01U2111392	1	USH	Exon61	c.11864G>A	ABE	p.(Trp3955*)	null (nonsense)	EUR	13
	SLO01U2111392	1	USH	Exon62	c.12284G>A	ABE	p.(Gly4095Asp)	missense	EUR	13
	SLO01U2211422	1	USH	Exon61	c.11864G>A	ABE	p.(Trp3955*)	null (nonsense)	EUR	13
	SLO01U2211422	1	USH	Exon6	c.908G>A	ABE	p.(Arg303His)	missense	EUR	13
	SLO01U2211422	1	USH	Exon55	c.10852G>A	ABE	p.(Gly3618Ser)	missense	EUR	13
	SLO01U2311432	1	USH	Exon61	c.11864G>A	ABE	p.(Trp3955*)	null (nonsense)	EUR	13
	SLO01U2311432	1	USH	Exon50	c.9874C>T	ABE	p.(Gln3292*)	null (nonsense)	EUR	13
	SLO01U0411442	1	USH	Exon61	c.11864G>A	ABE	p.(Trp3955*)	null (nonsense)	EUR	13
	SLO01U0411442	1	USH	Exon61	c.11864G>A	ABE	p.(Trp3955*)	null (nonsense)	EUR	13
	SLO01U2411452	1	USH	Exon61	c.11864G>A	ABE	p.(Trp3955*)	null (nonsense)	EUR	13
	SLO01U2411452	1	USH	Exon6	c.908G>A	ABE	p.(Arg303His)	missense	EUR	13
	SLO01U2511542	1	USH	Exon63	c.12943A>C	N	p.(Thr4315Pro)	missense	EUR	13
	SLO01U2511542	1	USH	Exon13	c.2610C>A	N	p.(Cys870*)	null (nonsense)	EUR	13
	SLO01U2611562	1	USH	Exon13	c.2610C>A	N	p.(Cys870*)	null (nonsense)	EUR	13
	SLO01U2611562	1	USH	Exon61	c.11864G>A	ABE	p.(Trp3955*)	null (nonsense)	EUR	13
	SLO01U2711572	1	USH	Exon22	c.4645C>T	ABE	p.(Arg1549*)	null (nonsense)	EUR	13
	SLO01U2711572	1	USH	Exon61	c.11864G>A	ABE	p.(Trp3955*)	null (nonsense)	EUR	13
	SLO01U2811582	1	USH	Exon66	c.14570G>C	GBE	p.(Gly4857Ala)	missense	EUR	13
	SLO01U2811582	1	USH	Exon5	c.(784+1_785-1)_(848+1_849-1)del	N	p.(?)	gross deletion	EUR	13
	SLO01U2912142	1	USH	Exon11	c.1876C>T	ABE	p.(Arg626*)	null (nonsense)	EUR	13
	SLO01U2912142	1	USH	Exon61	c.11864G>A	ABE	p.(Trp3955*)	null (nonsense)	EUR	13
	SLO01U3012252	1	USH	Exon11	c.1876C>T	ABE	p.(Arg626*)	null (nonsense)	EUR	13
	SLO01U3012252	1	USH	Exon61	c.11864G>A	ABE	p.(Trp3955*)	null (nonsense)	EUR	13
	SLO01U3112272	1	USH	Exon13	c.2610C>A	N	p.(Cys870*)	null (nonsense)	EUR	13
	SLO01U3112272	1	USH	Exon13	c.2610C>A	N	p.(Cys870*)	null (nonsense)	EUR	13
	SLO01U0512362	1	USH	Exon61	c.11864G>A	ABE	p.(Trp3955*)	null (nonsense)	EUR	13
	SLO01U0512362	1	USH	Exon61	c.11864G>A	ABE	p.(Trp3955*)	null (nonsense)	EUR	13
	SLO01U0612372	1	USH	Exon61	c.11864G>A	ABE	p.(Trp3955*)	null (nonsense)	EUR	13
	SLO01U0612372	1	USH	Exon61	c.11864G>A	ABE	p.(Trp3955*)	null (nonsense)	EUR	13
	SLO01U3212512	1	USH	Exon2	c.232T>G	N	p.(Phe78Val)	missense	EUR	13
	SLO01U3212512	1	USH	Exon11	c.1876C>T	ABE	p.(Arg626*)	null (nonsense)	EUR	13
	SLO01U0712562	1	USH	Exon61	c.11864G>A	ABE	p.(Trp3955*)	null (nonsense)	EUR	13
	SLO01U0712562	1	USH	Exon61	c.11864G>A	ABE	p.(Trp3955*)	null (nonsense)	EUR	13
	SLO01U3312582	1	USH	Exon61	c.11864G>A	ABE	p.(Trp3955*)	null (nonsense)	EUR	13
	SLO01U3312582	1	USH	Exon17	c.3722_3729delinsTCA	N	p.(Ala1241Valfs*8)	null (frameshift)	EUR	13
	SLO01U3412612	1	USH	Exon35	c.6722C>A	N	p.(Pro2241His)	missense	EUR	13
	SLO01U3412612	1	USH	Exon61	c.11864G>A	ABE	p.(Trp3955*)	null (nonsense)	EUR	13
	SLO01U3512672	1	USH	Exon13	c.2610C>A	N	p.(Cys870*)	null (nonsense)	EUR	13
	SLO01U3512672	1	USH	Exon13	c.2610C>A	N	p.(Cys870*)	null (nonsense)	EUR	13
	SLO01U3612722	1	USH	Exon6	c.908G>A	ABE	p.(Arg303His)	missense	EUR	13
	SLO01U3612722	1	USH	Exon13	c.2610C>A	N	p.(Cys870*)	null (nonsense)	EUR	13
	SLO01U0812792	1	USH	Exon61	c.11864G>A	ABE	p.(Trp3955*)	null (nonsense)	EUR	13
	SLO01U0812792	1	USH	Exon61	c.11864G>A	ABE	p.(Trp3955*)	null (nonsense)	EUR	13
	SLO01U3712832	1	USH	Exon61	c.11864G>A	ABE	p.(Trp3955*)	null (nonsense)	EUR	13
	SLO01U3712832	1	USH	Exon62	c.12094G>A	ABE	p.(Gly4032Arg)	missense	EUR	13
	SLO01U3812852	1	USH	Exon61	c.11864G>A	ABE	p.(Trp3955*)	null (nonsense)	EUR	13
	SLO01U3812852	1	USH	Exon6	c.908G>A	ABE	p.(Arg303His)	missense	EUR	13
	SLO01U0912882	1	USH	Exon61	c.11864G>A	ABE	p.(Trp3955*)	null (nonsense)	EUR	13
	SLO01U0912882	1	USH	Exon61	c.11864G>A	ABE	p.(Trp3955*)	null (nonsense)	EUR	13
	SLO01U3913162	1	USH	Exon61	c.11864G>A	ABE	p.(Trp3955*)	null (nonsense)	EUR	13
	SLO01U3913162	1	USH	Exon62	c.12234_12235del	N	p.(Asn4079Trpfs*19)	null (frameshift)	EUR	13
	SLO01U4014012	1	USH	Exon61	c.11864G>A	ABE	p.(Trp3955*)	null (nonsense)	EUR	13
	SLO01U4014012	1	USH	Exon63	c.13374del	N	p.(Glu4458Aspfs*3)	null (frameshift)	EUR	13
	SLO01U10STG02062	1	USH	Exon61	c.11864G>A	ABE	p.(Trp3955*)	null (nonsense)	EUR	13
	SLO01U10STG02062	1	USH	Exon61	c.11864G>A	ABE	p.(Trp3955*)	null (nonsense)	EUR	13
	SP01U01107682	1	USH	Exon13	c.2299del	N	p.(Glu767Serfs*21)	null (frameshift)	EUR	13
	SP01U01107682	1	USH	IVS40	c.7595-2144A>G	CBE	p.(Lys2532Thrfs*56)	intron variant	EUR	13
Germany	11	1	RP	IVS19	c.4251+3A>G	CBE	p.(?)	intron variant	EUR	14
	11	1	RP	Exon61	c.11864G>A	ABE	p.(Trp3955*)	null (nonsense)	EUR	14
	12	1	RP	Exon13	c.2276G>T	N	p.(Cys759Phe)	missense	EUR	14
	12	1	RP	Exon63	c.12575G>A	ABE	p.(Arg4192His)	missense	EUR	14
	13	1	USH	Exon45-47	Deletion of Exons 45-47	N	deletion	copy number variation	EUR	14
	13	1	USH	Exon45-47	Deletion of Exons 45-47	N	deletion	copy number variation	EUR	14
	14	1	USH	Exon13	c.2299del	N	p.(Glu767Serfs*21)	null (frameshift)	EUR	14
	14	1	USH	Exon22	c.4714C>T	ABE	p.(Leu1572Phe)	missense	EUR	14
	14	1	USH	Exon63	c.13570A>G	CBE	p.(Lys4524Glu)	missense	EUR	14
	15	1	USH	Exon13	c.2276G>T	N	p.(Cys759Phe)	missense	EUR	14
	15	1	USH	Exon22	c.4710delT	N	p.(Phe1570Leufs*5)	null (frameshift)	EUR	14
	16	1	USH	Exon6	c.1137delG	N	p.(Gln379Hisfs*19)	null (frameshift)	EUR	14
	16	1	USH	Exon63	c.12575G>A	ABE	p.(Arg4192His)	missense	EUR	14
	17	1	USH	Exon56	c.10974_10975dup	N	p.(Thr3659Ilefs*16)	null (frameshift)	EUR	14
	17	1	USH	Exon36	c.6902T>C	CBE	p.(Leu2301Ser)	missense	EUR	14
	17	1	USH	Exon65	c.14219C>A	N	p.(Ala4740Asp)	missense	EUR	14
Germany		1	RP	Exon48	c.9433C>T	ABE	p.(Leu3145Phe)	missense	EUR	15
		1	RP	Exon63	c.13335_13347delinsCTTG	N	p.(Glu4445_Ser4449delinsAspLeu)	inframe indel	EUR	15
		1	RP	Exon48	c.9433C>T	ABE	p.(Leu3145Phe)	missense	EUR	15
		1	RP	Exon63	c.13335_13347delinsCTTG	N	p.(Glu4445_Ser4449delinsAspLeu)	inframe indel	EUR	15
		1	RP	Exon48	c.9433C>T	ABE	p.(Leu3145Phe)	missense	EUR	15
		1	RP	Exon63	c.13335_13347delinsCTTG	N	p.(Glu4445_Ser4449delinsAspLeu)	inframe indel	EUR	15
		1	RP	Exon13	c.2276G>T	N	p.(Cys759Phe)	missense	EUR	15
		1	RP	Exon63	c.13257_13263del	N	p.(Phe4419Leufs1*)	null (frameshift)	EUR	15
		1	RP	Exon13	c.2276G>T	N	p.(Cys759Phe)	missense	EUR	15
		1	RP	Exon63	c.13257_13263del	N	p.(Phe4419Leufs1*)	null (frameshift)	EUR	15
		1	RP	Exon13	c.2296T>C	CBE	p.(Cys766Arg)	missense	EUR	15
		1	RP	Exon61	c.11864G>A	ABE	p.(Trp3955*)	null (nonsense)	EUR	15
		1	RP	Exon14	Deletion Exon 14	N	deletion	gross deletion	EUR	15
		1	RP	Exon14	Deletion Exon 14	N	deletion	gross deletion	EUR	15
		1	RP	Exon28	c.5588T>C	CBE	p.(Met1863Thr)	missense	EUR	15
		1	RP	Exon61	c.11864G>A	ABE	p.(Trp3955*)	null (nonsense)	EUR	15
		1	RP	Exon13	c.2276G>T	N	p.(Cys759Phe)	missense	EUR	15
		1	RP	Exon13	c.2276G>T	N	p.(Cys759Phe)	missense	EUR	15
		1	RP	Exon13	c.2276G>T	N	p.(Cys759Phe)	missense	EUR	15
		1	RP	Exon13	c.2276G>T	N	p.(Cys759Phe)	missense	EUR	15
		1	RP	Exon13	c.2299del	N	p.(Glu767Serfs*21)	null (frameshift)	EUR	15
		1	RP	Exon57	c.11129G>A	ABE	p.(Gly3710Asp)	missense	EUR	15
		1	RP	Exon63	c.12574C>T	ABE	p.(Arg4192Cys)	missense	EUR	15
		1	RP	Exon2	c.176G>A	ABE	p.(Gly59Glu)	missense	EUR	15
		1	RP	Exon63	c.12574C>T	ABE	p.(Arg4192Cys)	missense	EUR	15
		1	RP	Exon2	c.176G>A	ABE	p.(Gly59Glu)	missense	EUR	15
		1	RP	Exon61	c.11864G>A	ABE	p.(Trp3955*)	null (nonsense)	EUR	15
		1	RP	Exon13	c.2276G>T	N	p.(Cys759Phe)	missense	EUR	15
		1	RP	Exon13	c.2276G>T	N	p.(Cys759Phe)	missense	EUR	15
		1	RP	Exon68	c.14895delG	N	p.(Leu4966*)	null (nonsense)	EUR	15
		1	RP	Exon47	c.9270C>A	N	p.(Cys3090*)	null (nonsense)	EUR	15
		1	RP	Exon13	c.2276G>T	N	p.(Cys759Phe)	missense	EUR	15
		1	RP	Exon28	c.5608C>T	ABE	p.(Arg1870Trp)	missense	EUR	15
		1	RP	Exon28	c.5608C>T	ABE	p.(Arg1870Trp)	missense	EUR	15
		1	RP	Exon13	c.2802T>G	GBE*	p.(Cys934Trp)	missense	EUR	15
		1	RP	Exon43	c.8641_8642insTATT	N	p.(Ser2881Leufs*9)	null (frameshift)	EUR	15
		1	RP	Exon13	c.2299del	N	p.(Glu767Serfs*21)	null (frameshift)	EUR	15
		1	RP	Exon63	c.13010C>T	ABE	p.(Thr4337Met)	missense	EUR	15
		1	RP	Exon18	c.3902G>T	N	p.(Gly1301Val)	missense	EUR	15
		1	RP	Exon63	c.13649T>G	N	p.(Val4550Gly)	missense	EUR	15
		1	RP	Exon24	c.4946G>A	ABE	p.(Gly1650Arg)	missense	EUR	15
		1	RP	Exon13	c.2444G>C	GBE	p.(Cys815Ser)	missense	EUR	15
		1	RP	IVS40	c.7595-2144A>G	CBE	p.(Lys2532Thrfs*56)	intron variant	EUR	15
		1	RP	Exon65	c.14219C>A	N	p.(Ala4740Asp)	missense	EUR	15
		1	CORD	Exon13	c.2231G>A	ABE	p.(Cys744Tyr)	missense	EUR	15
		1	CORD	Exon63	c.13804T>C	CBE	p.(Phe4602Leu)	missense	EUR	15
		1	CORD	Exon6	c.1143+1G>A	ABE	p.(?)	splice	EUR	15
		1	CORD	Exon13	c.2276G>T	N	p.(Cys759Phe)	missense	EUR	15
		1	USH	Exon5	c.828C>G	GBE	p.(Tyr276*)	null (nonsense)	EUR	15
		1	USH	Exon36	c.6902T>C	CBE	p.(Leu2301Ser)	missense	EUR	15
		1	USH	Exon48	c.9424G>T	N	p.(Gly3142*)	null (nonsense)	EUR	15
		1	USH	Exon63	c.13335_13347delinsCTTG	N	p.(Glu4445_Ser4449delinsAspLeu)	inframe indel	EUR	15
		1	USH	Exon13	c.2276G>T	N	p.(Cys759Phe)	missense	EUR	15
		1	USH	Exon60	c.11660G>T	N	p.(Trp3887Leu)	missense	EUR	15
		1	USH	Exon61	c.11713C>T	ABE	p.(Arg3905Cys)	missense	EUR	15
		1	USH	Exon61	c.11864G>A	ABE	p.(Trp3955*)	null (nonsense)	EUR	15
		1	USH	IVS38	c.7301-1G>A	ABE	p.(?)	splice	EUR	15
		1	USH	Exon36	c.6902T>C	CBE	p.(Leu2301Ser)	missense	EUR	15
		1	USH	Exon54	c.10712C>T	ABE	p.(Thr3571Met)	missense	EUR	15
		1	USH	Exon63	c.12525G>A	ABE	p.(Trp4175*)	null (nonsense)	EUR	15
		1	USH	Exon12	c.2080T>A	N	p.(Cys694Ser)	missense	EUR	15
		1	USH	Exon36	c.6835G>T	N	p.(Asp2279Tyr)	missense	EUR	15
		1	USH	Exon13	c.2276G>T	N	p.(Cys759Phe)	missense	EUR	15
		1	USH	Exon43-61	Duplication Exon 43-61	N	deletion	copy number variation	EUR	15
		1	USH	IVS10	c.1841-2A>G	CBE	p.(Gly614Aspfs*6)	splice	EUR	15
		1	USH	Exon63	c.12448A>G	CBE	p.(Thr4150Ala)	missense	EUR	15
		1	USH	Exon54	c.10712C>T	ABE	p.(Thr3571Met)	missense	EUR	15
		1	USH	Exon63	c.13335_13347delinsCTTG	N	p.(Glu4445_Ser4449delinsAspLeu)	inframe indel	EUR	15
		1	USH	Exon51	c.10073G>A	ABE	p.(Cys3358Tyr)	missense	EUR	15
		1	USH	Exon63	c.13130C>A	N	p.(Ser4377*)	null (nonsense)	EUR	15
		1	USH	Exon11	c.1876C>T	ABE	p.(Arg626*)	null (nonsense)	EUR	15
		1	USH	Exon54	c.10712C>T	ABE	p.(Thr3571Met)	missense	EUR	15
		1	USH	Exon63	c.12418T>G	N	p.(Cys4140Gly)	missense	EUR	15
		1	USH	Exon63	c.12418T>G	N	p.(Cys4140Gly)	missense	EUR	15
		1	USH	IVS12	c.2168-1G>C	GBE	p.(?)	splice	EUR	15
		1	USH	IVS45	c.9056-2A>G	CBE	p.(?)	splice	EUR	15
		1	USH	Exon63	c.13335_13347delinsCTTG	N	p.(Glu4445_Ser4449delinsAspLeu)	inframe indel	EUR	15
		1	USH	Exon61	c.11864G>A	ABE	p.(Trp3955*)	null (nonsense)	EUR	15
		1	USH	Exon50	c.9921T>G	GBE*	p.(Cys3307Trp)	missense	EUR	15
		1	USH	Exon62	c.12284G>A	ABE	p.(Gly4095Asp)	missense	EUR	15
		1	USH	Exon13	c.2299del	N	p.(Glu767Serfs*21)	null (frameshift)	EUR	15
		1	USH	Exon35	c.6670G>T	N	p.(Gly2224Cys)	missense	EUR	15
		1	USH	Exon13	c.2276G>T	N	p.(Cys759Phe)	missense	EUR	15
		1	USH	Exon59-60	Deletion Exon 59-60	N	deletion	copy number variation	EUR	15
		1	USH	Exon24	c.4943T>C	CBE	p.(Leu1648Pro)	missense	EUR	15
		1	USH	Exon63	c.13283G>T	N	p.(G4428Val)	missense	EUR	15
		1	USH	Exon13	c.2276G>T	N	p.(Cys759Phe)	missense	EUR	15
		1	USH	Exon53	c.10561T>C	CBE	p.(Trp3521Arg)	missense	EUR	15
		1	USH	Exon6	c.949C>A	N	p.(=,Tyr318Cysfs*17)	synonymous	EUR	15
		1	USH	Exon17	c.3692G>A	ABE	p.(Ser1231Asn)	missense	EUR	15
		1	USH	Exon13	c.2299del	N	p.(Glu767Serfs*21)	null (frameshift)	EUR	15
		1	USH	Exon62	c.12268C>A	N	p.(Pro4090Thr)	missense	EUR	15
		1	USH	Exon13	c.2276G>T	N	p.(Cys759Phe)	missense	EUR	15
		1	USH	IVS28	c.5776+1G>A	ABE	p.(?)	splice	EUR	15
		1	USH	Exon13	c.2299del	N	p.(Glu767Serfs*21)	null (frameshift)	EUR	15
		1	USH	Exon63	c.13804T>C	CBE	p.(Phe4602Leu)	missense	EUR	15
		1	USH	Exon13	c.2276G>T	N	p.(Cys759Phe)	missense	EUR	15
		1	USH	Exon47	c.9270C>A	N	p.(Cys3090*)	null (nonsense)	EUR	15
		1	USH	Exon13	c.2276G>T	N	p.(Cys759Phe)	missense	EUR	15
		1	USH	Exon44	c.8834G>A	ABE	p.(Trp2945*)	null (nonsense)	EUR	15
		1	USH	Exon62	c.12268C>A	N	p.(Pro4090Thr)	missense	EUR	15
		1	USH	Exon61	c.11864G>A	ABE	p.(Trp3955*)	null (nonsense)	EUR	15
		1	USH	Exon13	c.2276G>T	N	p.(Cys759Phe)	missense	EUR	15
		1	USH	Exon53	c.10495C>A	N	p.(Pro3499Thr)	missense	EUR	15
		1	USH	Exon51	c.10182G>A	ABE	p.(Lys3394=)	synonymous	EUR	15
		1	USH	Exon51	c.10182G>A	ABE	p.(Lys3394=)	synonymous	EUR	15
		1	USH	Exon63	c.13335_13347delinsCTTG	N	p.(Glu4445_Ser4449delinsAspLeu)	inframe indel	EUR	15
		1	USH	Exon63	c.13335_13347delinsCTTG	N	p.(Glu4445_Ser4449delinsAspLeu)	inframe indel	EUR	15
		1	USH	Exon48	c.9424G>T	N	p.(Gly3142*)	null (nonsense)	EUR	15
		1	USH	Exon53	c.10465G>A	ABE	p.(Ala3489Thr)	missense	EUR	15
		1	USH	IVS61	c.12067-2A>G	CBE	p.(?)	splice	EUR	15
		1	USH	Exon55	c.10859T>C	CBE	p.(Ile3620Thr)	missense	EUR	15
		1	USH	Exon8	c.1390C>T	ABE	p.(Arg464Cys)	missense	EUR	15
		1	USH	Exon44	c.8782G>T	N	p.(Gly2928*)	null (nonsense)	EUR	15
		1	USH	IVS16	c.3317-2A>G	CBE	p.(?)	splice	EUR	15
		1	USH	Exon54	c.10721G>T	N	p.(Gly3574Val)	missense	EUR	15
		1	USH	Exon4	c.653T>A	N	p.(Val218Glu)	missense	EUR	15
		1	USH	Exon13	c.2276G>T	N	p.(Cys759Phe)	missense	EUR	15
		1	USH	Exon67	c.14650G>T	N	p.(Glu4884*)	null (nonsense)	EUR	15
[truncated: 1,614 more rows]
